# Supplementary material for: Vortioxetine treatment for generalised anxiety disorder: a meta-analysis of anxiety, quality of life and safety outcomes
Source: PubMed Central journal article supplement — BMJ Open. 2019 Nov 28;9(11):e033161. doi: 10.1136/bmjopen-2019-033161 (PMC6924794; doi:10.1136/bmjopen-2019-033161), 2019-11-28
Supplement: bmjopen-2019-033161.draft_revisions.pdf [file bmjopen-2019-033161.draft_revisions.pdf]

# BMJ Open

BMJ Open is committed to open peer review. As part of this commitment we make the peer review history of every article we publish publicly available.

When an article is published we post the peer reviewers' comments and the authors' responses online. We also post the versions of the paper that were used during peer review. These are the versions that the peer review comments apply to.

The versions of the paper that follow are the versions that were submitted during the peer review process. They are not the versions of record or the final published versions. They should not be cited or distributed as the published version of this manuscript.

BMJ Open is an open access journal and the full, final, typeset and author-corrected version of record of the manuscript is available on our site with no access controls, subscription charges or pay-per-view fees (<http://bmjopen.bmj.com>).

If you have any questions on BMJ Open's open peer review process please email [info.bmjopen@bmj.com](mailto:info.bmjopen@bmj.com)

# BMJ Open

## Vortioxetine Treatment for Generalized Anxiety Disorder: A Meta-Analysis of Anxiety, Quality of Life, and Safety Outcomes

|                               |                                                                                                                                                                                                                                                                                                                                                                                                                                                                                                                                                                                                                                                                                                                                                                                                                                |
|-------------------------------|--------------------------------------------------------------------------------------------------------------------------------------------------------------------------------------------------------------------------------------------------------------------------------------------------------------------------------------------------------------------------------------------------------------------------------------------------------------------------------------------------------------------------------------------------------------------------------------------------------------------------------------------------------------------------------------------------------------------------------------------------------------------------------------------------------------------------------|
| Journal:                      | <i>BMJ Open</i>                                                                                                                                                                                                                                                                                                                                                                                                                                                                                                                                                                                                                                                                                                                                                                                                                |
| Manuscript ID                 | bmjopen-2019-033161                                                                                                                                                                                                                                                                                                                                                                                                                                                                                                                                                                                                                                                                                                                                                                                                            |
| Article Type:                 | Research                                                                                                                                                                                                                                                                                                                                                                                                                                                                                                                                                                                                                                                                                                                                                                                                                       |
| Date Submitted by the Author: | 23-Jul-2019                                                                                                                                                                                                                                                                                                                                                                                                                                                                                                                                                                                                                                                                                                                                                                                                                    |
| Complete List of Authors:     | Bin, Qin; Affiliated Liuzhou General Hospital of Guangxi University of Science and Technology<br>Huang, Guangsu; Affiliated Liuzhou General Hospital of Guangxi University of Science and Technology, Department of Neurology<br>Yang, Qian; Affiliated Liuzhou General Hospital of Guangxi University of Science and Technology, Department of Neurology<br>Zhao, Mingjun; The Second Affiliated Hospital of Xinxiang Medical University<br>Chen, Hong; Affiliated Liuzhou General Hospital of Guangxi University of Science and Technology, Department of Neurology<br>Gao, Wen; Affiliated Liuzhou General Hospital of Guangxi University of Science and Technology, Department of Neurology<br>Yang, Mingxiu; Affiliated Liuzhou General Hospital of Guangxi University of Science and Technology, Department of Neurology |
| Keywords:                     | Multimodal therapy, Generalized anxiety disorder, Vortioxetine, Meta-analysis                                                                                                                                                                                                                                                                                                                                                                                                                                                                                                                                                                                                                                                                                                                                                  |
|                               |                                                                                                                                                                                                                                                                                                                                                                                                                                                                                                                                                                                                                                                                                                                                                                                                                                |

SCHOLARONE™  
Manuscripts

1  
2  
3 1 **Vortioxetine Treatment for Generalized Anxiety Disorder: A Meta-Analysis of**  
4 **Anxiety, Quality of Life, and Safety Outcomes**  
5  
6  
7

8 3

9  
10 4

11 5 Bin Qin,<sup>1</sup> Guangsu Huang,<sup>1</sup> Qian Yang,<sup>1</sup> Mingjun Zhao,<sup>2</sup> Hong Chen,<sup>1</sup> Wen Gao,<sup>1</sup> Mingxiu Yang<sup>1</sup>

12 6

13 7

14 8 **Author affiliations**

15 9 <sup>1</sup>Department of Neurology, Affiliated Liuzhou General Hospital of Guangxi University of Science and  
16 10 Technology (Liuzhou General Hospital), Liuzhou 545006, Guangxi, China,

17 11 <sup>2</sup>Department of Pharmacy, The Second Affiliated Hospital of Xinxiang Medical University (Henan Mental  
18 12 Hospital), Xinxiang 453000, China.

19 13

20 14 Correspondence to Professor Mingxiu Yang; lzmyyymx@126.com.

21 15

22 16

23 17 Bin Qin, Guangsu Huang and Qian Yang contributed equally to this study

24 18

25 19

26 20  
27  
28  
29  
30  
31  
32  
33  
34  
35  
36  
37  
38  
39  
40  
41  
42  
43  
44  
45  
46  
47  
48  
49  
50  
51  
52  
53  
54  
55  
56  
57  
58  
59  
60

**Abstract:**

**Objectives** The aim of this study was to investigate the efficacy, tolerability, safety, and impact on quality of life (QoL) and functional status of vortioxetine treatment for patients with generalized anxiety disorder (GAD) by performing a meta-analysis of randomized controlled trials.

**Methods** Data mining was conducted in January 2019 across PubMed, EMBASE, PsycINFO, Cochrane Central Register of Controlled Trials Cochrane Library, Web of science, and ClinicalTrials.gov. Four publications, reporting data from a total of four randomized controlled trials, were included. Relevant data was extracted and synthesized narratively. Results were expressed as standardized mean differences (SMDs) or odds ratios (ORs) with 95% confidence intervals (CIs).

**Results** Our meta-analysis showed that multiple doses (2.5, 5, and 10 mg/day) of vortioxetine did not significantly improve the response rates, compared to placebo (OR = 1.16, 95% CI=0.84–1.60, P=0.38; OR = 1.41, 95% CI=0.82–2.41, P=0.21; and OR = 1.05, 95% CI=0.76–1.46, P=0.75). Moreover, there was no statistically significant difference regarding the remission rates, discontinuation for any reason rates, discontinuation due to adverse events rates, Short Form 36 Health Survey scores, or Sheehan Disability Scale scores between administration of multiple doses (2.5, 5, and 10 mg/day) of vortioxetine and placebo.

**Conclusions** Although our results suggest that vortioxetine did not improve the generalized anxiety disorder symptoms and QoL and functional status impairment of patients with GAD, it was safe and well tolerated. Clinicians should interpret and translate our data with caution, as the meta-analysis was based on a limited number of randomized controlled trials.

**Keywords:** Multimodal therapy; Generalized anxiety disorder; Vortioxetine; Meta-analysis

**Word count:** 3293.

**Strengths and limitations of this study**

- ▶ This systematic review and meta-analysis provides evidence for the efficacy, tolerability, and safety of vortioxetine in patients with generalized anxiety disorder
- ▶ Improvement of quality of life and functional status impairment were also evaluated to judge the patients' well-being of vortioxetine.
- ▶ Strong and reliable methodological and statistical procedures were applied.
- ▶ Due to the short-term follow-up in the evaluated studies, the long-term effect was not studied.

## 1 Introduction

2 Generalized anxiety disorder (GAD) is a common, chronic, costly, and disabling mental disorder that is  
3 marked by persistent anxiety and worry, and multiple psychological and physical symptoms.<sup>1,2</sup> It is also  
4 characterized by various psychological and somatic complaints, such as autonomic arousal, restlessness,  
5 fatigue, problems with concentration, irritability, and sleeplessness.<sup>1</sup> The estimated 1-year prevalence rate  
6 of GAD is between 1.2% and 1.9%, and the lifetime prevalence is between 4.3% and 5.9%.<sup>2,3</sup> Since most  
7 patients are still affected for 6 to 12 years after diagnosis, GAD is usually considered a chronic disorder and  
8 a major burden on the individual, their family, and health care services.<sup>2,4</sup>

9 Vortioxetine is a multimodal antidepressant that was approved for the treatment of major depressive  
10 disorder (MDD), by the US Food and Drug Administration (FDA) in September 2013. Vortioxetine's  
11 mechanism of action is related to its multimodal activity, which combines two pharmacological properties:  
12 direct modulation of receptor activity and inhibition of the 5-HT transporter. Several meta-analyses have  
13 proved the efficacy of vortioxetine for the treatment of MDD.<sup>5-7</sup> Clinical trials evaluating its efficacy for  
14 the treatment of GAD, with doses up to 10 mg/day, have also yielded some interesting findings.<sup>8-11</sup>  
15 Moreover, as vortioxetine has been proven to be efficient in the treatment of MDD comorbid with GAD, it  
16 is possible that it constitutes an effective treatment for GAD alone, as well.<sup>12</sup> Interestingly, the efficacy of  
17 vortioxetine therapy in reducing anxiety symptom severity in GAD is summarized in two previous meta-  
18 analyses.<sup>13,14</sup> Both reviews analyzed its efficacy only in terms of symptom severity on the underlying  
19 continuous rating scales, and did not assess dichotomous response and remission outcomes. However, a  
20 recent meta-analysis examined the efficacy of multiple doses of vortioxetine in terms of dichotomous  
21 response outcomes, and the results showed no significant improvement in the outcomes of treating GAD  
22 with vortioxetine compared to treating GAD with placebo.<sup>15</sup> The efficacy was only assessed using  
23 continuous rating scales or dichotomous response; thus, the authors of these meta-analyses and of a  
24 relevant narrative review noted that a comprehensive summary of efficacy data is missing. Further, both  
25 these reviews only provided an assessment of efficacy and safety outcomes, and did not include outcomes  
26 of importance and patient-focused assessments, such as assessment of functional impairment and quality of  
27 life (QoL).

28 Currently there is growing interest in assessing the QoL and functional status impairment in patients  
29 with psychological disorders. In addition, the importance of including such assessments in evaluations of  
30 the influence of psychological disorders and their treatment, is widely recognized.<sup>16-19</sup> Our previous  
31 network meta-analysis concluded that risperidone and aripiprazole improved the QoL of patients with  
32 treatment-resistant depression.<sup>20</sup> Despite the growing interest in the field, studies addressing the impairment  
33 of QoL and functional status caused by anxiety disorders have progressed slowly.<sup>21</sup> Moreover, GAD is an  
34 important public mental health problem that causes poor QoL and functional status impairment,<sup>16</sup> with  
35 substantial impact on work and social roles.<sup>22</sup> Thus, the outcome of post-treatment QoL assessments is  
36 recognized as an important measure of treatment efficacy for patients with GAD.<sup>23</sup>

37 The assessment of antianxiety therapy benefits on QoL and functional status impairment in patients

1 with GAD is becoming increasingly common in clinical studies, mainly because, both aspects are important  
2 for the patients' overall well-being and recovery. Currently, the direct effect of vortioxetine treatment on  
3 QoL and functional status impairment in patients with GAD is unclear. Therefore, this meta-analysis was  
4 conducted to provide a comprehensive estimate of the efficacy, safety, and improving QoL and functional  
5 status impairment profiles of vortioxetine treatment of GAD.

## 6 7 **Methods**

8 All steps of this review were performed in strict accordance with the Cochrane Handbook for Systematic  
9 Reviews of Interventions.<sup>24</sup> The PRISMA statement guidelines were followed during the meta-analysis and  
10 preparation of this review.<sup>25</sup>

### 11 12 **Search strategy**

13 As of January 2019, we searched PubMed, EMBASE, PsycINFO, Cochrane Central Register of Controlled  
14 Trials (Cochrane Library), Web of science, and ClinicalTrials.gov (www.clinicaltrials.gov). Search terms  
15 included “vortioxetine OR Lu AA21004” OR Brintellix” AND “anxiety OR anxiety disorder OR anxiety  
16 disorders OR mood disorder OR mood disorders.” No language or time restrictions were applied. Titles and  
17 abstracts were screened by two independent reviewers, before full texts of potentially relevant articles were  
18 retrieved for further evaluation. The decision to include a study was then made by two independent  
19 reviewers, after full-text review. The reference lists of included articles were further hand-searched to  
20 identify additional relevant articles.

### 21 22 **Eligibility Criteria and Study Selection**

23 We included all clinical trials meeting the following criteria: (a) randomized controlled trials  
24 (RCTs) involving patients ( $\geq 18$  years old) primarily diagnosed with GAD, according to the criteria of the  
25 Diagnostic and Statistical Manual of Mental Disorders, fourth edition, text revision (DSM-IV-TR), and (b)  
26 RCTs comparing outcomes in efficacy, QoL, and functional impairment between vortioxetine and placebo.  
27 We excluded (a) retrospective and observational studies; (b) non-human studies; (c) theses and conference  
28 abstracts; and (d) studies including patients that had any concurrent psychiatric disorders with GAD or any  
29 prior history of psychiatric disorders, such as manic or hypomanic episodes, schizophrenia, or substance  
30 use disorders. Eligibility screening was performed in two steps, each by two independent reviewers (BQ  
31 and WG): (a) title and abstract screening for relevance to the study objective, and (b) full text screening for  
32 eligibility for a meta-analysis. Conflicts were resolved by the opinion of a third reviewer (MY).

### 33 34 **Outcomes**

35 Efficacy measures

36 Response was defined across studies as a 50% improvement of the Hamilton Anxiety Rating Scale (HAM-

1 A) total score from baseline to end point. Remission was defined as a HAM-A total score of  $\leq 7$  at the  
2 study end point. The continuous measure of efficacy was the mean change from baseline in total scores on  
3 the HAM-A, as defined by the individual study.

#### 4 Safety and tolerability measures

5 Data on the discontinuation for any reason (tolerability) and the numbers of discontinuation due to adverse  
6 events (AEs) (safety) were included in the analysis.

#### 7 QoL and functioning measures

8 QoL can be assessed by study-designed questionnaires and disease-specific or generic instruments. These  
9 instruments assess an individual's physical, emotional, psychological, and social health.<sup>26, 27</sup> We selected  
10 the Short Form 36 Health Survey (SF-36)<sup>28</sup> scores as the outcome indicator for QoL to preserve sufficient  
11 homogeneity for meta-analysis, because this instrument is used to measure QoL for the GAD population in  
12 many studies. The Sheehan Disability Scale (SDS),<sup>29</sup> a reliable, valid, brief, self-report scale that assesses  
13 disability in work, social, and family life, is the only measure of functional impairment employed by the  
14 trials included in this meta-analysis.

#### 15 **Data Extraction**

16 Two independent reviewers (BQ and WG) extracted the following data from the included studies: (a)  
17 baseline characteristics of enrolled patients, (b) general characteristics of the study design, (c) information  
18 on efficacy, safety, tolerability, QoL, and functioning outcome. Data were summarized by one investigator  
19 and checked by a second reviewer. Any discrepant data were, again, examined by a third reviewer (MY), to  
20 ensure accurate data were obtained.

#### 21 **Risk of Bias Assessment**

22 The risk of bias within each study was assessed by two independent reviewers (BQ and WG) using the  
23 Cochrane Risk of Bias assessment tool, as described in the Cochrane Handbook for Systematic Reviews of  
24 Interventions 5.1.0.<sup>24</sup> This tool classifies the studies as having low, unclear, or high risk of bias across six  
25 domains: sequence generation, allocation concealment, blinding, missing data, selective reporting, and  
26 other biases.

#### 27 **Data Analysis**

28 The meta-analysis was conducted using RevMan 5.3 software (Cochrane Collaboration, London, UK) and  
29 Stata 13.0 software (StataCorp LP, College Station, TX, USA). Odds ratios (ORs) and 95% CIs were used  
30 to assess binary outcomes, such as response and remission rates, as well as discontinuation for any reason  
31 rates. In addition, we converted continuous data to standardized mean differences (SMDs) and 95% CIs.

1 The statistical heterogeneity among trials was measured by Q statistics and the  $I^2$  test. Higher  $I^2$  values  
2 indicate greater heterogeneity, with  $I^2$  values of 25, 50, and 75% signifying mild, moderate, and high  
3 heterogeneity, respectively.<sup>30,31</sup> Based on heterogeneity, data were pooled to estimate the overall effect of  
4 all the interventions by random-effect or fixed-effect modelling. Sensitivity analyses were performed to test  
5 the impact robustness of every single study on the overall results. Publication bias could be assessed by  
6 visual inspection of a funnel plot, and the Egger test was used to evaluate publication biases. However,  
7 according to Egger and colleagues, assessing publication bias using the funnel plot-based methods is not  
8 reliable when fewer than 10 pooled studies are used in the direct comparison.<sup>32</sup>

## 9 10 **Results**

### 11 **Search results**

12 We identified 94 references from the electronic literature search. After screening the titles and abstracts, 85  
13 were excluded because they failed to meet the inclusion criteria. By reading the full text of the remaining  
14 nine articles, five more were excluded: one study included patients with depression, one study focused on  
15 vortioxetine in the prevention of relapse of GAD, another one constituted a conference abstract and did not  
16 provide treatment outcomes, and two studies were eliminated because they were review articles.  
17 Ultimately, only four studies that fully satisfied the pre-established inclusion criteria of this meta-analysis  
18 were included<sup>8-11</sup> (see e-Figure 1).

### 19 20 **Study Characteristics**

21 Four included studies were published between 2012 and 2014 (Table 1).<sup>8-11</sup> The collective patient  
22 population comprised 1074 individuals in the vortioxetine group and 613 individuals in the placebo group.  
23 The administered doses of vortioxetine were 2.5, 5, and 10 mg/day. The mean age of participants ranged  
24 from 36.8 to 45.3 years. All studies were characterized by a preponderance of female subjects, with  
25 proportions ranging from 60 to 70%. The main characteristics of these studies are presented in Table 1.

### 26 27 **Study Quality**

28 The risks of bias in each study is summarized in e-Figure 2. All studies claimed randomization and three  
29 articles described the method of random sequence generation (random number table, computer generated).  
30 Three trials provided information that allowed us to assess whether an adequate concealment of the  
31 allocation procedure was used. All studies reported the blinding of participants. Therefore, all trials were  
32 deemed to have a mild-to-moderate risk of bias.

### 33 34 **Efficacy**

35 In terms of response, a total of four studies were included in the analysis; the overall ORs observed for  
36 groups treated with multiple doses (2.5, 5, and 10 mg/day) of vortioxetine compared to placebo were 1.16  
37 (95% CI=0.84–1.60, Z=0.89, P=0.38), 1.41 (95% CI=0.82–2.41, Z=1.25, P=0.21), and 1.05 (95% CI=0.76–



1 1.46,  $Z=0.32$ ,  $P=0.75$ ), respectively (Figure 1). The results showed that there was no statistically significant  
2 difference in the response rates among the vortioxetine- and placebo groups. In addition, there was no  
3 statistically significant difference for the remission rates in multiple doses (2.5, 5, and 10 mg/d) of  
4 vortioxetine compared to placebo (Figure 2).

5  
6 Pooled effect sizes for the mean change from baseline in total scores on the HAM-A are provided in Figure  
7 3. The overall SMDs observed for the groups treated with multiple doses (2.5, 5, and 10 mg/d) of  
8 vortioxetine compared to the placebo were -0.13 (95% CI=-0.29-0.03,  $Z=1.56$ ,  $P=0.12$ ), -0.15 (95% CI=-  
9 0.48-0.18,  $Z=0.87$ ,  $P=0.38$ ), and -0.08 (95% CI=-0.24-0.08,  $Z=1.01$ ,  $P=0.31$ ), respectively. The results  
10 also showed that there was no statistically significant difference in the mean change from baseline in total  
11 scores on the HAM-A among the vortioxetine and placebo groups.

### 12 13 **Tolerability and safety**

14 No significant difference was observed between the vortioxetine and placebo groups in terms of the  
15 likelihood of discontinuation for any reason (tolerability). The overall ORs observed for the groups treated  
16 with multiple doses (2.5, 5, and 10 mg/day) of vortioxetine compared to the placebo-treated group were  
17 1.03 (95% CI=0.71-1.47,  $Z=0.14$ ,  $P=0.89$ ), 0.87 (95% CI=0.63-1.20,  $Z=0.87$ ,  $P=0.38$ ), and 1.06 (95%  
18 CI=0.74-1.52,  $Z=0.32$ ,  $P=0.75$ ), respectively (e-Figure 3). Additionally, there was no statistically  
19 significant difference in the discontinuation due to AEs (safety) between the groups treated with multiple  
20 doses (2.5, 5, and 10 mg/day) of vortioxetine and the group treated with placebo (e-Figure 4).

### 21 22 **Quality of life and functional status results**

23 Three studies in this analysis reported SF-36 scores as the outcome measure of QoL. The overall SMDs of  
24 groups treated with multiple doses (2.5, 5, and 10 mg/d) of vortioxetine compared to placebo were 0.12  
25 (95% CI=-0.11-0.35,  $Z=1.04$ ,  $P=0.30$ ), 0.22 (95% CI=-0.12-0.56,  $Z=1.26$ ,  $P=0.21$ ), and 0.09 (95% CI=-  
26 0.14-0.32,  $Z=0.75$ ,  $P=0.45$ ), respectively (Figure 4). The results showed that there was no statistically  
27 significant difference in SF-36 scores among the different groups. SDS scores were available for all four  
28 studies included in this analysis. The overall SMDs for the groups treated with multiple doses (2.5, 5, and  
29 10 mg/d) of vortioxetine compared to placebo were -0.11 (95% CI=-0.30-0.08,  $Z=1.09$ ,  $P=0.28$ ), -0.10  
30 (95% CI=-0.27-0.06,  $Z=1.27$ ,  $P=0.21$ ), and -0.20 (95% CI=-0.39-0.00,  $Z=2.00$ ,  $P=0.05$ ), respectively  
31 (Figure 5). The results showed that there was no statistically significant difference in SDS among the  
32 different groups.

### 33 34 **Publication bias**

35 The Egger test showed no significant difference main outcomes, indicating no publication bias.

### 36 37 **Discussion**

1  
2  
3 1 In this meta-analysis of 4 randomized trials studying vortioxetine as a treatment for GAD, we found that  
4 2 vortioxetine (2.5-, 5- and 10-mg once-daily doses) did not significantly improve GAD symptoms and  
5 3 quality of life/ functional status compared to a placebo treatment. However, vortioxetine might be safe and  
6 4 well tolerated in this patient population. Our findings have some clinical implications for comprehensively  
7 5 understanding the risk–benefit profiles of vortioxetine treatment for GAD.

8  
9  
10 6 Our results are not consistent with those of the previous meta-analysis conducted by Pae et al, as that  
11 7 study found that vortioxetine was significantly more effective than the placebo.<sup>13</sup> In their study, they only  
12 8 performed the analysis of mean change from baseline in total scores on the HAM-A, and included all  
13 9 randomized subjects. However, our meta-analysis was separately conducted according to the doses of  
14 10 vortioxetine, and we assessed the efficacy in terms of mean change from baseline in total scores on the  
15 11 HAM-A, response rates, and remission rates. Doses of vortioxetine may be clinically important factors for  
16 12 its efficacy in GAD patients. Thus, the results of our meta-analysis were more reliable and stable.

17  
18  
19 13 Moreover, a recent meta-analysis showed that there was no statistically significant difference regarding the  
20 14 response rates among groups treated with either multiple doses (2.5, 5, and 10 mg/day) of vortioxetine or a  
21 15 placebo.<sup>33</sup> Furthermore, the results of our meta-analysis demonstrated no statistically significant difference  
22 16 in the mean change from baseline in total scores on the HAM-A, remission rates, quality of life, and  
23 17 functional status among the groups. Thus, the results of our meta-analysis were more comprehensive.

24  
25  
26 18 Several reasons for these outcomes may have contributed to the negative results. A previous analysis of  
27 19 the Food and Drug Administration database concluded that negative results are commonly seen in  
28 20 anxiolytic agents administered for the treatment of anxiety disorders, including GAD, where less than one-  
29 21 half (48%) of the treatment arms were statistically superior to the placebo.<sup>34</sup> In this case, all anxiolytic  
30 22 agents included in the study are approved for GAD treatment in the United States, but only three out of  
31 23 seven treatment arms were separated from the placebo. Moreover, the results some studies have found that  
32 24 negative results<sup>9–11</sup> had a higher placebo response rate than those with positive results.<sup>8,35</sup> Although this  
33 25 correlation has not been established in GAD, it is reasonable to speculate that an elevated placebo response  
34 26 could reduce the treatment effect. Unfortunately, because no positive control was included in our meta-  
35 27 analysis, it is impossible to determine the lack-of-treatment effect. In addition, the racial diversity may have  
36 28 introduced differences in response and remission rates; for example, the studied population of the trial that  
37 29 showed negative results was racially diverse, whereas the population of the trial that showed positive  
38 30 results was almost entirely Caucasian. Hence, the results of the STAR\*D study demonstrate that non-  
39 31 Caucasians were significantly less likely to achieve remission.<sup>36</sup> Furthermore, the mean baseline HAM-A  
40 32 total scores in most of the included studies were relatively high (ranging from 24.5 to 27); inflated baseline  
41 33 HAM-A total scores are a possible consequence of less stringent screening practices. However, it is  
42 34 unlikely that any single reason can explain the inconsistent results observed in the vortioxetine for GAD.

43  
44  
45 35 Although our meta-analysis did not demonstrate a statistically significant anxiolytic effect of  
46 36 vortioxetine, it did provide information regarding drug tolerability. Our study found that there was no  
47 37 statistically significant difference for the discontinuation for any reason rates and discontinuation due to

1  
2  
3 1 AEs rates among groups receiving either multiple doses (2.5, 5, and 10 mg/day) of vortioxetine compared  
4 2 to placebo, which is similar to the findings of a previous meta-analysis.<sup>5,13</sup> Thus, the vortioxetine doses  
5 3 were well tolerated, and were associated with similar discontinuation for any reason rates and  
6 4 discontinuation due to AEs rates when compared to the placebo.

9 5 GAD is associated with significant functional impairment in many areas, including social, occupational,  
10 6 and mental consequences; and when combined with physical impairment, together they influence QoL. The  
11 7 effectiveness of GAD treatment for improving QoL and functional outcomes is potentially confounded by  
12 8 the bidirectional relationship of anxiety symptoms and QoL/functional impairment. This is the first meta-  
13 9 analysis to report prospective assessment of QoL/functional status impairment in patients with GAD.  
14 10 Unfortunately, our meta-analysis of randomized controlled trials with GAD patients showed no significant  
15 11 improvement in the aforementioned aspects after vortioxetine treatment compared to after treatment with  
16 12 the placebo. Our results are not consistent with those of a previous meta-analysis of the effect of  
17 13 vortioxetine treatment on overall functioning in patients with MDD.<sup>37</sup> The meta-analysis, conducted by  
18 14 Florea et al, demonstrated that vortioxetine, in doses of 5-20 mg for 6/8 weeks, improved overall  
19 15 functioning in patients with MDD. Relative to placebo, vortioxetine treatment, in doses of 10 and 20 mg,  
20 16 demonstrated significant improvement in SDS total score and functional remission. However, the RCTs  
21 17 that were studied, in accordance with those included in our meta-analysis, used the optimal doses of 2.5-10  
22 18 mg. Thus, the reason for the lack of congruence between these two meta-analyses may be the difference in  
23 19 the optimal doses. Meanwhile, a recent meta-analysis of vortioxetine in working patients with GAD,<sup>38</sup>  
24 20 showed that vortioxetine benefits adult patients who are working and/or pursuing an education. Thus,  
25 21 future research should be directed to provide more RCTs, specifically targeted to individuals with GAD, in  
26 22 order to assess the efficacy of vortioxetine in a larger sample, as well as to define the best therapeutic  
27 23 dosage.

28 24 The results of our meta-analysis should be interpreted in light of the following potential limitations.  
29 25 First, we included only four RCTs, which may have influenced the reliability of the results. Second, the  
30 26 duration of each trial included in our meta-analysis was 8 weeks; this is an important issue because GAD  
31 27 patients typically require long-term pharmacological treatment. We found only one study focusing on long-  
32 28 term relapse prevention, which showed no significant improvement of relapse prevention effect after long-  
33 29 term (maintenance) vortioxetine treatment for GAD compared to placebo.<sup>39</sup> In addition, owing to a limited  
34 30 number of studies included in our meta-analysis, we did not compare the onset time between the groups  
35 31 treated with multiple doses of vortioxetine and placebo. Finally, all the included trials were supported by  
36 32 the Takeda Pharmaceutical Company Ltd. as part of a joint clinical development program with H.  
37 33 Lundbeck A/S, which may have also influenced the results.

## 34 35 **Conclusions**

36 36 In summary, GAD is an illness that is characterized not only by severe anxiety symptoms, but also by  
37 37 diminished functioning and QoL. The challenge for interventions is not only to achieve improvement of

1 symptoms, but also to enhance patients' functioning ability and QoL. Our comprehensive evaluation of  
2 efficacy, safety, and impact on QoL provides a critical insight that may be useful for clinicians attempting  
3 to thoroughly understand the risk–benefit profiles of vortioxetine treatment for GAD. Vortioxetine did not  
4 significantly improve GAD symptoms and QoL as compared to the placebo; nevertheless, it was safe and  
5 well tolerated in this patient population. However, our results should be interpreted and translated into  
6 clinical practice with caution, owing to the limited number of RCTs included in the present meta-analysis.

7  
8 **Acknowledgments** We thank Editage (www.editage.cn) for editing the English text of a draft of this  
9 manuscript.

10  
11 **Contributors** BQ, GH, QY and MY were involved in conceptualisation and design of the study and critical  
12 review of the manuscript. BQ, GH and MY performed the data extraction. BQ, MZ, HC and WG conceived  
13 the study and reviewed the manuscript for important intellectual content. All authors approved the final  
14 manuscript as submitted.

15  
16 **Funding** The authors have not declared a specific grant for this research from any funding agency in the  
17 public, commercial or not-for-profit sectors.

18  
19 **Competing interests** None declared.

20  
21 **Patient consent for publication** Not required.

22  
23 **Data sharing statement** Additional data can be requested by emailing lzrmyymx@126.com.

## References

1. American Psychiatric Association. Diagnostic and Statistical Manual of Mental Disorders (DSM-5), Fifth Edition. Washington, DC: American Psychiatric Association; 2013.
2. Tyrer P, Baldwin D. Generalised anxiety disorder. *Lancet* 2006; 368: 2156-2166.
3. Cuijpers P, Sijbrandij M, Koole S, et al. Psychological treatment of generalized anxiety disorder: a meta-analysis. *Clin Psychol Rev* 2014; 34: 130-140.
4. Yonkers KA, Dyck IR, Warshaw M, et al. Factors predicting the course of generalised anxiety disorder. *Br J Psychiatry* 2000; 176: 544-549.
5. Pae CU, Wang SM, Han C, et al. Vortioxetine: a meta-analysis of 12 short-term, randomized, placebo-controlled clinical trials for the treatment of major depressive disorder. *J Psychiatry Neurosci* 2015; 40: 174-186.
6. Berhan A, Barker A. Vortioxetine in the treatment of adult patients with major depressive disorder: a meta-analysis of randomized double-blind controlled trials. *BMC Psychiatry* 2014; 14: 276.
7. Fu J, Chen Y. The efficacy and safety of 5 mg/d vortioxetine compared to placebo for major depressive disorder: a meta-analysis. *Psychopharmacology (Berl)* 2015; 232: 7-16.
8. Bidzan L, Mahableshwarkar AR, Jacobsen P, et al. Vortioxetine (Lu AA21004) in generalized anxiety disorder: results of an 8-week, multinational, randomized, double-blind, placebo-controlled clinical trial. *Eur Neuropsychopharmacol* 2012; 22: 847-857.
9. Mahableshwarkar AR, Jacobsen PL, Serenko M, et al. A randomized, double-blind, fixed-dose study comparing the efficacy and tolerability of vortioxetine 2.5 and 10mg in acute treatment of adults with generalized anxiety disorder. *Hum Psychopharmacol* 2014; 29: 64-72.
10. Mahableshwarkar AR, Jacobsen PL, Chen Y, et al. A randomised, double-blind, placebo controlled, duloxetine-referenced study of the efficacy and tolerability of vortioxetine in the acute treatment of adults with generalised anxiety disorder. *Int J Clin Pract* 2014; 6: 49-59.
11. Rothschild AJ, Mahableshwarkar AR, Jacobsen P, et al. Vortioxetine (Lu AA21004) 5 mg in generalized anxiety disorder: results of an 8-week randomized, double-blind, placebo-controlled clinical trial in the United States. *Eur Neuropsychopharmacol* 2012; 22: 858-866.

- 1 12. Baldwin DS, Florea I, Jacobsen PL, et al. A meta-analysis of the efficacy of vortioxetine in patients  
2 with major depressive disorder (MDD) and high levels of anxiety symptoms. *J Affect Disord* 2016;  
3 206: 140-150.
- 4 13. Pae CU, Wang SM, Han C, et al. Vortioxetine, multimodal antidepressant for generalized anxiety  
5 disorder: a systematic review and meta-analysis. *J Psychiatr Res* 2015; 64: 88-98.
- 6 14. Yee A, Ng CG, Seng LH. Vortioxetine Treatment for Anxiety Disorder: A Meta-Analysis Study.  
7 *Curr Drug Targets* 2017; 19: 1412-1423.
- 8 15. Fu J, Peng L, Li X. The efficacy and safety of multiple doses of vortioxetine for generalized anxiety  
9 disorder: a meta-analysis. *Neuropsychiatr Dis Treat* 2016; 12: 951-959.
- 10 16. Bourland SL, Stanley MA, Synder AG, et al. Quality of life in older adults with generalized anxiety  
11 disorder. *Aging. And Mental Health* 2000; 4: 315-323.
- 12 17. Frisch MB. Manual and treatment guide for the Quality of Life Inventory. Minneapolis: National  
13 Computer Systems Inc; 1994.
- 14 18. Katschnig H. How useful is the concept of quality of life in psychiatry? In: Katschnig H, Freeman  
15 H, Sartorius N. (Editors), *Quality of life in mental disorders*. Chichester: Wiley; 1997. p 3-16.
- 16 19. Steven EH. Bridging science and service: A report by the National Advisory Mental Health  
17 Council's Clinical Treatment and Services Research Workgroup (NIH Publication No. 99-4353).  
18 Rockville: Diane Pub Co; 1999.
- 19 20. Zhou X, Keitner GI, Qin B, et al. Atypical Antipsychotic Augmentation for Treatment-Resistant  
20 Depression: A Systematic Review and Network Meta-Analysis. *Int J Neuropsychopharmacol* 2015;  
21 18: pyv060.
- 22 21. Mogotsi M, Kaminer D, Stein DJ. Quality of life in the anxiety disorders. *Harvard Rev Psychiat*  
23 2000; 8: 273-282.
- 24 22. Henning ER, Turk CL, Mennin DS, et al. Impairment and quality of life in individuals with  
25 generalized anxiety disorder. *Depress Anxiety* 2007; 24: 342-349.
- 26 23. Endicott J, Russell JM, Raskin J, et al. Duloxetine treatment for role functioning improvement in  
27 generalized anxiety disorder: three independent studies. *J Clin Psychiatry* 2007; 68: 518-524.
- 28 24. Higgins JPT, Green S. *Cochrane Handbook for Systematic Reviews of Interventions Version 5.1.0*

- 1 updated March 2011. Available at: <http://www.cochrane-handbook.org>. Accessed November 13,  
2 2018.
- 3 25. Moher D, Liberati A, Tetzlaff J, et al. Reprint--preferred reporting items for systematic reviews and  
4 meta-analyses: the PRISMA statement. *Phys Ther* 2009; 89: 873-880.
- 5 26. Testa MA, Simonson DC. Assessment of quality-of-life outcomes. *N Engl J Med* 1996; 334: 835-  
6 840.
- 7 27. Urbach DR. Measuring quality of life after surgery. *Surg Innov* 2005; 12: 161-165.
- 8 28. Ware JE Jr, Sherbourne CD. The MOS 36-item short-form health survey (SF-36). *Med Care* 1992;  
9 30: 473-483.
- 10 29. Sheehan DV, Harnett-Sheehan K, Raj BA. The measurement of disability. *Int Clin*  
11 *Psychopharmacol* 1996; 11: 89-95.
- 12 30. Higgins J, Thompson S, Deeks J, et al. Statistical heterogeneity in systematic reviews of clinical  
13 trials: a critical appraisal of guideline and practice. *J Health Serv Res Policy* 2002; 7: 51-61.
- 14 31. Higgins JP, Thompson SG, Deeks JJ, et al. Measuring inconsistency in meta-analyses. *BMJ* 2003;  
15 327: 557-660.
- 16 32. Egger M, Davey Smith G, et al. Bias in meta-analysis detected by a simple, graphical test. *BMJ*  
17 1997; 315: 629-634.
- 18 33. Fu J, Peng L, Li X. The efficacy and safety of multiple doses of vortioxetine for generalized anxiety  
19 disorder: a meta-analysis. *Neuropsychiatr Dis Treat* 2016; 12: 951-959.
- 20 34. Khan A, Khan S, Brown WA. Are placebo controls necessary to test new antidepressants and  
21 anxiolytics? *Int J Neuropsychopharmacol* 2002; 5: 193-197.
- 22 35. Liebowitz MR, Stein MB, Tancer M, et al. A randomized, double-blind, fixed-dose comparison of  
23 paroxetine and placebo in the treatment of generalized social anxiety disorder. *J Clin Psychiatry*.  
24 2002;63(1): 66-74.
- 25 36. Trivedi MH, Rush AJ, Wisniewski SR, et al. Evaluation of outcomes with citalopram for depression  
26 using measurement-based care in STAR\*D: implications for clinical practice. *Am J Psychiatry*  
27 2006; 163(1): 28-40.
- 28 37. Florea I, Loft H, Danchenko N, et al. The effect of vortioxetine on overall patient functioning in

- 1 patients with major depressive disorder. *Brain Behav* 2017; 7: e00622.
- 2 38. Christensen MC, Loft H, Florea I, et al. Efficacy of vortioxetine in working patients with  
3 generalized anxiety disorder. *CNS Spectr* 2017. [https://doi: 10.1017/S1092852917000761](https://doi.org/10.1017/S1092852917000761).
- 4 39. Baldwin DS, Loft H, Florea I. Lu AA21004, a multimodal psychotropic agent, in the prevention of  
5 relapse in adult patients with generalized anxiety disorder. *Int Clin Psychopharmacol* 2012; 27: 197-  
6 207.2

For peer review only



1  
2  
3  
4  
5 **Table 1. Description of included studies.**

| 6 Study                                         | 7 Patients n                | 8 Age (mean, SD)                                                            | 9 Sex (Male, n, %)                                            | 10 Interventions                                              | 11 Duration (weeks) | 12 Key inclusion criteria for GAD |
|-------------------------------------------------|-----------------------------|-----------------------------------------------------------------------------|---------------------------------------------------------------|---------------------------------------------------------------|---------------------|-----------------------------------|
| 13 Bidzan et al. (2012) <sup>8</sup>            | T: 150;<br>C: 151           | T: 45.0 (14.1);<br>C: 45.3 (13.5)                                           | T: 47 (31.3);<br>C: 58 (38.4)                                 | T: vtx (5 mg/d);<br>C: placebo                                | 8                   | DSM-IV-TR,<br>HAM-A $\geq$ 20     |
| 14 Mahableshwarkar et al. (2014a) <sup>9</sup>  | T: 152, 152;<br>C: 153      | T: 40.8 (13.8);<br>C: 43.3 (15.0);<br>C: 39.5 (13.5)                        | T: 49 (32.2),<br>C: 56 (36.8);<br>C: 48 (31.4)                | T: vtx 2.5 mg/d,<br>vtx 10 mg/d;<br>C: placebo                | 8                   | DSM-IV-TR,<br>HAM-A $\geq$ 20     |
| 15 Mahableshwarkar et al. (2014b) <sup>10</sup> | T: 156, 156, 156;<br>C: 157 | T: 39.2 (11.90),<br>C: 37.7 (11.96),<br>C: 39.8 (12.33);<br>C: 36.8 (12.12) | T: 47 (30.1),<br>C: 56 (35.9),<br>C: 51 (32.7);<br>C: 55 (35) | T: vtx 2.5 mg/d,<br>vtx 5 mg/d,<br>vtx 10 mg/d;<br>C: placebo | 8                   | DSM-IV-TR,<br>HAM-A $\geq$ 20     |
| 16 Rothschild et al. (2012) <sup>11</sup>       | T: 152;<br>C: 152           | T: 41.0 (14.05);<br>C: 41.4 (12.81)                                         | T: 49 (32.2);<br>C: 55 (36.2)                                 | T: vtx 5 mg/d;<br>C: placebo                                  | 8                   | DSM-IV-TR,<br>HAM-A $\geq$ 20     |

17 Note: T, Treatment group; C, Control group; mg/d, mg/day; GAD, Generalized anxiety disorder; DSM-IV-TR,  
18 Diagnostic and Statistical Manual of Mental Disorders, 4th edition Text Revision; HAM-A, Hamilton Anxiety  
19 Rating; vtx, Vortioxetine.  
20  
21  
22  
23  
24  
25  
26  
27  
28  
29  
30  
31  
32  
33  
34  
35  
36  
37  
38  
39  
40  
41  
42  
43  
44  
45  
46  
47  
48  
49  
50  
51  
52  
53  
54  
55  
56  
57  
58  
59  
60

Figure legends

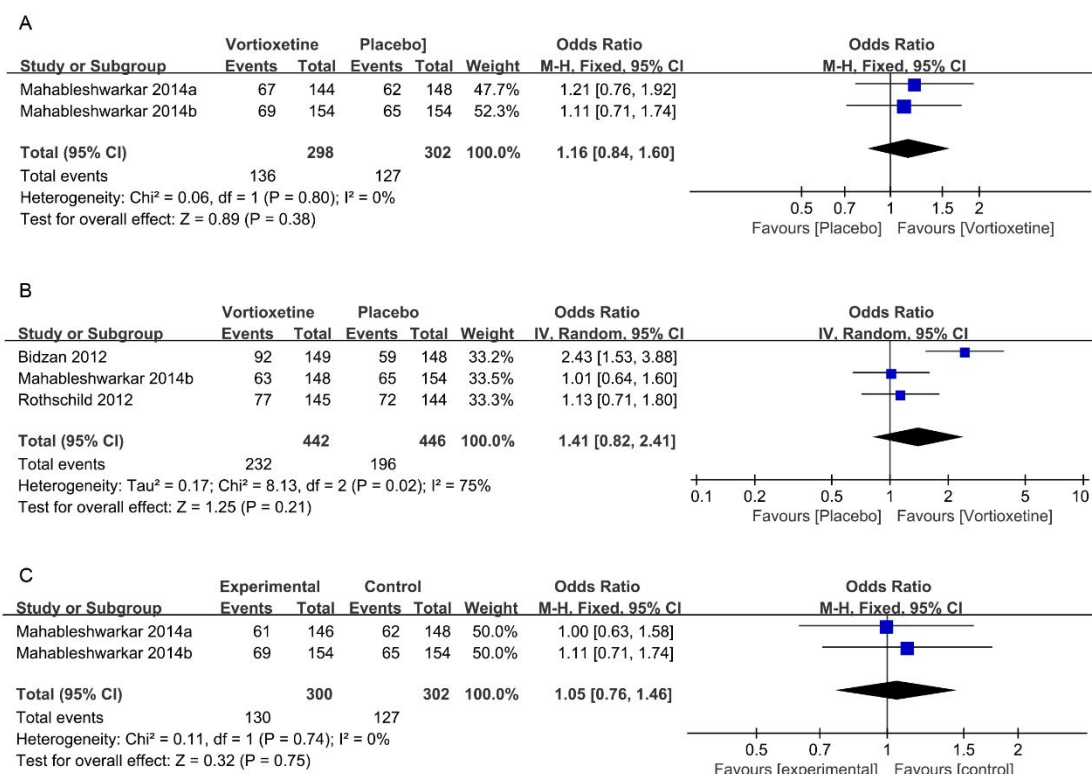

**Figure 1:** Odds ratios (ORs) and 95% confidence intervals (CIs) of the individual studies and the pooled data, comparing the response rates between the vortioxetine-treated and placebo groups. Notes: (A) 2.5-mg/day vortioxetine versus placebo, (B) 5-mg/day vortioxetine versus placebo, and (C) 10-mg/day vortioxetine versus placebo.

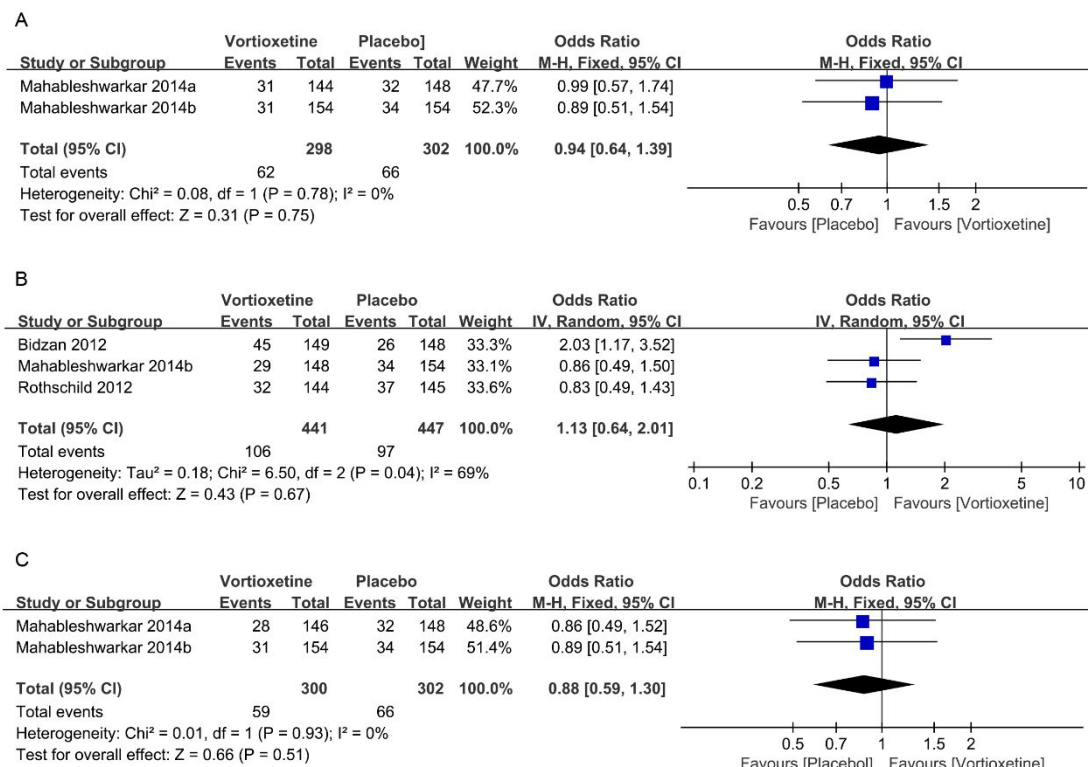

**Figure 2:** Odds ratios (ORs) and 95% confidence intervals (CIs) of the individual studies and the pooled data, comparing the remission rates between the vortioxetine- and placebo groups.

Notes: (A) 2.5-mg/day vortioxetine versus placebo, (B) 5-mg/day vortioxetine versus placebo, and (C) 10-mg/day vortioxetine versus placebo.

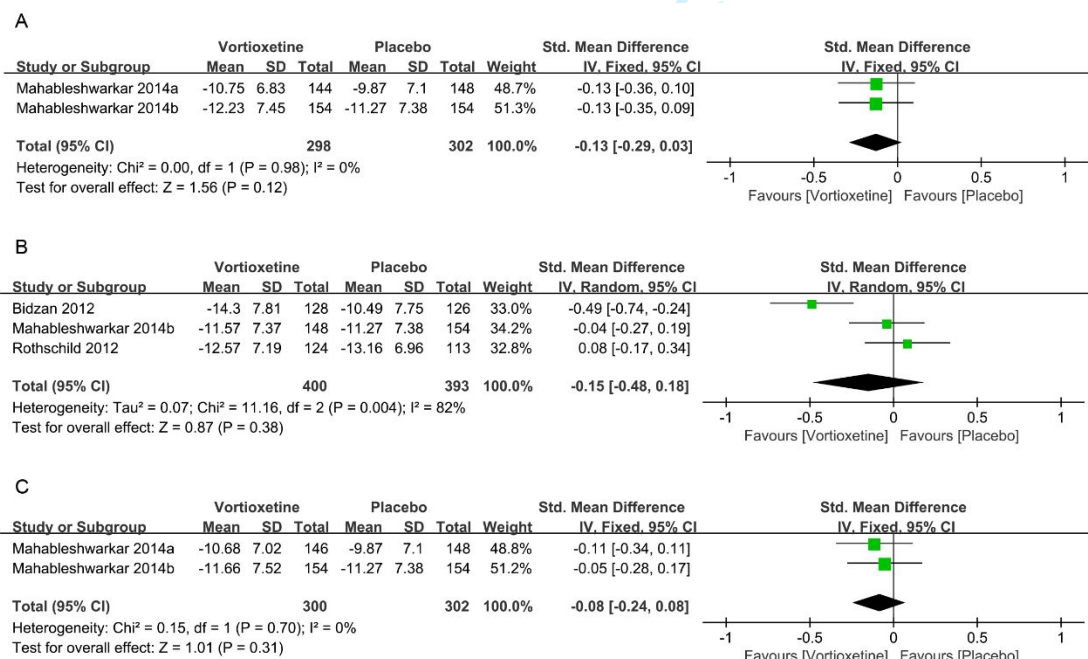

**Figure 3:** Standardized mean differences (SMDs) and 95% confidence intervals (CIs) of the individual

studies and the pooled data, comparing the mean change from baseline in total scores on the HAM-A, between the vortioxetine- and placebo groups.

Notes: (A) 2.5-mg/day vortioxetine versus placebo, (B) 5-mg/day vortioxetine versus placebo, and (C) 10-mg/day vortioxetine versus placebo.

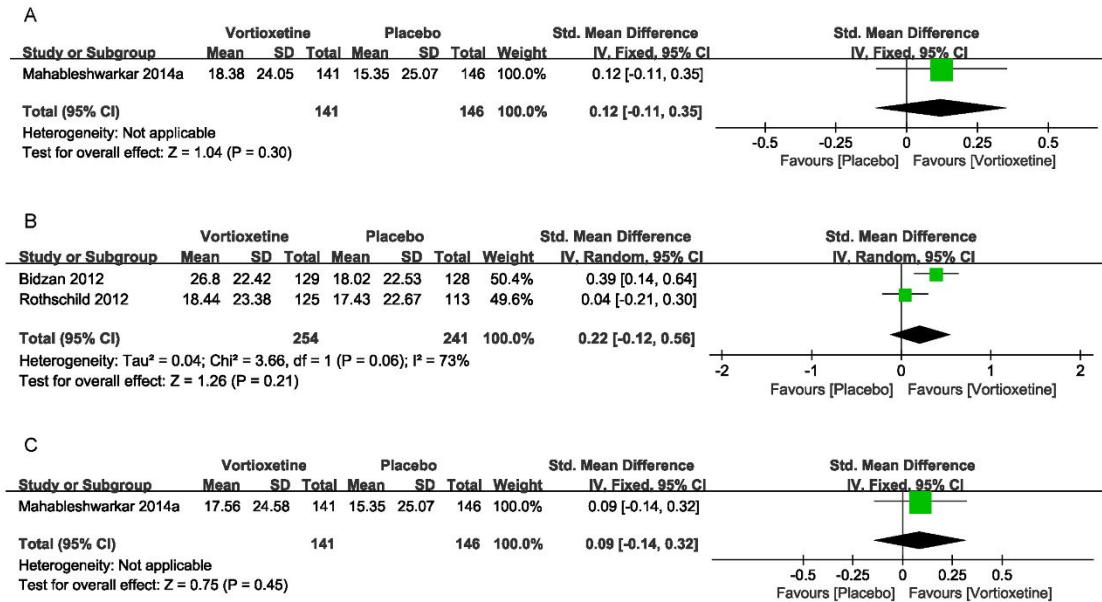

**Figure 4:** Standardized mean differences (SMDs) and 95% confidence intervals (CIs) of the individual studies and the pooled data, comparing the Short Form 36 Health Survey (SF-36) scores between the vortioxetine- and placebo groups.

Notes: (A) 2.5-mg/day vortioxetine versus placebo, (B) 5-mg/day vortioxetine versus placebo, and (C) 10-mg/day vortioxetine versus placebo.

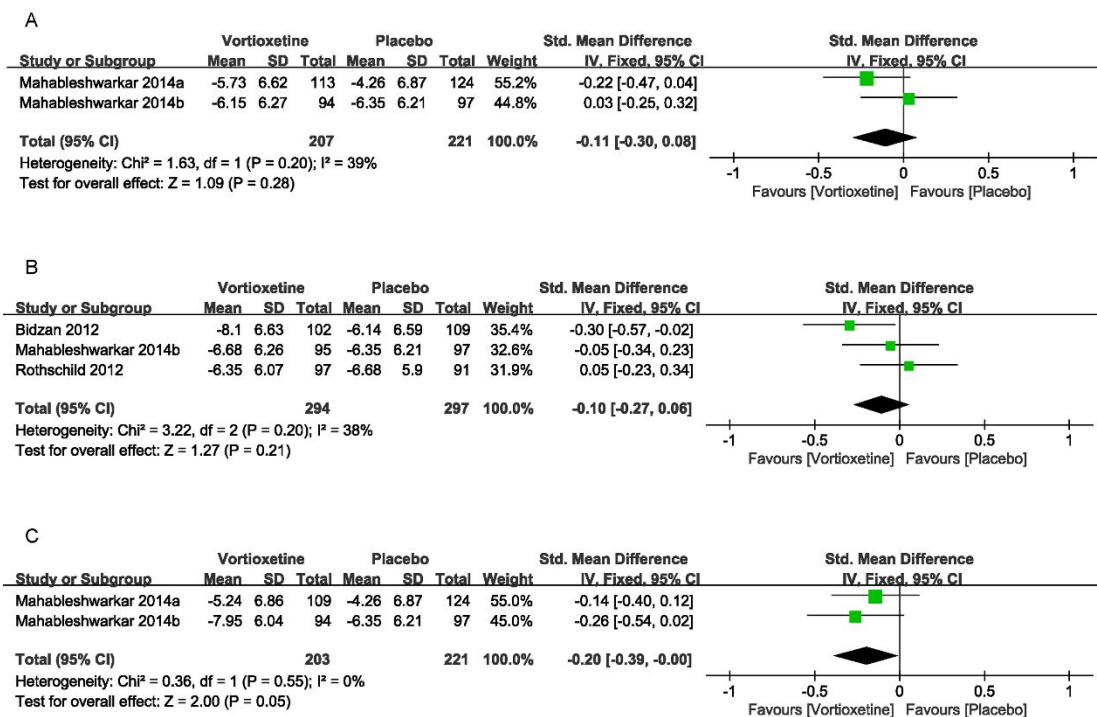

**Figure 5:** Standardized mean differences (SMDs) and 95% confidence intervals (CIs) of the individual studies and the pooled data, comparing the Sheehan Disability Scale (SDS) scores between the vortioxetine and placebo groups.

Notes: (A) 2.5-mg/day vortioxetine versus placebo, (B) 5-mg/day vortioxetine versus placebo, and (C) 10-mg/day vortioxetine versus placebo.

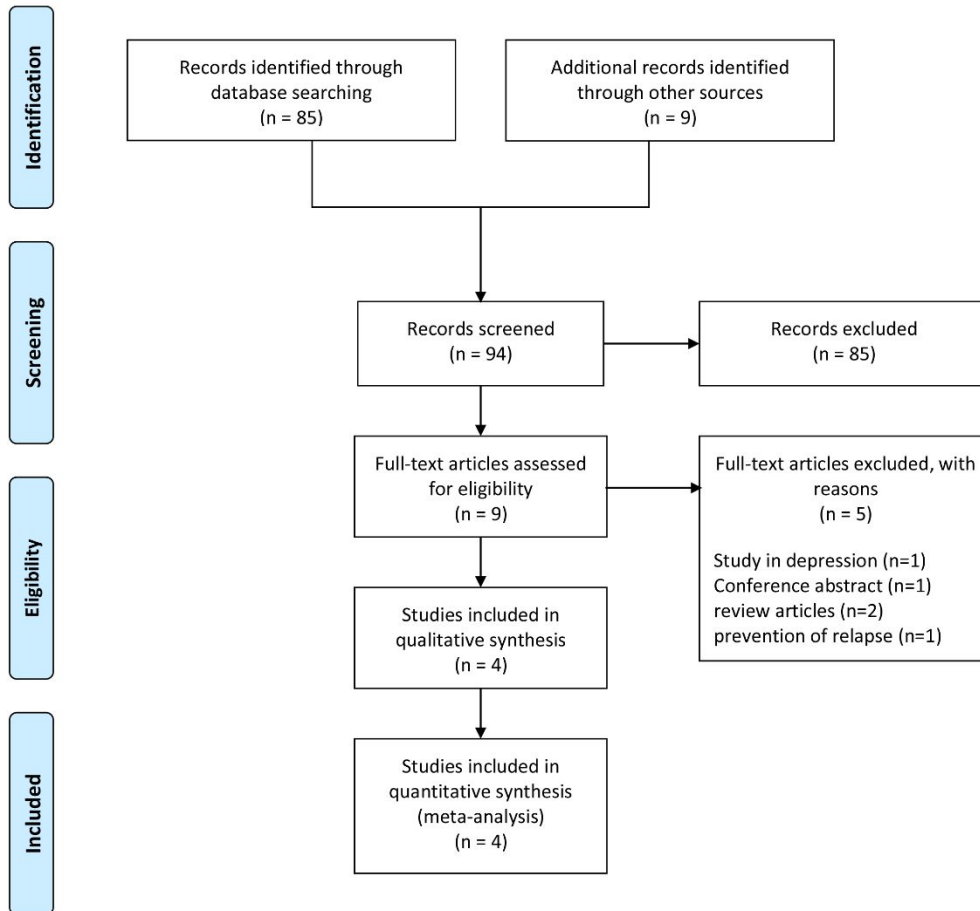

**e-Figure 1:** Search flow for the trial identification and selection process.

1  
2  
3  
4  
5  
6  
7  
8  
9  
10  
11  
12  
13  
14  
15  
16  
17  
18  
19  
20  
21  
22  
23  
24  
25  
26  
27  
28  
29  
30  
31  
32  
33  
34  
35  
36  
37  
38  
39  
40  
41  
42  
43  
44  
45  
46  
47  
48  
49  
50  
51  
52  
53  
54  
55  
56  
57  
58  
59  
60

|                       | Random sequence generation (selection bias) | Allocation concealment (selection bias) | Blinding of participants and personnel (performance bias) | Incomplete outcome data (attrition bias) | Selective reporting (reporting bias) | Other bias |
|-----------------------|---------------------------------------------|-----------------------------------------|-----------------------------------------------------------|------------------------------------------|--------------------------------------|------------|
| Bidzan 2012           | ?                                           | ?                                       | +                                                         | +                                        | +                                    | ?          |
| Mahableshwarkar 2014a | ?                                           | ?                                       | +                                                         | +                                        | +                                    | ?          |
| Mahableshwarkar 2014b | +                                           | +                                       | +                                                         | +                                        | +                                    | ?          |
| Rothschild 2012       | +                                           | +                                       | +                                                         | +                                        | +                                    | ?          |

**e-Figure 2:** Summarized risks of bias for the included studies.

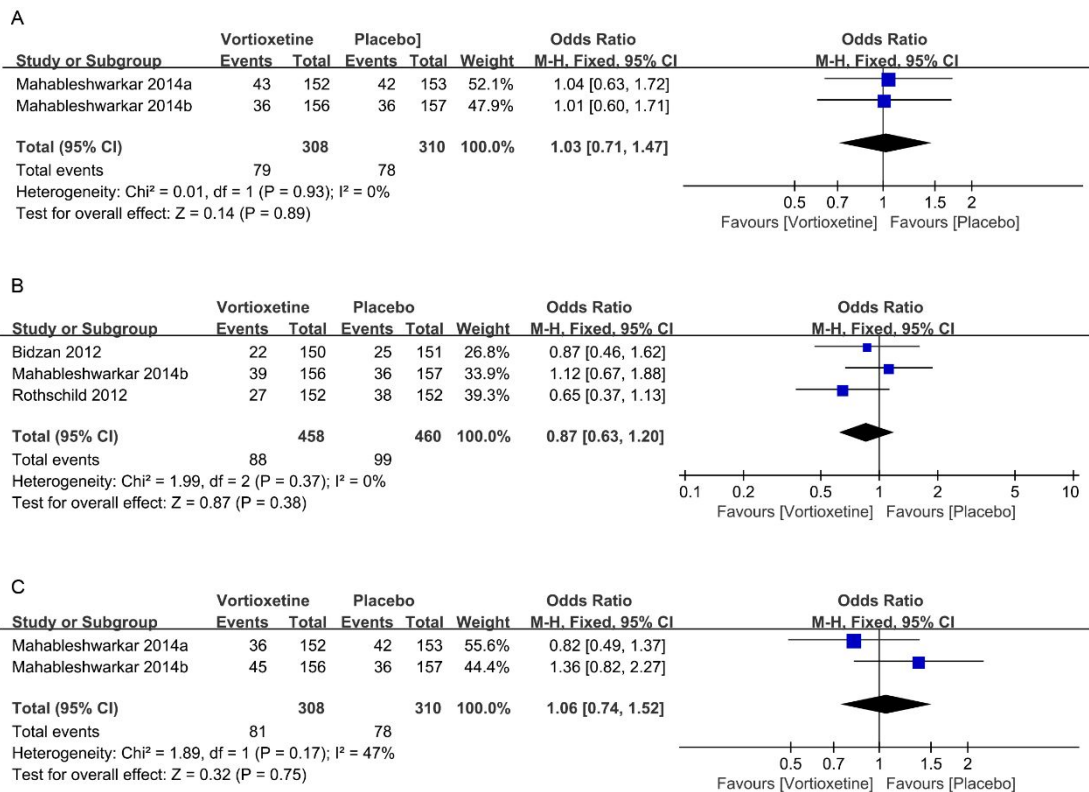

**e-Figure 3:** Odds ratios (ORs) and 95% confidence intervals (CIs) of the selected studies and the pooled data, comparing the discontinuation rates for any reason, between the vortioxetine and placebo groups.

Notes: (A) 2.5-mg/day vortioxetine versus placebo, (B) 5-mg/day vortioxetine versus placebo, and (C) 10-mg/day vortioxetine versus placebo.



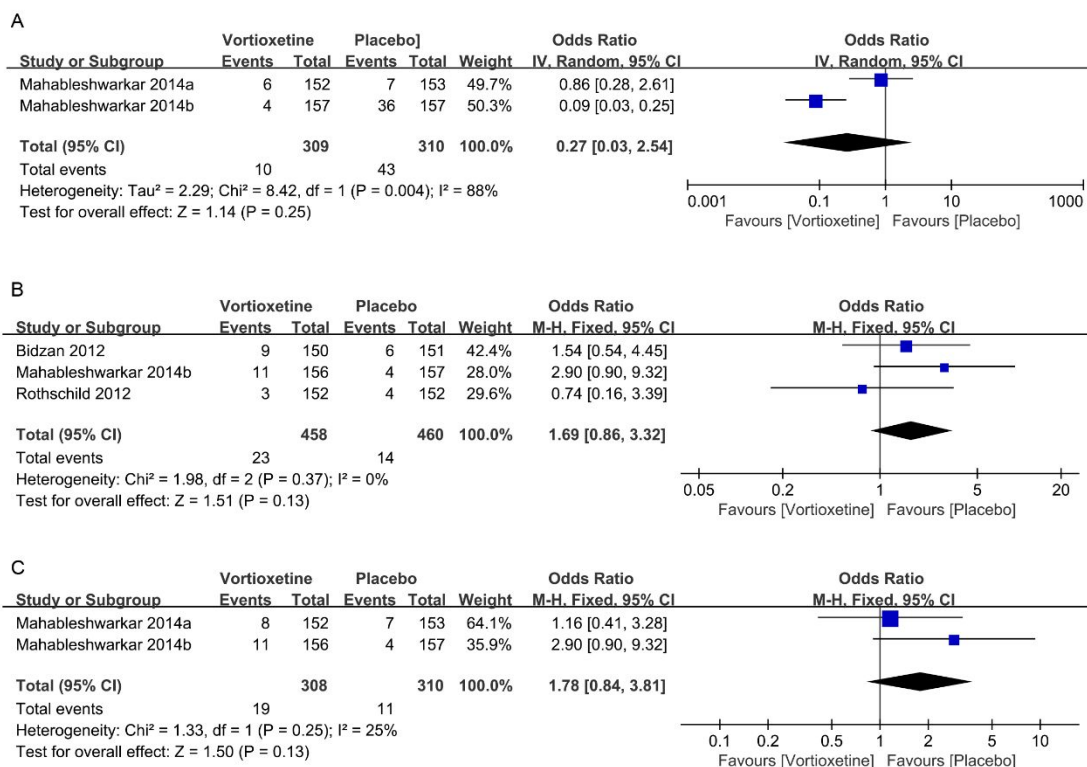

**e-Figure 4:** Odds ratios (ORs) and 95% confidence intervals (CIs) of the selected studies and the pooled data, comparing the discontinuation rates due to adverse events (AEs), between vortioxetine and placebo groups.

Notes: (A) 2.5-mg/day vortioxetine versus placebo, (B) 5-mg/day vortioxetine versus placebo, and (C) 10-mg/day vortioxetine versus placebo.

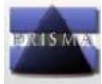

# PRISMA 2009 Checklist

1  
2  
3  
4  
5  
6  
7  
8  
9  
10  
11  
12  
13  
14  
15  
16  
17  
18  
19  
20  
21  
22  
23  
24  
25  
26  
27  
28  
29  
30  
31  
32  
33  
34  
35  
36  
37  
38  
39  
40  
41  
42  
43  
44  
45  
46  
47

| Section/topic                      | #  | Checklist item                                                                                                                                                                                                                                                                                              | Reported on page # |
|------------------------------------|----|-------------------------------------------------------------------------------------------------------------------------------------------------------------------------------------------------------------------------------------------------------------------------------------------------------------|--------------------|
| <b>TITLE</b>                       |    |                                                                                                                                                                                                                                                                                                             |                    |
| Title                              | 1  | Identify the report as a systematic review, meta-analysis, or both.                                                                                                                                                                                                                                         | 1                  |
| <b>ABSTRACT</b>                    |    |                                                                                                                                                                                                                                                                                                             |                    |
| Structured summary                 | 2  | Provide a structured summary including, as applicable: background; objectives; data sources; study eligibility criteria, participants, and interventions; study appraisal and synthesis methods; results; limitations; conclusions and implications of key findings; systematic review registration number. | 2                  |
| <b>INTRODUCTION</b>                |    |                                                                                                                                                                                                                                                                                                             |                    |
| Rationale                          | 3  | Describe the rationale for the review in the context of what is already known.                                                                                                                                                                                                                              | 3                  |
| Objectives                         | 4  | Provide an explicit statement of questions being addressed with reference to participants, interventions, comparisons, outcomes, and study design (PICOS).                                                                                                                                                  | 3-4                |
| <b>METHODS</b>                     |    |                                                                                                                                                                                                                                                                                                             |                    |
| Protocol and registration          | 5  | Indicate if a review protocol exists, if and where it can be accessed (e.g., Web address), and, if available, provide registration information including registration number.                                                                                                                               | 4                  |
| Eligibility criteria               | 6  | Specify study characteristics (e.g., PICOS, length of follow-up) and report characteristics (e.g., years considered, language, publication status) used as criteria for eligibility, giving rationale.                                                                                                      | 4                  |
| Information sources                | 7  | Describe all information sources (e.g., databases with dates of coverage, contact with study authors to identify additional studies) in the search and date last searched.                                                                                                                                  | 4                  |
| Search                             | 8  | Present full electronic search strategy for at least one database, including any limits used, such that it could be repeated.                                                                                                                                                                               | 4                  |
| Study selection                    | 9  | State the process for selecting studies (i.e., screening, eligibility, included in systematic review, and, if applicable, included in the meta-analysis).                                                                                                                                                   | 4                  |
| Data collection process            | 10 | Describe method of data extraction from reports (e.g., piloted forms, independently, in duplicate) and any processes for obtaining and confirming data from investigators.                                                                                                                                  | 5                  |
| Data items                         | 11 | List and define all variables for which data were sought (e.g., PICOS, funding sources) and any assumptions and simplifications made.                                                                                                                                                                       | 5                  |
| Risk of bias in individual studies | 12 | Describe methods used for assessing risk of bias of individual studies (including specification of whether this was done at the study or outcome level), and how this information is to be used in any data synthesis.                                                                                      | 5                  |
| Summary measures                   | 13 | State the principal summary measures (e.g., risk ratio, difference in means).                                                                                                                                                                                                                               | 5                  |
| Synthesis of results               | 14 | Describe the methods of handling data and combining results of studies, if done, including measures of consistency (e.g., I <sup>2</sup> ) for each meta-analysis.                                                                                                                                          | 5-6                |

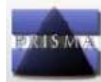

# PRISMA 2009 Checklist

Page 1 of 2

| Section/topic                 | #  | Checklist item                                                                                                                                                                                           | Reported on page # |
|-------------------------------|----|----------------------------------------------------------------------------------------------------------------------------------------------------------------------------------------------------------|--------------------|
| Risk of bias across studies   | 15 | Specify any assessment of risk of bias that may affect the cumulative evidence (e.g., publication bias, selective reporting within studies).                                                             | 5-6                |
| Additional analyses           | 16 | Describe methods of additional analyses (e.g., sensitivity or subgroup analyses, meta-regression), if done, indicating which were pre-specified.                                                         | 5-6                |
| <b>RESULTS</b>                |    |                                                                                                                                                                                                          |                    |
| Study selection               | 17 | Give numbers of studies screened, assessed for eligibility, and included in the review, with reasons for exclusions at each stage, ideally with a flow diagram.                                          | 6                  |
| Study characteristics         | 18 | For each study, present characteristics for which data were extracted (e.g., study size, PICOS, follow-up period) and provide the citations.                                                             | 6                  |
| Risk of bias within studies   | 19 | Present data on risk of bias of each study and, if available, any outcome level assessment (see item 12).                                                                                                | 6                  |
| Results of individual studies | 20 | For all outcomes considered (benefits or harms), present, for each study: (a) simple summary data for each intervention group (b) effect estimates and confidence intervals, ideally with a forest plot. | 6                  |
| Synthesis of results          | 21 | Present results of each meta-analysis done, including confidence intervals and measures of consistency.                                                                                                  | 6-7                |
| Risk of bias across studies   | 22 | Present results of any assessment of risk of bias across studies (see Item 15).                                                                                                                          | 6-7                |
| Additional analysis           | 23 | Give results of additional analyses, if done (e.g., sensitivity or subgroup analyses, meta-regression [see Item 16]).                                                                                    | 6-7                |
| <b>DISCUSSION</b>             |    |                                                                                                                                                                                                          |                    |
| Summary of evidence           | 24 | Summarize the main findings including the strength of evidence for each main outcome; consider their relevance to key groups (e.g., healthcare providers, users, and policy makers).                     | 7-9                |
| Limitations                   | 25 | Discuss limitations at study and outcome level (e.g., risk of bias), and at review-level (e.g., incomplete retrieval of identified research, reporting bias).                                            | 9                  |
| Conclusions                   | 26 | Provide a general interpretation of the results in the context of other evidence, and implications for future research.                                                                                  | 9-10               |
| <b>FUNDING</b>                |    |                                                                                                                                                                                                          |                    |
| Funding                       | 27 | Describe sources of funding for the systematic review and other support (e.g., supply of data); role of funders for the systematic review.                                                               | 10                 |

From: Moher D, Liberati A, Tetzlaff J, Altman DG, The PRISMA Group (2009). Preferred Reporting Items for Systematic Reviews and Meta-Analyses: The PRISMA Statement. PLoS Med 6(7): e1000097. doi:10.1371/journal.pmed1000097

For more information, visit: [www.prisma-statement.org](http://www.prisma-statement.org).

Page 2 of 2

For peer review only - <http://bmjopen.bmj.com/site/about/guidelines.xhtml>

# BMJ Open

## Vortioxetine Treatment for Generalized Anxiety Disorder: A Meta-Analysis of Anxiety, Quality of Life, and Safety Outcomes

|                                 |                                                                                                                                                                                                                                                                                                                                                                                                                                                                                                                                                                                                                                                                                                                                                                                                                                |
|---------------------------------|--------------------------------------------------------------------------------------------------------------------------------------------------------------------------------------------------------------------------------------------------------------------------------------------------------------------------------------------------------------------------------------------------------------------------------------------------------------------------------------------------------------------------------------------------------------------------------------------------------------------------------------------------------------------------------------------------------------------------------------------------------------------------------------------------------------------------------|
| Journal:                        | <i>BMJ Open</i>                                                                                                                                                                                                                                                                                                                                                                                                                                                                                                                                                                                                                                                                                                                                                                                                                |
| Manuscript ID                   | bmjopen-2019-033161.R1                                                                                                                                                                                                                                                                                                                                                                                                                                                                                                                                                                                                                                                                                                                                                                                                         |
| Article Type:                   | Original research                                                                                                                                                                                                                                                                                                                                                                                                                                                                                                                                                                                                                                                                                                                                                                                                              |
| Date Submitted by the Author:   | 04-Oct-2019                                                                                                                                                                                                                                                                                                                                                                                                                                                                                                                                                                                                                                                                                                                                                                                                                    |
| Complete List of Authors:       | Bin, Qin; Affiliated Liuzhou General Hospital of Guangxi University of Science and Technology<br>Huang, Guangsu; Affiliated Liuzhou General Hospital of Guangxi University of Science and Technology, Department of Neurology<br>Yang, Qian; Affiliated Liuzhou General Hospital of Guangxi University of Science and Technology, Department of Neurology<br>Zhao, Mingjun; The Second Affiliated Hospital of Xinxiang Medical University<br>Chen, Hong; Affiliated Liuzhou General Hospital of Guangxi University of Science and Technology, Department of Neurology<br>Gao, Wen; Affiliated Liuzhou General Hospital of Guangxi University of Science and Technology, Department of Neurology<br>Yang, Mingxiu; Affiliated Liuzhou General Hospital of Guangxi University of Science and Technology, Department of Neurology |
| <b>Primary Subject Heading</b>: | Mental health                                                                                                                                                                                                                                                                                                                                                                                                                                                                                                                                                                                                                                                                                                                                                                                                                  |
| Secondary Subject Heading:      | Pharmacology and therapeutics, Mental health                                                                                                                                                                                                                                                                                                                                                                                                                                                                                                                                                                                                                                                                                                                                                                                   |
| Keywords:                       | Multimodal therapy, Generalized anxiety disorder, Vortioxetine, Meta-analysis                                                                                                                                                                                                                                                                                                                                                                                                                                                                                                                                                                                                                                                                                                                                                  |
|                                 |                                                                                                                                                                                                                                                                                                                                                                                                                                                                                                                                                                                                                                                                                                                                                                                                                                |

SCHOLARONE™  
Manuscripts

1  
2  
3  
4  
5  
6  
7  
8  
9  
10  
11  
12  
13  
14  
15  
16  
17  
18  
19  
20  
21  
22  
23  
24  
25  
26  
27  
28  
29  
30  
31  
32  
33  
34  
35  
36  
37  
38  
39  
40  
41  
42  
43  
44  
45  
46  
47  
48  
49  
50  
51  
52  
53  
54  
55  
56  
57  
58  
59  
60

1 **Vortioxetine Treatment for Generalized Anxiety Disorder: A Meta-Analysis of**  
2 **Anxiety, Quality of Life, and Safety Outcomes**

3

4

5 Bin Qin,<sup>1</sup> Guangsu Huang,<sup>1</sup> Qian Yang,<sup>1</sup> Mingjun Zhao,<sup>2</sup> Hong Chen,<sup>1</sup> Wen Gao,<sup>1</sup> Mingxiu Yang<sup>1</sup>

6

7

8 **Author affiliations**

9 <sup>1</sup>Department of Neurology, Affiliated Liuzhou General Hospital of Guangxi University of Science and  
10 Technology (Liuzhou General Hospital), Liuzhou 545006, Guangxi, China,

11 <sup>2</sup>Department of Pharmacy, The Second Affiliated Hospital of Xinxiang Medical University (Henan Mental  
12 Hospital), Xinxiang 453000, China.

13

14 Correspondence to Professor Mingxiu Yang; lzrmyyymx@126.com.

15

16

17 Bin Qin, Guangsu Huang and Qian Yang contributed equally to this study

18

19

20

**Abstract:**

**Objectives** The aim of this study was to investigate the efficacy, tolerability, safety, and impact on quality of life (QoL) and functional status of vortioxetine treatment for patients with generalized anxiety disorder (GAD) by performing a meta-analysis of randomized controlled trials.

**Design** Systematic review and meta-analysis.

**Data sources** Data mining was conducted in January 2019 across PubMed, EMBASE, PsycINFO, Cochrane Central Register of Controlled Trials Cochrane Library, Web of science, and ClinicalTrials.gov.

**Eligibility criteria for selecting studies** All published Randomized controlled trials (RCTs) which assessed the effect of vortioxetine treatment for patients with GAD when compared with a placebo group were included.

**Data extraction and synthesis** Relevant data was extracted and synthesized narratively. Results were expressed as standardized mean differences (SMDs) or odds ratios (ORs) with 95% confidence intervals (CIs).

**Results** Our meta-analysis showed that multiple doses (2.5, 5, and 10 mg/day) of vortioxetine did not significantly improve the response rates, compared to placebo (OR = 1.16, 95% CI=0.84–1.60, P=0.38; OR = 1.41, 95% CI=0.82–2.41, P=0.21; and OR = 1.05, 95% CI=0.76–1.46, P=0.75). Moreover, there was no statistically significant difference regarding the remission rates, discontinuation for any reason rates, discontinuation due to adverse events rates, Short Form 36 Health Survey scores, or Sheehan Disability Scale scores between administration of multiple doses (2.5, 5, and 10 mg/day) of vortioxetine and placebo.

**Conclusions** Although our results suggest that vortioxetine did not improve the generalized anxiety disorder symptoms and QoL and functional status impairment of patients with GAD, it was safe and well tolerated. Clinicians should interpret and translate our data with caution, as the meta-analysis was based on a limited number of randomized controlled trials.

**Keywords:** Multimodal therapy; Generalized anxiety disorder; Vortioxetine; Meta-analysis

**Word count:** 3548.

**Strengths and limitations of this study**

- ▶ This systematic review and meta-analysis provides evidence for the efficacy, tolerability, and safety of vortioxetine in patients with generalized anxiety disorder
- ▶ Improvement of quality of life and functional status impairment were also evaluated to judge the patients' well-being of vortioxetine.
- ▶ Strong and reliable methodological and statistical procedures were applied.
- ▶ Due to the short-term follow-up in the evaluated studies, the long-term effect was not studied.

## 1 Introduction

2 Generalized anxiety disorder (GAD) is a common, chronic, costly, and disabling mental disorder that is  
3 marked by persistent anxiety and worry, and multiple psychological and physical symptoms.<sup>1,2</sup> It is also  
4 characterized by various psychological and somatic complaints, such as autonomic arousal, restlessness,  
5 fatigue, problems with concentration, irritability, and sleeplessness.<sup>1</sup> The estimated 1-year prevalence rate  
6 of GAD is between 1.2% and 1.9%, and the lifetime prevalence is between 4.3% and 5.9%.<sup>2,3</sup> Since most  
7 patients are still affected for 6 to 12 years after diagnosis, GAD is usually considered a chronic disorder and  
8 a major burden on the individual, their family, and health care services.<sup>2,4</sup> Anxiety is a common  
9 comorbidity of chronic medical diseases including atopic dermatitis, asthma, rheumatoid arthritis, lupus  
10 and stroke. Anxiety has a negative impact on the quality of life of patients suffer from chronic diseases.<sup>5,6</sup>

11 Vortioxetine is a multimodal antidepressant that was approved for the treatment of major depressive  
12 disorder (MDD), by the US Food and Drug Administration (FDA) in September 2013. Vortioxetine's  
13 mechanism of action is related to its multimodal activity, which combines two pharmacological properties:  
14 direct modulation of receptor activity and inhibition of the 5-HT transporter, and thereby with potential  
15 benefits in the treatment of major depressive episode and, probably, GAD and anxiety disorders.<sup>7</sup> In  
16 addition, vortioxetine cause significant increase in the hippocampal Brain Derived Neurotrophic Factors  
17 levels as compared with selective serotonin reuptake inhibitors.<sup>8</sup> Several meta-analyses have proved the  
18 efficacy of vortioxetine for the treatment of MDD.<sup>9-11</sup> A recent scientometric analysis reported the  
19 popularity of vortioxetine is on the rising trend.<sup>12</sup> Clinical trials evaluating its efficacy for the treatment of  
20 GAD, with doses up to 10 mg/day, have also yielded some interesting findings.<sup>13-16</sup> Moreover, as  
21 vortioxetine has been proven to be efficient in the treatment of MDD comorbid with GAD, it is possible  
22 that it constitutes an effective treatment for GAD alone, as well.<sup>17</sup>

23 Interestingly, the efficacy of vortioxetine therapy in reducing anxiety symptom severity in GAD is  
24 summarized in two previous meta-analyses.<sup>18,19</sup> Both reviews analyzed its efficacy only in terms of  
25 symptom severity on the underlying continuous rating scales, and did not assess dichotomous response and  
26 remission outcomes. However, a recent meta-analysis examined the efficacy of multiple doses of  
27 vortioxetine in terms of dichotomous response outcomes, and the results showed no significant  
28 improvement in the outcomes of treating GAD with vortioxetine compared to treating GAD with placebo.<sup>20</sup>  
29 The efficacy was only assessed using continuous rating scales or dichotomous response; thus, the authors  
30 of these meta-analyses and of a relevant narrative review noted that a comprehensive summary of efficacy  
31 data is missing. Further, both these reviews only provided an assessment of efficacy and safety outcomes,  
32 and did not include outcomes of importance and patient-focused assessments, such as assessment of  
33 functional impairment and quality of life (QoL). Currently there is growing interest in assessing the QoL  
34 and functional status impairment in patients with psychological disorders.<sup>21,22</sup> In addition, the importance of  
35 including such assessments in evaluations of the influence of psychological disorders and their treatment, is  
36 widely recognized.<sup>23-26</sup> Our previous network meta-analysis concluded that risperidone and aripiprazole  
37 improved the QoL of patients with treatment-resistant depression.<sup>27</sup> Despite the growing interest in the

1 field, studies addressing the impairment of QoL and functional status caused by anxiety disorders have  
2 progressed slowly.<sup>28</sup> Moreover, GAD is an important public mental health problem that causes poor QoL  
3 and functional status impairment,<sup>23</sup> with substantial impact on work and social roles.<sup>29</sup> Thus, the outcome  
4 of post-treatment QoL assessments is recognized as an important measure of treatment efficacy for patients  
5 with GAD.<sup>30</sup>

6 The assessment of antianxiety therapy benefits on QoL and functional status impairment in patients  
7 with GAD is becoming increasingly common in clinical studies, mainly because, both aspects are important  
8 for the patients' overall well-being and recovery. Currently, the direct effect of vortioxetine treatment on  
9 QoL and functional status impairment in patients with GAD is unclear. Therefore, this meta-analysis was  
10 conducted to provide a comprehensive estimate of the efficacy, safety, and improving QoL and functional  
11 status impairment profiles of vortioxetine treatment of GAD.

## 12 13 **Methods**

14 All steps of this review were performed in strict accordance with the Cochrane Handbook for Systematic  
15 Reviews of Interventions.<sup>31</sup> The PRISMA statement guidelines were followed during the meta-analysis and  
16 preparation of this review.<sup>32</sup>

### 17 18 **Search strategy**

19 As of January 2019, we searched PubMed, EMBASE, PsycINFO, Cochrane Central Register of Controlled  
20 Trials (Cochrane Library), Web of science, and ClinicalTrials.gov (www.clinicaltrials.gov). Search terms  
21 included “vortioxetine OR Lu AA21004” OR Brintellix” AND “anxiety OR anxiety disorder OR anxiety  
22 disorders OR mood disorder OR mood disorders.” No language or time restrictions were applied. Titles and  
23 abstracts were screened by two independent reviewers, before full texts of potentially relevant articles were  
24 retrieved for further evaluation. The decision to include a study was then made by two independent  
25 reviewers (BQ and WG), after full-text review. The reference lists of included articles were further hand-  
26 searched to identify additional relevant articles.

### 27 28 **Eligibility Criteria and Study Selection**

29 We included all clinical trials meeting the following criteria: (a) randomized controlled trials  
30 (RCTs) involving patients ( $\geq 18$  years old) primarily diagnosed with GAD, according to the criteria of the  
31 Diagnostic and Statistical Manual of Mental Disorders, fourth edition, text revision (DSM-IV-TR), and (b)  
32 RCTs comparing outcomes in efficacy, QoL, and functional impairment between vortioxetine and placebo.  
33 We excluded (a) retrospective and observational studies; (b) non-human studies; (c) theses and conference  
34 abstracts; and (d) studies including patients that had any concurrent psychiatric disorders with GAD or any  
35 prior history of psychiatric disorders, such as manic or hypomanic episodes, schizophrenia, or substance  
36 use disorders. Eligibility screening was performed in two steps, each by two independent reviewers (BQ  
37 and WG): (a) title and abstract screening for relevance to the study objective, and (b) full text screening for



1 eligibility for a meta-analysis. Conflicts were resolved by the opinion of a third reviewer (MY).

### 3 **Outcomes**

#### 4 Efficacy measures

5 Response was defined across studies as a 50% improvement of the Hamilton Anxiety Rating Scale (HAM-  
6 A) total score from baseline to end point. Remission was defined as a HAM-A total score of  $\leq 7$  at the  
7 study end point. The continuous measure of efficacy was the mean change from baseline in total scores on  
8 the HAM-A, as defined by the individual study.

#### 10 Safety and tolerability measures

11 Data on the discontinuation for any reason (tolerability) and the numbers of discontinuation due to adverse  
12 events (AEs) (safety) were included in the analysis.

#### 14 QoL and functioning measures

15 QoL can be assessed by study-designed questionnaires and disease-specific or generic instruments. These  
16 instruments assess an individual's physical, emotional, psychological, and social health.<sup>33,34</sup> We selected  
17 the Short Form 36 Health Survey (SF-36)<sup>35</sup> scores as the outcome indicator for QoL to preserve sufficient  
18 homogeneity for meta-analysis, because this instrument is used to measure QoL for the GAD population in  
19 many studies. And, studies were excluded if the QoL outcome was reported by the other rating scales. The  
20 Sheehan Disability Scale (SDS),<sup>36</sup> a reliable, valid, brief, self-report scale that assesses disability in work,  
21 social, and family life, is the only measure of functional impairment employed by the trials included in this  
22 meta-analysis.

### 24 **Data Extraction**

25 Two independent reviewers (BQ and WG) extracted the following data from the included studies: (a)  
26 baseline characteristics of enrolled patients, (b) general characteristics of the study design, (c) information  
27 on efficacy, safety, tolerability, QoL, and functioning outcome. Data were summarized by one investigator  
28 and checked by a second reviewer. Any discrepant data were, again, examined by a third reviewer (MY), to  
29 ensure accurate data were obtained.

### 31 **Risk of Bias Assessment**

32 The risk of bias within each study was assessed by two independent reviewers (BQ and WG) using the  
33 Cochrane Risk of Bias assessment tool, as described in the Cochrane Handbook for Systematic Reviews of  
34 Interventions 5.1.0.<sup>31</sup> This tool classifies the studies as having low, unclear, or high risk of bias across six  
35 domains: sequence generation, allocation concealment, blinding, missing data, selective reporting, and  
36 other biases.

## **Data Analysis**

The meta-analysis was conducted using RevMan 5.3 software (Cochrane Collaboration, London, UK) and Stata 13.0 software (StataCorp LP, College Station, TX, USA). Odds ratios (ORs) and 95% CIs were used to assess binary outcomes, such as response and remission rates, as well as discontinuation for any reason rates. In addition, we converted continuous data to standardized mean differences (SMDs) and 95% CIs. The statistical heterogeneity among trials was measured by Q statistics and the  $I^2$  test. Higher  $I^2$  values indicate greater heterogeneity, with  $I^2$  values of 25, 50, and 75% signifying mild, moderate, and high heterogeneity, respectively.<sup>37,38</sup> Based on heterogeneity, data were pooled to estimate the overall effect of all the interventions by random-effect or fixed-effect modelling. Fixed-effect models assume that the population effect sizes are the same for all studies. In contrast, random-effects model attempted to generalize findings beyond the included studies by assuming that the selected studies are random samples from a larger population.<sup>39</sup> Sensitivity analyses were performed to test the impact robustness of every single study on the overall results. Publication bias could be assessed by visual inspection of a funnel plot, and the Egger test was used to evaluate publication biases. However, according to Egger and colleagues, assessing publication bias using the funnel plot-based methods is not reliable when fewer than 10 pooled studies are used in the direct comparison.<sup>40</sup>

## **Patient and public involvement**

Patients or the public were not involved in the conceptualisation or carrying out of this research.

## **Results**

### **Search results**

We identified 94 references from the electronic literature search. After screening the titles and abstracts, 85 were excluded because they failed to meet the inclusion criteria. By reading the full text of the remaining nine articles, five more were excluded: one study included patients with depression, one study focused on vortioxetine in the prevention of relapse of GAD, another one constituted a conference abstract and did not provide treatment outcomes, and two studies were eliminated because they were review articles. Ultimately, only four studies that fully satisfied the pre-established inclusion criteria of this meta-analysis were included (see e-Figure 1).<sup>13-16</sup>

### **Study Characteristics**

Four included studies were published between 2012 and 2014 (Table 1).<sup>13-16</sup> The collective patient population comprised 1074 individuals in the vortioxetine group and 613 individuals in the placebo group. The administered doses of vortioxetine were 2.5, 5, and 10 mg/day. The mean age of participants ranged from 36.8 to 45.3 years. All studies were characterized by a preponderance of female subjects, with proportions ranging from 60 to 70%. The main characteristics of these studies are presented in Table 1.

## Study Quality

The risks of bias in each study is summarized in e-Figure 2. All studies claimed randomization and three articles described the method of random sequence generation (random number table, computer generated). Three trials provided information that allowed us to assess whether an adequate concealment of the allocation procedure was used. All studies reported the blinding of participants. Therefore, all trials were deemed to have a mild-to-moderate risk of bias.

## Efficacy

In terms of response, a total of four studies were included in the analysis; the overall ORs observed for groups treated with multiple doses (2.5, 5, and 10 mg/day) of vortioxetine compared to placebo were 1.16 (95% CI=0.84–1.60, Z=0.89, P=0.38), 1.41 (95% CI=0.82–2.41, Z=1.25, P=0.21), and 1.05 (95% CI=0.76–1.46, Z=0.32, P=0.75), respectively (Figure 1). The results showed that there was no statistically significant difference in the response rates among the vortioxetine- and placebo groups. In addition, there was no statistically significant difference for the remission rates in multiple doses (2.5, 5, and 10 mg/d) of vortioxetine compared to placebo (Figure 2).

Pooled effect sizes for the mean change from baseline in total scores on the HAM-A are provided in Figure 3. The overall SMDs observed for the groups treated with multiple doses (2.5, 5, and 10 mg/d) of vortioxetine compared to the placebo were -0.13 (95% CI=-0.29–0.03, Z=1.56, P=0.12), -0.15 (95% CI=-0.48–0.18, Z=0.87, P=0.38), and -0.08 (95% CI=-0.24–0.08, Z=1.01, P=0.31), respectively. The results also showed that there was no statistically significant difference in the mean change from baseline in total scores on the HAM-A among the vortioxetine and placebo groups.

## Tolerability and safety

No significant difference was observed between the vortioxetine and placebo groups in terms of the likelihood of discontinuation for any reason (tolerability). The overall ORs observed for the groups treated with multiple doses (2.5, 5, and 10 mg/day) of vortioxetine compared to the placebo-treated group were 1.03 (95% CI=0.71–1.47, Z=0.14, P=0.89), 0.87 (95% CI=0.63–1.20, Z=0.87, P=0.38), and 1.06 (95% CI=0.74–1.52, Z=0.32, P=0.75), respectively (e-Figure 3). Additionally, there was no statistically significant difference in the discontinuation due to AEs (safety) between the groups treated with multiple doses (2.5, 5, and 10 mg/day) of vortioxetine and the group treated with placebo (e-Figure 4).

## Quality of life and functional status results

Three studies in this analysis reported SF-36 scores as the outcome measure of QoL. The overall SMDs of groups treated with multiple doses (2.5, 5, and 10 mg/d) of vortioxetine compared to placebo were 0.12 (95% CI=-0.11-0.35, Z=1.04, P=0.30), 0.22 (95% CI=-0.12-0.56, Z=1.26, P=0.21), and 0.09 (95% CI=-

0.14-0.32,  $Z=0.75$ ,  $P=0.45$ ), respectively (Figure 4). The results showed that there was no statistically significant difference in SF-36 scores among the different groups. SDS scores were available for all four studies included in this analysis. The overall SMDs for the groups treated with multiple doses (2.5, 5, and 10 mg/d) of vortioxetine compared to placebo were -0.11 (95% CI=-0.30-0.08,  $Z=1.09$ ,  $P=0.28$ ), -0.10 (95% CI=-0.27-0.06,  $Z=1.27$ ,  $P=0.21$ ), and -0.20 (95% CI=-0.39-0.00,  $Z=2.00$ ,  $P=0.05$ ), respectively (Figure 5). The results showed that there was no statistically significant difference in SDS among the different groups.

### Publication bias

The Egger test showed no significant difference main outcomes, indicating no publication bias.

### Discussion

In this meta-analysis of 4 randomized trials studying vortioxetine as a treatment for GAD, we found that vortioxetine (2.5-, 5- and 10-mg once-daily doses) did not significantly improve GAD symptoms and quality of life/ functional status compared to a placebo treatment. However, vortioxetine might be safe and well tolerated in this patient population. Our findings have some clinical implications for comprehensively understanding the risk–benefit profiles of vortioxetine treatment for GAD.

Our results are not consistent with those of the previous meta-analysis conducted by Pae et al, as that study found that vortioxetine was significantly more effective than the placebo.<sup>18</sup> In their study, they only performed the analysis of mean change from baseline in total scores on the HAM-A, and included all randomized subjects. However, our meta-analysis was separately conducted according to the doses of vortioxetine, and we assessed the efficacy in terms of mean change from baseline in total scores on the HAM-A, response rates, and remission rates. Doses of vortioxetine may be clinically important factors for its efficacy in GAD patients. Thus, the results of our meta-analysis were more reliable and stable. Moreover, a recent meta-analysis showed that there was no statistically significant difference regarding the response rates among groups treated with either multiple doses (2.5, 5, and 10 mg/day) of vortioxetine or a placebo.<sup>41</sup> Furthermore, the results of our meta-analysis demonstrated no statistically significant difference in the mean change from baseline in total scores on the HAM-A, remission rates, quality of life, and functional status among the groups. Thus, the results of our meta-analysis were more comprehensive.

Several reasons for these outcomes may have contributed to the negative results. A previous analysis of the Food and Drug Administration database concluded that negative results are commonly seen in anxiolytic agents administered for the treatment of anxiety disorders, including GAD, where less than one-half (48%) of the treatment arms were statistically superior to the placebo.<sup>42</sup> In this case, all anxiolytic agents included in the study are approved for GAD treatment in the United States, but only three out of seven treatment arms were separated from the placebo. Moreover, the results some studies have found that negative results<sup>14-16</sup> had a higher placebo response rate than those with positive results.<sup>13,43</sup> Although this correlation has not been established in GAD, it is reasonable to speculate that an elevated placebo response

1 could reduce the treatment effect. Unfortunately, because no positive control was included in our meta-  
2 analysis, it is impossible to determine the lack-of-treatment effect. In addition, the racial diversity may have  
3 introduced differences in response and remission rates; for example, the studied population of the trial that  
4 showed negative results was racially diverse, whereas the population of the trial that showed positive  
5 results was almost entirely Caucasian. Hence, the results of the STAR\*D study demonstrate that non-  
6 Caucasians were significantly less likely to achieve remission.<sup>44</sup> Furthermore, the mean baseline HAM-A  
7 total scores in most of the included studies were relatively high (ranging from 24.5 to 27); inflated baseline  
8 HAM-A total scores are a possible consequence of less stringent screening practices. Relative to placebo,  
9 vortioxetine treatment, in doses of 10 and 20 mg, demonstrated significant improvement in depressive  
10 symptoms, however, the RCTs that were studied, in accordance with those included in our meta-analysis,  
11 used the optimal doses of 2.5-10 mg. Higher dosages, such as 20 mg or even more, would be more  
12 beneficial in anxiety disorders, whereas lower dosages may unaffected anxiety symptoms. However, it is  
13 unlikely that any single reason can explain the inconsistent results observed in the vortioxetine for GAD.

14 Although our meta-analysis did not demonstrate a statistically significant anxiolytic effect of  
15 vortioxetine, it did provide information regarding drug tolerability. Our study found that there was no  
16 statistically significant difference for the discontinuation for any reason rates and discontinuation due to  
17 AEs rates among groups receiving either multiple doses (2.5, 5, and 10 mg/day) of vortioxetine compared  
18 to placebo, which is similar to the findings of a previous meta-analysis.<sup>9,18</sup> Thus, the vortioxetine doses  
19 were well tolerated, and were associated with similar discontinuation for any reason rates and  
20 discontinuation due to AEs rates when compared to the placebo.

21 GAD is associated with significant functional impairment in many areas, including social, occupational,  
22 and mental consequences; and when combined with physical impairment, together they influence QoL. The  
23 effectiveness of GAD treatment for improving QoL and functional outcomes is potentially confounded by  
24 the bidirectional relationship of anxiety symptoms and QoL/functional impairment. This is the first meta-  
25 analysis to report prospective assessment of QoL/functional status impairment in patients with GAD.  
26 Unfortunately, our meta-analysis of randomized controlled trials with GAD patients showed no significant  
27 improvement in the aforementioned aspects after vortioxetine treatment compared to after treatment with  
28 the placebo. Our results are not consistent with those of a previous meta-analysis of the effect of  
29 vortioxetine treatment on overall functioning in patients with MDD.<sup>45</sup> The meta-analysis, conducted by  
30 Florea et al, demonstrated that vortioxetine, in doses of 5-20 mg for 6/8 weeks, improved overall  
31 functioning in patients with MDD. Relative to placebo, vortioxetine treatment, in doses of 10 and 20 mg,  
32 demonstrated significant improvement in SDS total score and functional remission. However, the RCTs  
33 that were studied, in accordance with those included in our meta-analysis, used the optimal doses of 2.5-10  
34 mg. Thus, the reason for the lack of congruence between these two meta-analyses may be the difference in  
35 the optimal doses. Meanwhile, a recent meta-analysis of vortioxetine in working patients with GAD,<sup>46</sup>  
36 showed that vortioxetine benefits adult patients who are working and/or pursuing an education. Thus,  
37 future research should be directed to provide more RCTs, specifically targeted to individuals with GAD, in

1 order to assess the efficacy of vortioxetine in a larger sample, as well as to define the best therapeutic  
2 dosage.

3 The results of our meta-analysis should be interpreted in light of the following potential limitations.  
4 First, we included only four RCTs, which may have influenced the reliability of the results. Second, the  
5 duration of each trial included in our meta-analysis was 8 weeks; this is an important issue because GAD  
6 patients typically require long-term pharmacological treatment. We found only one study focusing on long-  
7 term relapse prevention, which showed no significant improvement of relapse prevention effect after long-  
8 term (maintenance) vortioxetine treatment for GAD compared to placebo.<sup>47</sup> Furthermore, the systematic  
9 review, conducted by Perna et al, indicated that although some recent data support the long-term efficacy of  
10 vortioxetine for GAD and showed a favorable tolerability profile, the conflicting short-term studies and  
11 limited clinical experience recommend its use only as second-line therapy.<sup>48</sup> In addition, owing to a limited  
12 number of studies included in our meta-analysis, we did not compare the onset time between the groups  
13 treated with multiple doses of vortioxetine and placebo. Finally, all the included trials were supported by  
14 the Takeda Pharmaceutical Company Ltd. as part of a joint clinical development program with H.  
15 Lundbeck A/S, which may have also influenced the results.

## 16 **Conclusions**

17 In summary, GAD is an illness that is characterized not only by severe anxiety symptoms, but also by  
18 diminished functioning and QoL. The challenge for interventions is not only to achieve improvement of  
19 symptoms, but also to enhance patients' functioning ability and QoL. Our comprehensive evaluation of  
20 efficacy, safety, and impact on QoL provides a critical insight that may be useful for clinicians attempting  
21 to thoroughly understand the risk–benefit profiles of vortioxetine treatment for GAD. Vortioxetine did not  
22 significantly improve GAD symptoms and QoL as compared to the placebo; nevertheless, it was safe and  
23 well tolerated in this patient population. However, our results should be interpreted and translated into  
24 clinical practice with caution, owing to the limited number of RCTs included in the present meta-analysis.

25  
26  
27 **Acknowledgments** We thank Editage (www.editage.cn) for editing the English text of a draft of this  
28 manuscript.

29  
30 **Contributors** BQ, GH, QY and MY were involved in conceptualisation and design of the study and critical  
31 review of the manuscript. BQ, GH and MY performed the data extraction. BQ, MZ, HC and WG conceived  
32 the study and reviewed the manuscript for important intellectual content. All authors approved the final  
33 manuscript as submitted.

34  
35 **Funding** The authors have not declared a specific grant for this research from any funding agency in the  
36 public, commercial or not-for-profit sectors.

37  
38 **Competing interests** None declared.

39  
40 **Patient consent for publication** Not required.

1  
2  
3  
4  
5  
6  
7  
8  
9  
10  
11  
12  
13  
14  
15  
16  
17  
18  
19  
20  
21  
22  
23  
24  
25  
26  
27  
28  
29  
30  
31  
32  
33  
34  
35  
36  
37  
38  
39  
40  
41  
42  
43  
44  
45  
46  
47  
48  
49  
50  
51  
52  
53  
54  
55  
56  
57  
58  
59  
60

1 **Data sharing statement** Additional data can be requested by emailing [lzrmyyymx@126.com](mailto:lzrmyyymx@126.com).  
2

For peer review only

## References

1. American Psychiatric Association. Diagnostic and Statistical Manual of Mental Disorders (DSM-5), Fifth Edition. Washington, DC: American Psychiatric Association; 2013.
2. Tyrer P, Baldwin D. Generalised anxiety disorder. *Lancet* 2006; 368: 2156-2166.
3. Cuijpers P, Sijbrandij M, Koole S, et al. Psychological treatment of generalized anxiety disorder: a meta-analysis. *Clin Psychol Rev* 2014; 34: 130-140.
4. Yonkers KA, Dyck IR, Warshaw M, et al. Factors predicting the course of generalised anxiety disorder. *Br J Psychiatry* 2000; 176: 544-549.
5. Ngo CQ, Phan PT, Vu GV, et al. Effects of Different Comorbidities on Health-Related Quality of Life among Respiratory Patients in Vietnam. *J Clin Med* 2019; 8. pii: E214.
6. Nguyen SH, Nguyen LH, Vu GT, et al. Health-Related Quality of Life Impairment among Patients with Different Skin Diseases in Vietnam: A Cross-Sectional Study. *Int J Environ Res Public Health* 2019; 16. pii: E305.
7. De Berardis D, Olivieri L, Nappi F, et al. Vortioxetine and Aripiprazole Combination in Treatment-Resistant Obsessive-Compulsive Disorder: A Case Report. *J Clin Psychopharmacol* 2017; 37: 732-734.
8. Lu Y, Ho CS, McIntyre RS, et al. Effects of vortioxetine and fluoxetine on the level of Brain Derived Neurotrophic Factors (BDNF) in the hippocampus of chronic unpredictable mild stress-induced depressive rats. *Brain Res Bull* 2018; 142: 1-7.
9. Pae CU, Wang SM, Han C, et al. Vortioxetine: a meta-analysis of 12 short-term, randomized, placebo-controlled clinical trials for the treatment of major depressive disorder. *J Psychiatry Neurosci* 2015; 40: 174-186.
10. Berhan A, Barker A. Vortioxetine in the treatment of adult patients with major depressive disorder: a meta-analysis of randomized double-blind controlled trials. *BMC Psychiatry* 2014; 14: 276.
11. Fu J, Chen Y. The efficacy and safety of 5 mg/d vortioxetine compared to placebo for major depressive disorder: a meta-analysis. *Psychopharmacology (Berl)* 2015; 232: 7-16.
12. Tran BX, Ha GH, Vu GT, et al. Indices of Change, Expectations, and Popularity of Biological



- 1  
2  
3 1 Treatments for Major Depressive Disorder between 1988 and 2017: A Scientometric Analysis. *Int J*  
4  
5 2 *Environ Res Public Health* 2019; 16. pii: E2255.  
6  
7 3 13. Bidzan L, Mahableshwarkar AR, Jacobsen P, et al. Vortioxetine (Lu AA21004) in generalized  
8  
9 4 anxiety disorder: results of an 8-week, multinational, randomized, double-blind, placebo-controlled  
10  
11 5 clinical trial. *Eur Neuropsychopharmacol* 2012; 22: 847-857.  
12  
13 6 14. Mahableshwarkar AR, Jacobsen PL, Serenko M, et al. A randomized, double-blind, fixed-dose study  
14  
15 7 comparing the efficacy and tolerability of vortioxetine 2.5 and 10mg in acute treatment of adults  
16  
17 8 with generalized anxiety disorder. *Hum Psychopharmacol* 2014; 29: 64-72.  
18  
19 9 15. Mahableshwarkar AR, Jacobsen PL, Chen Y, et al. A randomised, double-blind, placebo controlled,  
20  
21 10 duloxetine-referenced study of the efficacy and tolerability of vortioxetine in the acute treatment of  
22  
23 11 adults with generalised anxiety disorder. *Int J Clin Pract* 2014; 6: 49-59.  
24  
25 12 16. Rothschild AJ, Mahableshwarkar AR, Jacobsen P, et al. Vortioxetine (Lu AA21004) 5 mg in  
26  
27 13 generalized anxiety disorder: results of an 8-week randomized, double-blind, placebo-controlled  
28  
29 14 clinical trial in the United States. *Eur Neuropsychopharmacol* 2012; 22: 858-866.  
30  
31 15 17. Baldwin DS, Florea I, Jacobsen PL, et al. A meta-analysis of the efficacy of vortioxetine in patients  
32  
33 16 with major depressive disorder (MDD) and high levels of anxiety symptoms. *J Affect Disord* 2016;  
34  
35 17 206: 140-150.  
36  
37 18 18. Pae CU, Wang SM, Han C, et al. Vortioxetine, multimodal antidepressant for generalized anxiety  
38  
39 19 disorder: a systematic review and meta-analysis. *J Psychiatr Res* 2015; 64: 88-98.  
40  
41 20 19. Yee A, Ng CG, Seng LH. Vortioxetine Treatment for Anxiety Disorder: A Meta-Analysis Study.  
42  
43 21 *Curr Drug Targets* 2017; 19: 1412-1423.  
44  
45 22 20. Fu J, Peng L, Li X. The efficacy and safety of multiple doses of vortioxetine for generalized anxiety  
46  
47 23 disorder: a meta-analysis. *Neuropsychiatr Dis Treat* 2016; 12: 951-959.  
48  
49 24 21. Choo CC, Chew PKH, Ho CS, et al. Quality of Life in Patients With a Major Mental Disorder in  
50  
51 25 Singapore. *Front Psychiatry* 2019; 9: 727.  
52  
53 26 22. Lee Y, Rosenblat JD, Lee J, et al. Efficacy of antidepressants on measures of workplace functioning  
54  
55 27 in major depressive disorder: A systematic review. *J Affect Disord* 2018; 227: 406-415.  
56  
57 28 23. Bourland SL, Stanley MA, Synder AG, et al. Quality of life in older adults with generalized anxiety

- 1 disorder. *Aging. And Mental Health* 2000; 4: 315-323.
- 2
- 3 1
- 4
- 5 24. Frisch MB. *Manual and treatment guide for the Quality of Life Inventory*. Minneapolis: National
- 6
- 7 3
- 8 Computer Systems Inc; 1994.
- 9 4 25. Katschnig H. How useful is the concept of quality of life in psychiatry? In: Katschnig H, Freeman
- 10
- 11 5
- 12 H, Sartorius N. (Editors), *Quality of life in mental disorders*. Chichester: Wiley; 1997. p 3-16.
- 13 6 26. Steven EH. *Bridging science and service: A report by the National Advisory Mental Health*
- 14
- 15 7
- 16 Council's Clinical Treatment and Services Research Workgroup (NIH Publication No. 99-4353).
- 17 8
- 18 27. Zhou X, Keitner GI, Qin B, et al. Atypical Antipsychotic Augmentation for Treatment-Resistant
- 19
- 20 10
- 21 Depression: A Systematic Review and Network Meta-Analysis. *Int J Neuropsychopharmacol* 2015;
- 22 11
- 23 18: pyv060.
- 24 12 28. Mogotsi M, Kaminer D, Stein DJ. Quality of life in the anxiety disorders. *Harvard Rev Psychiat*
- 25
- 26 13
- 27 2000; 8: 273-282.
- 28 14 29. Henning ER, Turk CL, Mennin DS, et al. Impairment and quality of life in individuals with
- 29
- 30 15
- 31 generalized anxiety disorder. *Depress Anxiety* 2007; 24: 342-349.
- 32 16 30. Endicott J, Russell JM, Raskin J, et al. Duloxetine treatment for role functioning improvement in
- 33
- 34 17
- 35 generalized anxiety disorder: three independent studies. *J Clin Psychiatry* 2007; 68: 518-524.
- 36 18 31. Higgins JPT, Green S. *Cochrane Handbook for Systematic Reviews of Interventions Version 5.1.0*
- 37
- 38 19
- 39 updated March 2011. Available at: <http://www.cochrane-handbook.org>. Accessed November 13,
- 40 20
- 41 21 32. Moher D, Liberati A, Tetzlaff J, et al. Reprint--preferred reporting items for systematic reviews and
- 42
- 43 22
- 44 meta-analyses: the PRISMA statement. *Phys Ther* 2009; 89: 873-880.
- 45 23 33. Testa MA, Simonson DC. Assessment of quality-of-life outcomes. *N Engl J Med* 1996; 334: 835-
- 46
- 47 24
- 48 840.
- 49 25 34. Urbach DR. Measuring quality of life after surgery. *Surg Innov* 2005; 12: 161-165.
- 50
- 51 26 35. Ware JE Jr, Sherbourne CD. The MOS 36-item short-form health survey (SF-36). *Med Care* 1992;
- 52
- 53 27
- 54 30: 473-483.
- 55 28 36. Sheehan DV, Harnett-Sheehan K, Raj BA. The measurement of disability. *Int Clin*

- 1  
2  
3 1 Psychopharmacol 1996; 11: 89-95.  
4  
5 2 37. Higgins J, Thompson S, Deeks J, et al. Statistical heterogeneity in systematic reviews of clinical  
6  
7 3 trials: a critical appraisal of guideline and practice. *J Health Serv Res Policy* 2002; 7: 51-61.  
8  
9 4 38. Higgins JP, Thompson SG, Deeks JJ, et al. Measuring inconsistency in meta-analyses. *BMJ* 2003;  
10  
11 5 327: 557-660.  
12  
13 6 39. Ho RC, Ong HS, Kudva KG, et al. How to critically appraise and apply meta-analyses in clinical  
14  
15 7 practice. *Int J Rheum Dis* 2010; 13: 294-299.  
16  
17 8 40. Egger M, Davey Smith G, et al. Bias in meta-analysis detected by a simple, graphical test. *BMJ*  
18  
19 9 1997; 315: 629-634.  
20  
21 10 41. Fu J, Peng L, Li X. The efficacy and safety of multiple doses of vortioxetine for generalized anxiety  
22  
23 11 disorder: a meta-analysis. *Neuropsychiatr Dis Treat* 2016; 12: 951-959.  
24  
25 12 42. Khan A, Khan S, Brown WA. Are placebo controls necessary to test new antidepressants and  
26  
27 13 anxiolytics? *Int J Neuropsychopharmacol* 2002; 5: 193-197.  
28  
29 14 43. Liebowitz MR, Stein MB, Tancer M, et al. A randomized, double-blind, fixed-dose comparison of  
30  
31 15 paroxetine and placebo in the treatment of generalized social anxiety disorder. *J Clin Psychiatry*.  
32  
33 16 2002;63(1): 66-74.  
34  
35 17 44. Trivedi MH, Rush AJ, Wisniewski SR, et al. Evaluation of outcomes with citalopram for depression  
36  
37 18 using measurement-based care in STAR\*D: implications for clinical practice. *Am J Psychiatry*  
38  
39 19 2006; 163(1): 28-40.  
40  
41 20 45. Florea I, Loft H, Danchenko N, et al. The effect of vortioxetine on overall patient functioning in  
42  
43 21 patients with major depressive disorder. *Brain Behav* 2017; 7: e00622.  
44  
45 22 46. Christensen MC, Loft H, Florea I, et al. Efficacy of vortioxetine in working patients with  
46  
47 23 generalized anxiety disorder. *CNS Spectr* 2017. [https://doi: 10.1017/S1092852917000761](https://doi.org/10.1017/S1092852917000761).  
48  
49 24 47. Baldwin DS, Loft H, Florea I. Lu AA21004, a multimodal psychotropic agent, in the prevention of  
50  
51 25 relapse in adult patients with generalized anxiety disorder. *Int Clin Psychopharmacol* 2012; 27: 197-  
52  
53 26 207.2  
54  
55  
56  
57  
58  
59  
60

- 1  
2  
3  
4 1 48. Perna G, Alciati A, Riva A, et al. Long-Term Pharmacological Treatments of Anxiety Disorders: An  
5  
6 2 Updated Systematic Review. Curr Psychiatry Rep 2016; 18: 23.  
7  
8 3  
9  
10  
11  
12  
13  
14  
15  
16  
17  
18  
19  
20  
21  
22  
23  
24  
25  
26  
27  
28  
29  
30  
31  
32  
33  
34  
35  
36  
37  
38  
39  
40  
41  
42  
43  
44  
45  
46  
47  
48  
49  
50  
51  
52  
53  
54  
55  
56  
57  
58  
59  
60

For peer review only

1  
2  
3  
4  
5 **Table 1. Description of included studies.**

| 6 Study                                         | 7 Patients n                | 8 Age (mean, SD)                                                      | 9 Sex (Male, n, %)                                      | 10 Interventions                                              | 11 Duration (weeks) | 12 Key inclusion criteria for GAD |
|-------------------------------------------------|-----------------------------|-----------------------------------------------------------------------|---------------------------------------------------------|---------------------------------------------------------------|---------------------|-----------------------------------|
| 13 Bidzan et al. (2012) <sup>13</sup>           | T: 150;<br>C: 151           | T: 45.0 (14.1);<br>C: 45.3 (13.5)                                     | T: 47 (31.3);<br>C: 58 (38.4)                           | T: vtx (5 mg/d);<br>C: placebo                                | 8                   | DSM-IV-TR,<br>HAM-A $\geq$ 20     |
| 14 Mahableshwarkar et al. (2014a) <sup>14</sup> | T: 152, 152;<br>C: 153      | T: 40.8 (13.8);<br>43.3 (15.0);<br>C: 39.5 (13.5)                     | T: 49 (32.2),<br>56 (36.8);<br>C: 48 (31.4)             | T: vtx 2.5 mg/d,<br>vtx 10 mg/d;<br>C: placebo                | 8                   | DSM-IV-TR,<br>HAM-A $\geq$ 20     |
| 15 Mahableshwarkar et al. (2014b) <sup>15</sup> | T: 156, 156, 156;<br>C: 157 | T: 39.2 (11.90),<br>37.7 (11.96),<br>39.8 (12.33);<br>C: 36.8 (12.12) | T: 47 (30.1),<br>56 (35.9),<br>51 (32.7);<br>C: 55 (35) | T: vtx 2.5 mg/d,<br>vtx 5 mg/d,<br>vtx 10 mg/d;<br>C: placebo | 8                   | DSM-IV-TR,<br>HAM-A $\geq$ 20     |
| 16 Rothschild et al. (2012) <sup>16</sup>       | T: 152;<br>C: 152           | T: 41.0 (14.05);<br>C: 41.4 (12.81)                                   | T: 49 (32.2);<br>C: 55 (36.2)                           | T: vtx 5 mg/d;<br>C: placebo                                  | 8                   | DSM-IV-TR,<br>HAM-A $\geq$ 20     |

17 Note: T, Treatment group; C, Control group; mg/d, mg/day; GAD, Generalized anxiety disorder; DSM-IV-TR,  
18 Diagnostic and Statistical Manual of Mental Disorders, 4th edition Text Revision; HAM-A, Hamilton Anxiety  
19 Rating; vtx, Vortioxetine.  
20  
21  
22  
23  
24  
25  
26  
27  
28  
29  
30  
31  
32  
33  
34  
35  
36  
37  
38  
39  
40  
41  
42  
43  
44  
45  
46  
47  
48  
49  
50  
51  
52  
53  
54  
55  
56  
57  
58  
59  
60

## Figure legends

**Figure 1:** Odds ratios (ORs) and 95% confidence intervals (CIs) of the individual studies and the pooled data, comparing the response rates between the vortioxetine-treated and placebo groups.

Notes: (A) 2.5-mg/day vortioxetine versus placebo, (B) 5-mg/day vortioxetine versus placebo, and (C) 10-mg/day vortioxetine versus placebo.

**Figure 2:** Odds ratios (ORs) and 95% confidence intervals (CIs) of the individual studies and the pooled data, comparing the remission rates between the vortioxetine- and placebo groups.

Notes: (A) 2.5-mg/day vortioxetine versus placebo, (B) 5-mg/day vortioxetine versus placebo, and (C) 10-mg/day vortioxetine versus placebo.

**Figure 3:** Standardized mean differences (SMDs) and 95% confidence intervals (CIs) of the individual studies and the pooled data, comparing the mean change from baseline in total scores on the HAM-A, between the vortioxetine- and placebo groups.

Notes: (A) 2.5-mg/day vortioxetine versus placebo, (B) 5-mg/day vortioxetine versus placebo, and (C) 10-mg/day vortioxetine versus placebo.

**Figure 4:** Standardized mean differences (SMDs) and 95% confidence intervals (CIs) of the individual studies and the pooled data, comparing the Short Form 36 Health Survey (SF-36) scores between the vortioxetine- and placebo groups.

Notes: (A) 2.5-mg/day vortioxetine versus placebo, (B) 5-mg/day vortioxetine versus placebo, and (C) 10-mg/day vortioxetine versus placebo.

**Figure 5:** Standardized mean differences (SMDs) and 95% confidence intervals (CIs) of the individual studies and the pooled data, comparing the Sheehan Disability Scale (SDS) scores between the vortioxetine and placebo groups.

Notes: (A) 2.5-mg/day vortioxetine versus placebo, (B) 5-mg/day vortioxetine versus placebo, and (C) 10-mg/day vortioxetine versus placebo.

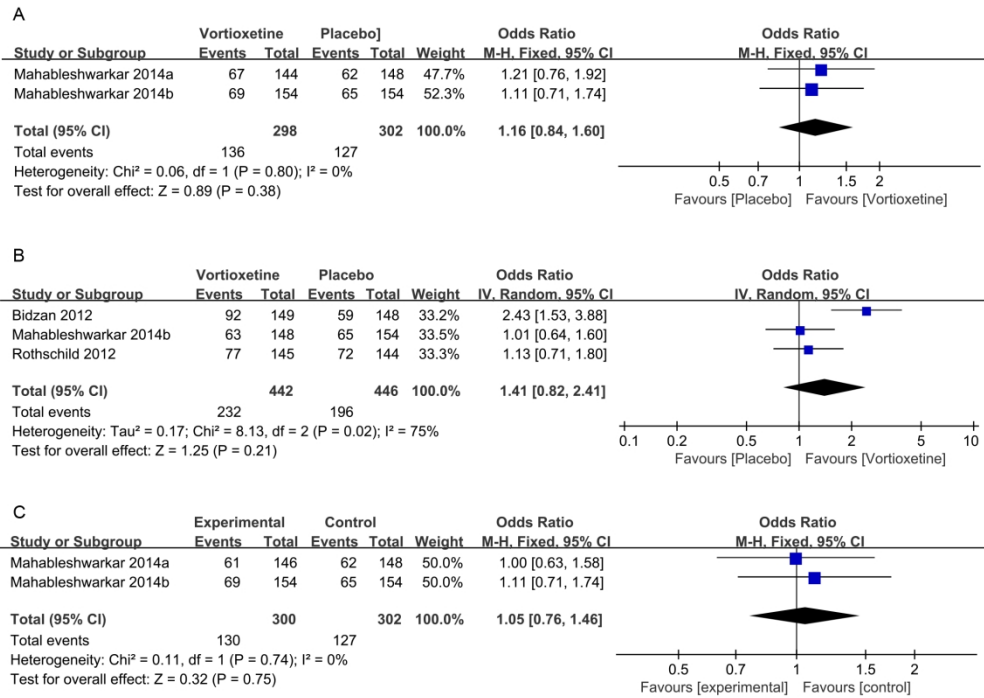

Figure 1

1  
2  
3  
4  
5  
6  
7  
8  
9  
10  
11  
12  
13  
14  
15  
16  
17  
18  
19  
20  
21  
22  
23  
24  
25  
26  
27  
28  
29  
30  
31  
32  
33  
34  
35  
36  
37  
38  
39  
40  
41  
42  
43  
44  
45  
46  
47  
48  
49  
50  
51  
52  
53  
54  
55  
56  
57  
58  
59  
60

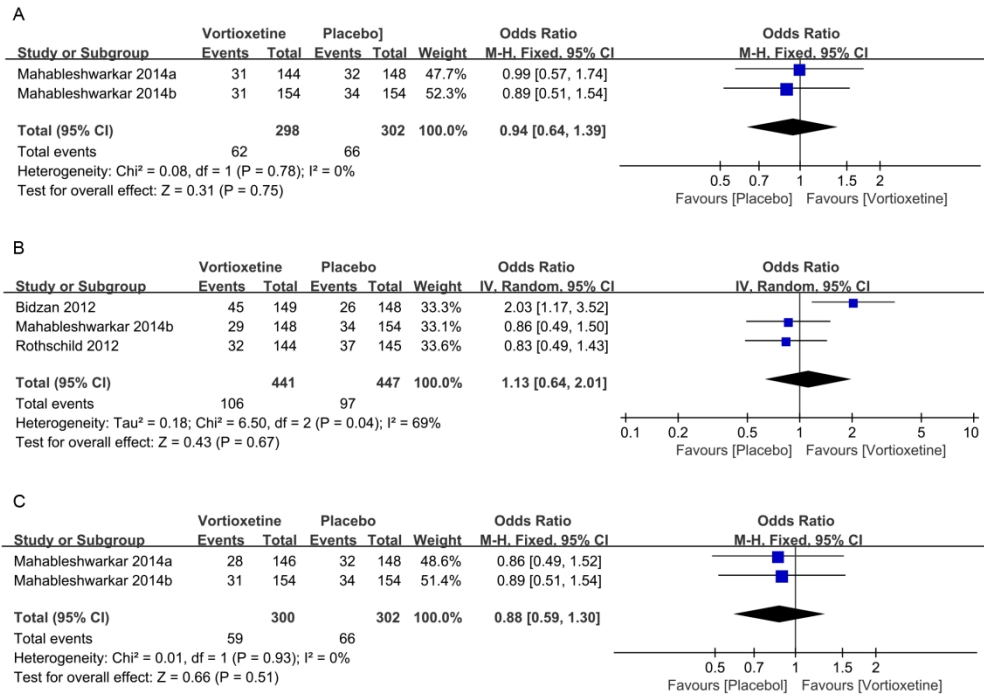

Figure 2



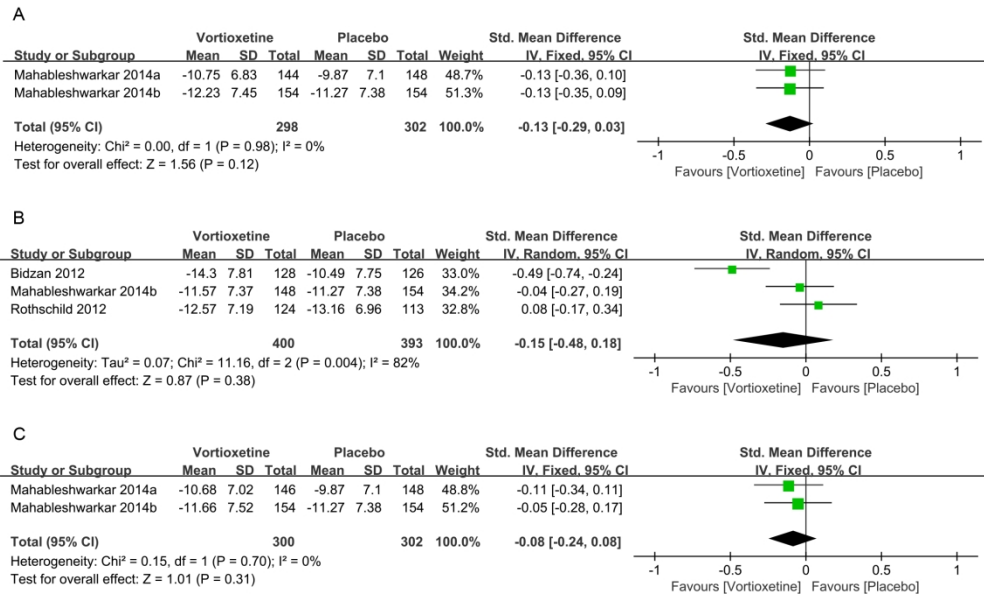

Figure 3

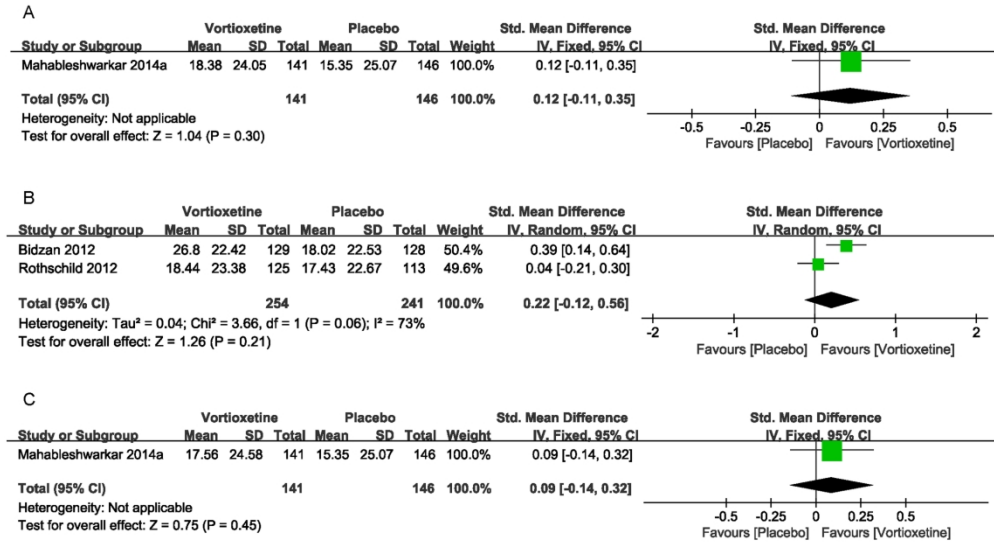

Figure 4

197x108mm (300 x 300 DPI)

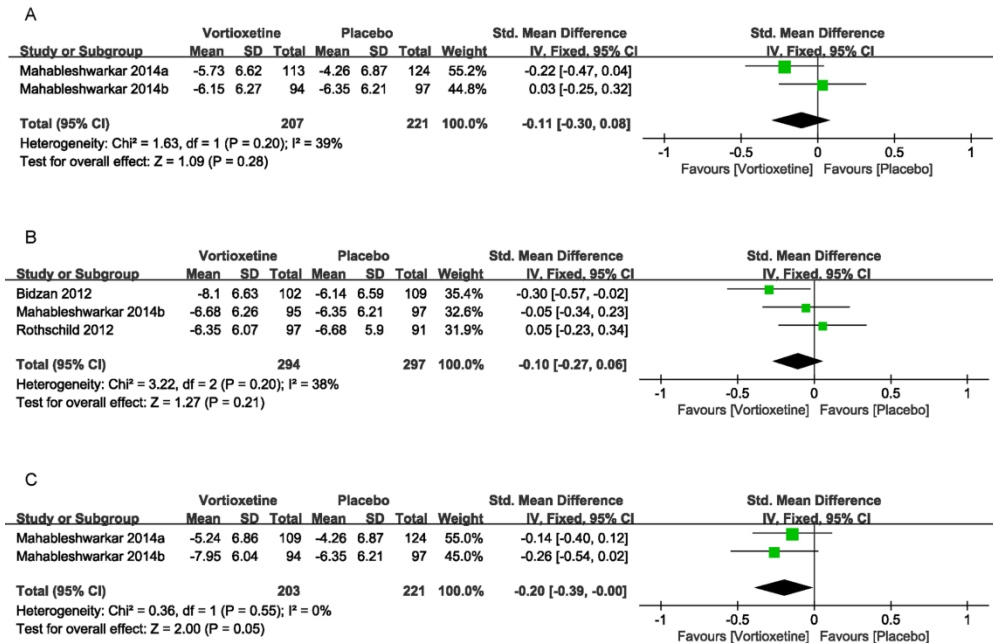

Figure 5

196x128mm (300 x 300 DPI)

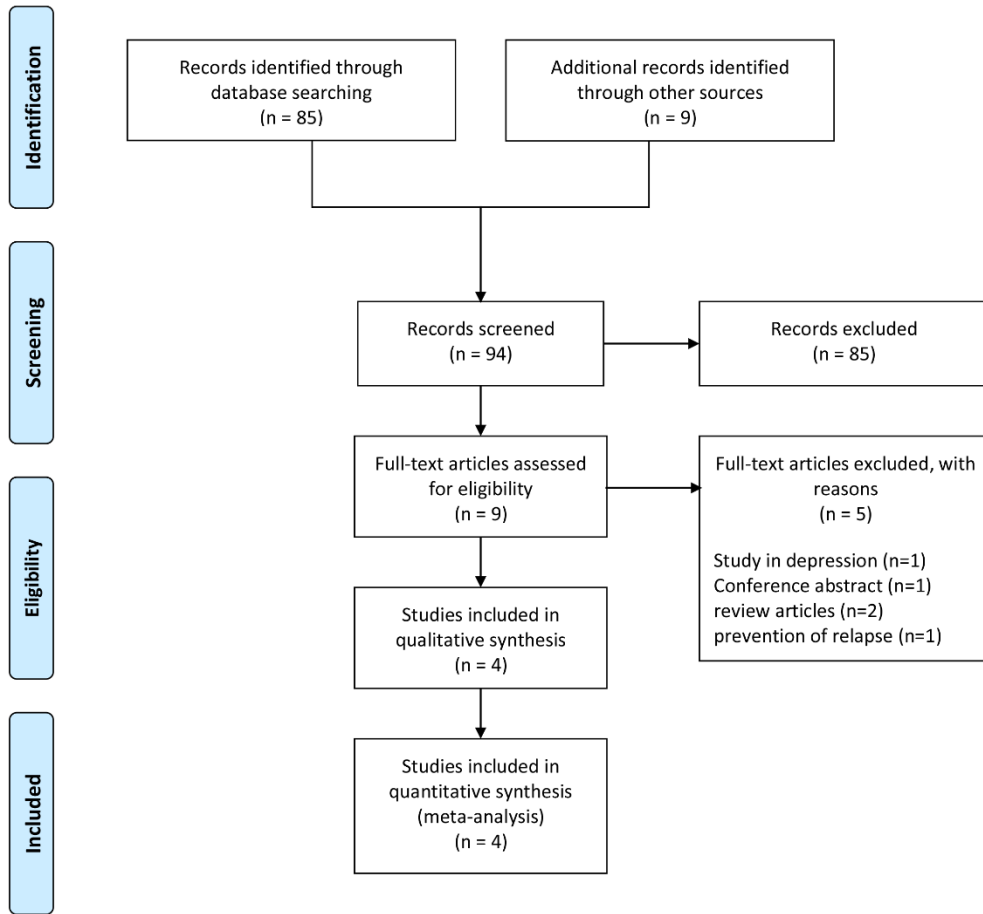

**e-Figure 1:** Search flow for the trial identification and selection process.

|                       | Random sequence generation (selection bias) | Allocation concealment (selection bias) | Blinding of participants and personnel (performance bias) | Incomplete outcome data (attrition bias) | Selective reporting (reporting bias) | Other bias |
|-----------------------|---------------------------------------------|-----------------------------------------|-----------------------------------------------------------|------------------------------------------|--------------------------------------|------------|
| Bidzan 2012           | ?                                           | ?                                       | +                                                         | +                                        | +                                    | ?          |
| Mahableshwarkar 2014a | ?                                           | ?                                       | +                                                         | +                                        | +                                    | ?          |
| Mahableshwarkar 2014b | +                                           | +                                       | +                                                         | +                                        | +                                    | ?          |
| Rothschild 2012       | +                                           | +                                       | +                                                         | +                                        | +                                    | ?          |

**e-Figure 2:** Summarized risks of bias for the included studies.

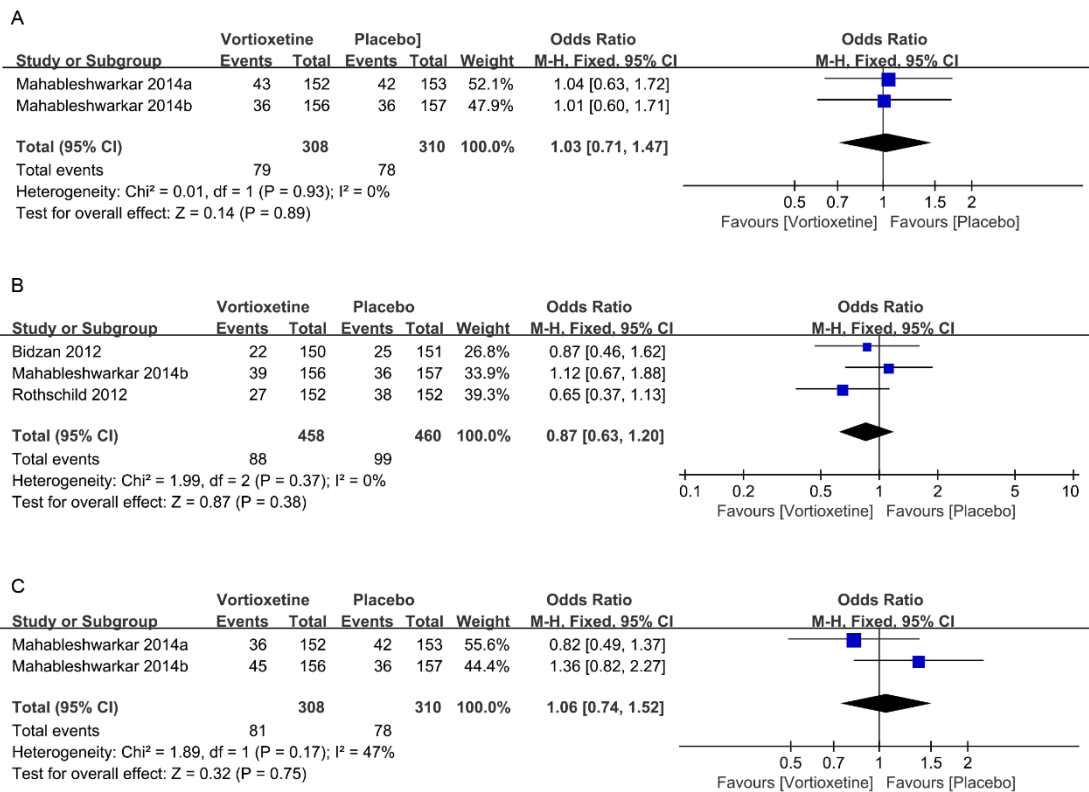

**e-Figure 3:** Odds ratios (ORs) and 95% confidence intervals (CIs) of the selected studies and the pooled data, comparing the discontinuation rates for any reason, between the vortioxetine and placebo groups.

Notes: (A) 2.5-mg/day vortioxetine versus placebo, (B) 5-mg/day vortioxetine versus placebo, and (C) 10-mg/day vortioxetine versus placebo.

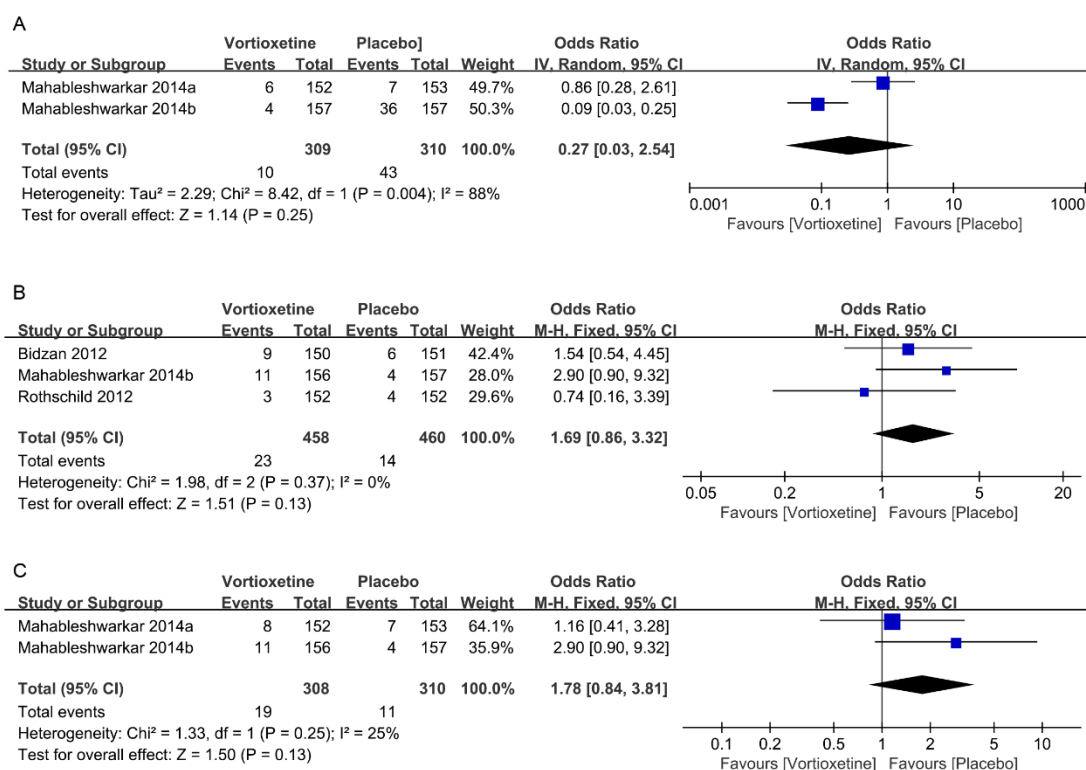

**e-Figure 4:** Odds ratios (ORs) and 95% confidence intervals (CIs) of the selected studies and the pooled data, comparing the discontinuation rates due to adverse events (AEs), between vortioxetine and placebo groups.

Notes: (A) 2.5-mg/day vortioxetine versus placebo, (B) 5-mg/day vortioxetine versus placebo, and (C) 10-mg/day vortioxetine versus placebo.



# PRISMA 2009 Checklist

| Section/topic                      | #  | Checklist item                                                                                                                                                                                                                                                                                              | Reported on page # |
|------------------------------------|----|-------------------------------------------------------------------------------------------------------------------------------------------------------------------------------------------------------------------------------------------------------------------------------------------------------------|--------------------|
| <b>TITLE</b>                       |    |                                                                                                                                                                                                                                                                                                             |                    |
| Title                              | 1  | Identify the report as a systematic review, meta-analysis, or both.                                                                                                                                                                                                                                         | 1                  |
| <b>ABSTRACT</b>                    |    |                                                                                                                                                                                                                                                                                                             |                    |
| Structured summary                 | 2  | Provide a structured summary including, as applicable: background; objectives; data sources; study eligibility criteria, participants, and interventions; study appraisal and synthesis methods; results; limitations; conclusions and implications of key findings; systematic review registration number. | 2                  |
| <b>INTRODUCTION</b>                |    |                                                                                                                                                                                                                                                                                                             |                    |
| Rationale                          | 3  | Describe the rationale for the review in the context of what is already known.                                                                                                                                                                                                                              | 3                  |
| Objectives                         | 4  | Provide an explicit statement of questions being addressed with reference to participants, interventions, comparisons, outcomes, and study design (PICOS).                                                                                                                                                  | 3-4                |
| <b>METHODS</b>                     |    |                                                                                                                                                                                                                                                                                                             |                    |
| Protocol and registration          | 5  | Indicate if a review protocol exists, if and where it can be accessed (e.g., Web address), and, if available, provide registration information including registration number.                                                                                                                               | 4                  |
| Eligibility criteria               | 6  | Specify study characteristics (e.g., PICOS, length of follow-up) and report characteristics (e.g., years considered, language, publication status) used as criteria for eligibility, giving rationale.                                                                                                      | 4                  |
| Information sources                | 7  | Describe all information sources (e.g., databases with dates of coverage, contact with study authors to identify additional studies) in the search and date last searched.                                                                                                                                  | 4                  |
| Search                             | 8  | Present full electronic search strategy for at least one database, including any limits used, such that it could be repeated.                                                                                                                                                                               | 4                  |
| Study selection                    | 9  | State the process for selecting studies (i.e., screening, eligibility, included in systematic review, and, if applicable, included in the meta-analysis).                                                                                                                                                   | 4-5                |
| Data collection process            | 10 | Describe method of data extraction from reports (e.g., piloted forms, independently, in duplicate) and any processes for obtaining and confirming data from investigators.                                                                                                                                  | 5                  |
| Data items                         | 11 | List and define all variables for which data were sought (e.g., PICOS, funding sources) and any assumptions and simplifications made.                                                                                                                                                                       | 5                  |
| Risk of bias in individual studies | 12 | Describe methods used for assessing risk of bias of individual studies (including specification of whether this was done at the study or outcome level), and how this information is to be used in any data synthesis.                                                                                      | 5                  |
| Summary measures                   | 13 | State the principal summary measures (e.g., risk ratio, difference in means).                                                                                                                                                                                                                               | 6                  |
| Synthesis of results               | 14 | Describe the methods of handling data and combining results of studies, if done, including measures of consistency (e.g., I <sup>2</sup> ) for each meta-analysis.                                                                                                                                          | 6                  |



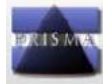

# PRISMA 2009 Checklist

Page 1 of 2

| Section/topic                 | #  | Checklist item                                                                                                                                                                                           | Reported on page # |
|-------------------------------|----|----------------------------------------------------------------------------------------------------------------------------------------------------------------------------------------------------------|--------------------|
| Risk of bias across studies   | 15 | Specify any assessment of risk of bias that may affect the cumulative evidence (e.g., publication bias, selective reporting within studies).                                                             | 5-6                |
| Additional analyses           | 16 | Describe methods of additional analyses (e.g., sensitivity or subgroup analyses, meta-regression), if done, indicating which were pre-specified.                                                         | 5-6                |
| <b>RESULTS</b>                |    |                                                                                                                                                                                                          |                    |
| Study selection               | 17 | Give numbers of studies screened, assessed for eligibility, and included in the review, with reasons for exclusions at each stage, ideally with a flow diagram.                                          | 6                  |
| Study characteristics         | 18 | For each study, present characteristics for which data were extracted (e.g., study size, PICOS, follow-up period) and provide the citations.                                                             | 6                  |
| Risk of bias within studies   | 19 | Present data on risk of bias of each study and, if available, any outcome level assessment (see item 12).                                                                                                | 7                  |
| Results of individual studies | 20 | For all outcomes considered (benefits or harms), present, for each study: (a) simple summary data for each intervention group (b) effect estimates and confidence intervals, ideally with a forest plot. | 7-8                |
| Synthesis of results          | 21 | Present results of each meta-analysis done, including confidence intervals and measures of consistency.                                                                                                  | 7-8                |
| Risk of bias across studies   | 22 | Present results of any assessment of risk of bias across studies (see Item 15).                                                                                                                          | 7                  |
| Additional analysis           | 23 | Give results of additional analyses, if done (e.g., sensitivity or subgroup analyses, meta-regression [see Item 16]).                                                                                    | 7-8                |
| <b>DISCUSSION</b>             |    |                                                                                                                                                                                                          |                    |
| Summary of evidence           | 24 | Summarize the main findings including the strength of evidence for each main outcome; consider their relevance to key groups (e.g., healthcare providers, users, and policy makers).                     | 8-9                |
| Limitations                   | 25 | Discuss limitations at study and outcome level (e.g., risk of bias), and at review-level (e.g., incomplete retrieval of identified research, reporting bias).                                            | 10                 |
| Conclusions                   | 26 | Provide a general interpretation of the results in the context of other evidence, and implications for future research.                                                                                  | 10                 |
| <b>FUNDING</b>                |    |                                                                                                                                                                                                          |                    |
| Funding                       | 27 | Describe sources of funding for the systematic review and other support (e.g., supply of data); role of funders for the systematic review.                                                               | 10                 |

From: Moher D, Liberati A, Tetzlaff J, Altman DG, The PRISMA Group (2009). Preferred Reporting Items for Systematic Reviews and Meta-Analyses: The PRISMA Statement. PLoS Med 6(7): e1000097. doi:10.1371/journal.pmed1000097

For more information, visit: [www.prisma-statement.org](http://www.prisma-statement.org).

Page 2 of 2

For peer review only - <http://bmjopen.bmj.com/site/about/guidelines.xhtml>

# BMJ Open

## Vortioxetine Treatment for Generalized Anxiety Disorder: A Meta-Analysis of Anxiety, Quality of Life, and Safety Outcomes

|                                 |                                                                                                                                                                                                                                                                                                                                                                                                                                                                                                                                                                                                                                                                                                                                                                                                                                |
|---------------------------------|--------------------------------------------------------------------------------------------------------------------------------------------------------------------------------------------------------------------------------------------------------------------------------------------------------------------------------------------------------------------------------------------------------------------------------------------------------------------------------------------------------------------------------------------------------------------------------------------------------------------------------------------------------------------------------------------------------------------------------------------------------------------------------------------------------------------------------|
| Journal:                        | <i>BMJ Open</i>                                                                                                                                                                                                                                                                                                                                                                                                                                                                                                                                                                                                                                                                                                                                                                                                                |
| Manuscript ID                   | bmjopen-2019-033161.R2                                                                                                                                                                                                                                                                                                                                                                                                                                                                                                                                                                                                                                                                                                                                                                                                         |
| Article Type:                   | Original research                                                                                                                                                                                                                                                                                                                                                                                                                                                                                                                                                                                                                                                                                                                                                                                                              |
| Date Submitted by the Author:   | 17-Oct-2019                                                                                                                                                                                                                                                                                                                                                                                                                                                                                                                                                                                                                                                                                                                                                                                                                    |
| Complete List of Authors:       | Bin, Qin; Affiliated Liuzhou General Hospital of Guangxi University of Science and Technology<br>Huang, Guangsu; Affiliated Liuzhou General Hospital of Guangxi University of Science and Technology, Department of Neurology<br>Yang, Qian; Affiliated Liuzhou General Hospital of Guangxi University of Science and Technology, Department of Neurology<br>Zhao, Mingjun; The Second Affiliated Hospital of Xinxiang Medical University<br>Chen, Hong; Affiliated Liuzhou General Hospital of Guangxi University of Science and Technology, Department of Neurology<br>Gao, Wen; Affiliated Liuzhou General Hospital of Guangxi University of Science and Technology, Department of Neurology<br>Yang, Mingxiu; Affiliated Liuzhou General Hospital of Guangxi University of Science and Technology, Department of Neurology |
| <b>Primary Subject Heading</b>: | Mental health                                                                                                                                                                                                                                                                                                                                                                                                                                                                                                                                                                                                                                                                                                                                                                                                                  |
| Secondary Subject Heading:      | Pharmacology and therapeutics, Mental health                                                                                                                                                                                                                                                                                                                                                                                                                                                                                                                                                                                                                                                                                                                                                                                   |
| Keywords:                       | Multimodal therapy, Generalized anxiety disorder, Vortioxetine, Meta-analysis                                                                                                                                                                                                                                                                                                                                                                                                                                                                                                                                                                                                                                                                                                                                                  |
|                                 |                                                                                                                                                                                                                                                                                                                                                                                                                                                                                                                                                                                                                                                                                                                                                                                                                                |

SCHOLARONE™  
Manuscripts

1  
2  
3  
4  
5  
6  
7  
8  
9  
10  
11  
12  
13  
14  
15  
16  
17  
18  
19  
20  
21  
22  
23  
24  
25  
26  
27  
28  
29  
30  
31  
32  
33  
34  
35  
36  
37  
38  
39  
40  
41  
42  
43  
44  
45  
46  
47  
48  
49  
50  
51  
52  
53  
54  
55  
56  
57  
58  
59  
60

1 **Vortioxetine Treatment for Generalized Anxiety Disorder: A Meta-Analysis of**  
2 **Anxiety, Quality of Life, and Safety Outcomes**

3

4

5 Bin Qin,<sup>1</sup> Guangsu Huang,<sup>1</sup> Qian Yang,<sup>1</sup> Mingjun Zhao,<sup>2</sup> Hong Chen,<sup>1</sup> Wen Gao,<sup>1</sup> Mingxiu Yang<sup>1</sup>

6

7

8 **Author affiliations**

9 <sup>1</sup>Department of Neurology, Affiliated Liuzhou General Hospital of Guangxi University of Science and  
10 Technology (Liuzhou General Hospital), Liuzhou 545006, Guangxi, China,

11 <sup>2</sup>Department of Pharmacy, The Second Affiliated Hospital of Xinxiang Medical University (Henan Mental  
12 Hospital), Xinxiang 453000, China.

13

14 Correspondence to Professor Mingxiu Yang; lzrmyyymx@126.com.

15

16

17 Bin Qin, Guangsu Huang and Qian Yang contributed equally to this study

18

19

20

**Abstract:**

**Objectives** The aim of this study was to investigate the efficacy, tolerability, safety, and impact on quality of life (QoL) and functional status of vortioxetine treatment for patients with generalized anxiety disorder (GAD) by performing a meta-analysis of randomized controlled trials.

**Design** Systematic review and meta-analysis.

**Data sources** Data mining was conducted in January 2019 across PubMed, EMBASE, PsycINFO, Cochrane Central Register of Controlled Trials Cochrane Library, Web of science, and ClinicalTrials.gov.

**Eligibility criteria for selecting studies** All published Randomized controlled trials (RCTs) which assessed the effect of vortioxetine treatment for patients with GAD when compared with a placebo group were included.

**Data extraction and synthesis** Relevant data was extracted and synthesized narratively. Results were expressed as standardized mean differences (SMDs) or odds ratios (ORs) with 95% confidence intervals (CIs).

**Results** Our meta-analysis showed that multiple doses (2.5, 5, and 10 mg/day) of vortioxetine did not significantly improve the response rates, compared to placebo (OR = 1.16, 95% CI=0.84–1.60, P=0.38; OR = 1.41, 95% CI=0.82–2.41, P=0.21; and OR = 1.05, 95% CI=0.76–1.46, P=0.75). Moreover, there was no statistically significant difference regarding the remission rates, discontinuation for any reason rates, discontinuation due to adverse events rates, Short Form 36 Health Survey scores, or Sheehan Disability Scale scores between administration of multiple doses (2.5, 5, and 10 mg/day) of vortioxetine and placebo.

**Conclusions** Although our results suggest that vortioxetine did not improve the generalized anxiety disorder symptoms, QoL and functional status impairment of patients with GAD, it was safe and well tolerated. Clinicians should interpret and translate our data with caution, as the meta-analysis was based on a limited number of randomized controlled trials.

**Keywords:** Multimodal therapy; Generalized anxiety disorder; Vortioxetine; Meta-analysis

**Word count:** 3548.

**Strengths and limitations of this study**

► This systematic review and meta-analysis provides evidence for the efficacy, tolerability, and safety of vortioxetine in treatment of patients with generalized anxiety disorder

► Improvement of quality of life and functional status impairment were also evaluated to judge the patients' well-being of vortioxetine.

► Strong and reliable methodological and statistical procedures were applied.

► Due to the short-term follow-up in the evaluated studies, the long-term effect was not studied.

## 1 Introduction

2 Generalized anxiety disorder (GAD) is a common, chronic, costly, and disabling mental disorder which is  
3 marked by persistent anxiety and worry, and multiple psychological and physical symptoms.<sup>1,2</sup> It is also  
4 characterized by various psychological and somatic complaints, such as autonomic arousal, restlessness,  
5 fatigue, problems with concentration, irritability, and sleeplessness.<sup>1</sup> The estimated 1-year prevalence rate  
6 of GAD is between 1.2% and 1.9%, and the lifetime prevalence is between 4.3% and 5.9%.<sup>2,3</sup> Since most  
7 patients are still affected for 6 to 12 years after diagnosis, GAD is usually considered a chronic disorder and  
8 a major burden on the individual, their family, and health care services.<sup>2,4</sup> Anxiety is a common  
9 comorbidity of chronic medical diseases including atopic dermatitis, asthma, rheumatoid arthritis, lupus  
10 and stroke. Anxiety has a negative impact on the quality of life of patients suffer from chronic diseases.<sup>5,6</sup>

11 Vortioxetine is a multimodal antidepressant that was approved for the treatment of major depressive  
12 disorder (MDD), by the US Food and Drug Administration (FDA) in September 2013. Vortioxetine's  
13 mechanism of action is related to its multimodal activity, which combines two pharmacological properties:  
14 direct modulation of receptor activity and inhibition of the 5-HT transporter, and thereby with potential  
15 benefits in the treatment of major depressive episode and, probably, GAD and anxiety disorders.<sup>7</sup> In  
16 addition, vortioxetine cause significant increase in the hippocampal Brain Derived Neurotrophic Factors  
17 levels as compared with selective serotonin reuptake inhibitors.<sup>8</sup> Several meta-analyses have proved the  
18 efficacy of vortioxetine in treatment of MDD.<sup>9-11</sup> A recent scientometric analysis reported that the  
19 popularity of vortioxetine is rising.<sup>12</sup> Clinical trials evaluating its efficacy for the treatment of GAD, with  
20 doses up to 10 mg/day, have also yielded some interesting findings.<sup>13-16</sup> Moreover, as vortioxetine has been  
21 proven to be efficient in the treatment of MDD comorbid with GAD, it is possible that it constitutes an  
22 effective treatment for GAD alone, as well.<sup>17</sup>

23 Interestingly, the efficacy of vortioxetine therapy in reducing anxiety symptom severity in GAD is  
24 summarized in two previous meta-analyses.<sup>18,19</sup> Both reviews analyzed its efficacy only in terms of  
25 symptom severity on the underlying continuous rating scales, and did not assess dichotomous outcomes of  
26 response and remission rates. However, a recent meta-analysis examined the efficacy of multiple doses of  
27 vortioxetine in terms of dichotomous response outcomes, and the results showed no significant  
28 improvement in the outcomes of treating GAD with vortioxetine compared to treating GAD with placebo.<sup>20</sup>  
29 The efficacy was only assessed using continuous rating scales or dichotomous response; thus, the authors  
30 of these meta-analyses and of a relevant narrative review noted that a comprehensive summary of efficacy  
31 data is missing. Further, both these reviews only provided an assessment of efficacy and safety outcomes,  
32 and did not include important outcomes of patient-focused assessments, such as assessment of functional  
33 impairment and quality of life (QoL). Currently there is growing interest in assessing the QoL and  
34 functional status impairment in patients with psychological disorders.<sup>21,22</sup> In addition, the importance of  
35 including such assessments in evaluations of the influence of psychological disorders and their treatment, is  
36 widely recognized.<sup>23-26</sup> Our previous network meta-analysis concluded that risperidone and aripiprazole  
37 improved the QoL of patients with treatment-resistant depression.<sup>27</sup> Despite the growing interest in the

1 field, studies addressing the impairment of QoL and functional status caused by anxiety disorders have  
2 progressed slowly.<sup>28</sup> Moreover, GAD is an important public mental health problem that causes poor QoL  
3 and functional status impairment,<sup>23</sup> with substantial impact on work and social roles.<sup>29</sup> Thus, the outcome  
4 of post-treatment QoL assessments is recognized as an important measure of treatment efficacy for patients  
5 with GAD.<sup>30</sup>

6 The assessment of antianxiety therapy benefits on QoL and functional status impairment in patients  
7 with GAD is becoming increasingly common in clinical studies, mainly because, both aspects are important  
8 for the patients' overall well-being and recovery. Currently, the direct effect of vortioxetine treatment on  
9 QoL and functional status impairment in patients with GAD is unclear. Therefore, this meta-analysis was  
10 conducted to provide a comprehensive estimate of the efficacy, safety, and improving QoL and functional  
11 status impairment profiles of vortioxetine in treatment of GAD.

## 12 13 **Methods**

14 All steps of this review were performed in strict accordance with the Cochrane Handbook for Systematic  
15 Reviews of Interventions.<sup>31</sup> The PRISMA statement guidelines were followed during the meta-analysis and  
16 preparation of this review.<sup>32</sup>

### 17 18 **Search strategy**

19 As of January 2019, we searched PubMed, EMBASE, PsycINFO, Cochrane Central Register of Controlled  
20 Trials (Cochrane Library), Web of science, and ClinicalTrials.gov (www.clinicaltrials.gov). Search terms  
21 included “vortioxetine OR Lu AA21004” OR Brintellix” AND “anxiety OR anxiety disorder OR anxiety  
22 disorders OR mood disorder OR mood disorders.” (Supplementary Table 1) No language or time  
23 restrictions were applied. Titles and abstracts were screened by two independent reviewers, before full texts  
24 of potentially relevant articles were retrieved for further evaluation. The decision to include a study was  
25 then made by two independent reviewers (BQ and WG), after full-text review. The reference lists of  
26 included articles were further hand-searched to identify additional relevant articles.

### 27 28 **Eligibility Criteria and Study Selection**

29 We included all clinical trials meeting the following criteria: (a) randomized controlled trials  
30 (RCTs) involving patients ( $\geq 18$  years old) primarily diagnosed with GAD, according to the criteria of the  
31 Diagnostic and Statistical Manual of Mental Disorders, fourth edition, text revision (DSM-IV-TR), and (b)  
32 RCTs comparing outcomes in efficacy, QoL, and functional impairment between vortioxetine and placebo.  
33 We excluded (a) retrospective and observational studies; (b) non-human studies; (c) theses and conference  
34 abstracts; and (d) studies including patients that had any concurrent psychiatric disorders with GAD or any  
35 prior history of psychiatric disorders, such as manic or hypomanic episodes, schizophrenia, or substance  
36 use disorders. Eligibility screening was performed in two steps, each by two independent reviewers (BQ  
37 and WG): (a) title and abstract screening for relevance to the study objective, and (b) full text screening for

1 eligibility for a meta-analysis. Conflicts were resolved by the opinion of a third reviewer (MY).

### 3 **Outcomes**

#### 4 Efficacy measures

5 Response was defined across studies as a 50% improvement of the Hamilton Anxiety Rating Scale (HAM-  
6 A) total score from baseline to end point. Remission was defined as a HAM-A total score of  $\leq 7$  at the  
7 study end point. The continuous measure of efficacy was the mean change from baseline in total scores on  
8 the HAM-A, as defined by the individual study.

#### 10 Safety and tolerability measures

11 Data on the discontinuation for any reason (tolerability) and the numbers of discontinuation due to adverse  
12 events (AEs) (safety) were included in the analysis.

#### 14 QoL and functioning measures

15 QoL can be assessed by study-designed questionnaires and disease-specific or generic instruments. These  
16 instruments assess an individual's physical, emotional, psychological, and social health.<sup>33,34</sup> We selected  
17 the Short Form 36 Health Survey (SF-36)<sup>35</sup> scores as the outcome indicator for QoL to preserve sufficient  
18 homogeneity for meta-analysis, because this instrument is used to measure QoL for the GAD population in  
19 many studies. Studies were excluded if the QoL outcome was reported by the other rating scales. The  
20 Sheehan Disability Scale (SDS),<sup>36</sup> a reliable, valid, brief, self-report scale that assesses disability in work,  
21 social, and family life, is the only measure of functional impairment employed by the trials included in this  
22 meta-analysis.

### 24 **Data Extraction**

25 Two independent reviewers (BQ and WG) extracted the following data from the included studies: (a)  
26 baseline characteristics of enrolled patients, (b) general characteristics of the study design, (c) information  
27 on efficacy, safety, tolerability, QoL, and functioning outcome. Data were summarized by one investigator  
28 and checked by a second reviewer. Any discrepant data were, again, examined by a third reviewer (MY), to  
29 ensure accurate data were obtained.

### 31 **Risk of Bias Assessment**

32 The risk of bias within each study was assessed by two independent reviewers (BQ and WG) using the  
33 Cochrane Risk of Bias assessment tool, as described in the Cochrane Handbook for Systematic Reviews of  
34 Interventions 5.1.0.<sup>31</sup> This tool classifies the studies as having low, unclear, or high risk of bias across six  
35 domains: sequence generation, allocation concealment, blinding, missing data, selective reporting, and  
36 other biases.

## **Data Analysis**

The meta-analysis was conducted using RevMan 5.3 software (Cochrane Collaboration, London, UK) and Stata 13.0 software (StataCorp LP, College Station, TX, USA). Odds ratios (ORs) and 95% CIs were used to assess binary outcomes, such as response, remission rates, as well as discontinuation for any reason rates. In addition, we converted continuous data to standardized mean differences (SMDs) and 95% CIs. The statistical heterogeneity among trials was measured by Q statistics and the  $I^2$  test. Higher  $I^2$  values indicate greater heterogeneity, with  $I^2$  values of 25, 50, and 75% signifying mild, moderate, and high heterogeneity, respectively.<sup>37,38</sup> Based on heterogeneity, data were pooled to estimate the overall effect of all the interventions by random-effect or fixed-effect modelling. Fixed-effect models assume that the population effect sizes are the same for all studies. In contrast, random-effects model attempted to generalize findings beyond the included studies by assuming that the selected studies are random samples from a larger population.<sup>39</sup> Sensitivity analyses were performed to test the impact robustness of every single study on the overall results. Publication bias could be assessed by visual inspection of a funnel plot, and the Egger test was also used to evaluate publication biases. However, according to Egger and colleagues, assessing publication bias using the funnel plot-based methods is not reliable when fewer than 10 pooled studies are used in the direct comparison.<sup>40</sup>

## **Patient and public involvement**

Patients or the public were not involved in the conceptualisation or carrying out of this research.

## **Results**

### **Search results**

We identified 94 references from the electronic literature search. After screening the titles and abstracts, 85 were excluded because they failed to meet the inclusion criteria. By reading the full text of the remaining nine articles, five more were excluded: one study included patients with depression, one study focused on vortioxetine in the prevention of relapse of GAD, another one constituted a conference abstract and did not provide treatment outcomes, and two studies were eliminated because they were review articles. Ultimately, only four studies that fully satisfied the pre-established inclusion criteria of this meta-analysis were included (see Supplementary Figure 1).<sup>13-16</sup>

### **Study Characteristics**

Four included studies were published between 2012 and 2014 (Table 1).<sup>13-16</sup> The collective patient population comprised 1074 individuals in the vortioxetine group and 613 individuals in the placebo group. The administered doses of vortioxetine were 2.5, 5, and 10 mg/day. The mean age of participants ranged from 36.8 to 45.3 years. All studies were characterized by a preponderance of female subjects, with proportions ranging from 60 to 70%. The main characteristics of these studies are presented in Table 1.



## Study Quality

The risks of bias in each study is summarized in Supplementary Figure 2. All studies claimed randomization and three articles described the method of random sequence generation (random number table, computer generated). Three trials provided information that allowed us to assess whether an adequate concealment of the allocation procedure was used. All studies reported the blinding of participants. Therefore, all trials were deemed to have a mild-to-moderate risk of bias.

## Efficacy

In terms of response, a total of four studies were included in the analysis; the overall ORs observed for groups treated with multiple doses (2.5, 5, and 10 mg/day) of vortioxetine compared to placebo were 1.16 (95% CI=0.84–1.60, Z=0.89, P=0.38), 1.41 (95% CI=0.82–2.41, Z=1.25, P=0.21), and 1.05 (95% CI=0.76–1.46, Z=0.32, P=0.75), respectively (Figure 1). The results showed that there was no statistically significant difference in the response rates among the vortioxetine- and placebo groups. In addition, there was no statistically significant difference for the remission rates in multiple doses (2.5, 5, and 10 mg/d) of vortioxetine compared to placebo (Figure 2).

Pooled effect sizes for the mean change from baseline in total scores on the HAM-A are provided in Figure 3. The overall SMDs observed for the groups treated with multiple doses (2.5, 5, and 10 mg/d) of vortioxetine compared to the placebo were -0.13 (95% CI=-0.29–0.03, Z=1.56, P=0.12), -0.15 (95% CI=-0.48–0.18, Z=0.87, P=0.38), and -0.08 (95% CI=-0.24–0.08, Z=1.01, P=0.31), respectively. The results also showed that there was no statistically significant difference in the mean change from baseline in total scores on the HAM-A among the vortioxetine and placebo groups.

## Tolerability and safety

No significant difference was observed between the vortioxetine and placebo groups in terms of the likelihood of discontinuation for any reason (tolerability). The overall ORs observed for the groups treated with multiple doses (2.5, 5, and 10 mg/day) of vortioxetine compared to the placebo-treated group were 1.03 (95% CI=0.71–1.47, Z=0.14, P=0.89), 0.87 (95% CI=0.63–1.20, Z=0.87, P=0.38), and 1.06 (95% CI=0.74–1.52, Z=0.32, P=0.75), respectively (Supplementary Figure 3). Additionally, there was no statistically significant difference in the discontinuation due to AEs (safety) between the groups treated with multiple doses (2.5, 5, and 10 mg/day) of vortioxetine and the group treated with placebo (Supplementary Figure 4).

## Quality of life and functional status results

Three studies in this analysis reported SF-36 scores as the outcome measure of QoL. The overall SMDs of groups treated with multiple doses (2.5, 5, and 10 mg/d) of vortioxetine compared to placebo were 0.12

(95% CI=-0.11-0.35, Z=1.04, P=0.30), 0.22 (95% CI=-0.12-0.56, Z=1.26, P=0.21), and 0.09 (95% CI=-0.14-0.32, Z=0.75, P=0.45), respectively (Figure 4). The results showed that there was no statistically significant difference in SF-36 scores among the different groups. SDS scores were available for all four studies included in this analysis. The overall SMDs for the groups treated with multiple doses (2.5, 5, and 10 mg/d) of vortioxetine compared to placebo were -0.11 (95% CI=-0.30-0.08, Z=1.09, P=0.28), -0.10 (95% CI=-0.27-0.06, Z=1.27, P=0.21), and -0.20 (95% CI=-0.39-0.00, Z=2.00, P=0.05), respectively (Figure 5). The results showed that there was no statistically significant difference in SDS among the different groups.

### Publication bias

The Egger test showed no significant difference main outcomes, indicating no publication bias.

### Discussion

In this meta-analysis of 4 randomized trials studying vortioxetine as a treatment for GAD, we found that vortioxetine (2.5-, 5- and 10-mg once-daily doses) did not significantly improve GAD symptoms, quality of life and functional status compared to a placebo treatment. However, vortioxetine might be safe and well tolerated in this patient population. Our findings have some clinical implications for comprehensively understanding the risk–benefit profiles of vortioxetine treatment for GAD.

Our results are not consistent with those of the previous meta-analysis conducted by Pae et al, as that study found that vortioxetine was significantly more effective than the placebo.<sup>18</sup> In their study, they only performed the analysis of mean change from baseline in total scores on the HAM-A, and included all randomized subjects. However, our meta-analysis was separately conducted according to the doses of vortioxetine, and we assessed the efficacy in terms of mean change from baseline in total scores on the HAM-A, response rates, and remission rates. Doses of vortioxetine may be clinically important factors for its efficacy in GAD patients. Thus, the results of our meta-analysis were more reliable and stable. Moreover, a recent meta-analysis showed that there was no statistically significant difference regarding the response rates among groups treated with either multiple doses (2.5, 5, and 10 mg/day) of vortioxetine or a placebo.<sup>41</sup> Furthermore, the results of our meta-analysis demonstrated no statistically significant difference in the mean change from baseline in total scores on the HAM-A, remission rates, quality of life, and functional status among the groups. Thus, the results of our meta-analysis were more comprehensive.

Several reasons for these outcomes may have contributed to the negative results. A previous analysis of the Food and Drug Administration database concluded that negative results were commonly seen in anxiolytic agents administered for the treatment of anxiety disorders, including GAD, where less than one-half (48%) of the treatment arms were statistically superior to the placebo.<sup>42</sup> In this case, all anxiolytic agents included in the study are approved for GAD treatment in the United States, but only three out of seven treatment arms were separated from the placebo. Moreover, the results some studies have found that negative results<sup>14-16</sup> had a higher placebo response rate than those with positive results.<sup>13,43</sup> Although this

1 correlation has not been established in GAD, it is reasonable to speculate that an elevated placebo response  
2 could reduce the treatment effect. Unfortunately, because no positive control was included in our meta-  
3 analysis, it is impossible to determine the lack-of-treatment effect. In addition, the racial diversity may have  
4 introduced differences in response and remission rates; for example, the studied population of the trial that  
5 showed negative results was racially diverse, whereas the population of the trial that showed positive  
6 results was almost entirely Caucasian. Hence, the results of the STAR\*D study demonstrate that non-  
7 Caucasians were significantly less likely to achieve remission.<sup>44</sup> Furthermore, the mean baseline HAM-A  
8 total scores in most of the included studies were relatively high (ranging from 24.5 to 27); inflated baseline  
9 HAM-A total scores are a possible consequence of less stringent screening practices. Relative to placebo,  
10 vortioxetine treatment, in doses of 10 and 20 mg, demonstrated significant improvement in depressive  
11 symptoms, however, the RCTs that were studied, in accordance with those included in our meta-analysis,  
12 used the optimal doses of 2.5-10 mg. Higher dosages, such as 20 mg or even more, would be more  
13 beneficial in anxiety disorders, whereas lower dosages may unaffected anxiety symptoms. However, it is  
14 unlikely that any single reason can explain the inconsistent results observed in the vortioxetine for GAD.

15 Although our meta-analysis did not demonstrate a statistically significant anxiolytic effect of  
16 vortioxetine, it did provide information regarding drug tolerability. Our study found that there was no  
17 statistically significant difference for the discontinuation for any reason rates and discontinuation due to  
18 AEs rates among groups receiving either multiple doses (2.5, 5, and 10 mg/day) of vortioxetine compared  
19 to placebo, which is similar to the findings of a previous meta-analysis.<sup>9,18</sup> Thus, the vortioxetine doses  
20 were well tolerated, and were associated with similar discontinuation for any reason rates and  
21 discontinuation due to AEs rates when compared to the placebo.

22 GAD is associated with significant functional impairment in many areas, including social, occupational,  
23 and mental consequences; and when combined with physical impairment, together they influence QoL. The  
24 effectiveness of GAD treatment for improving QoL and functional outcomes is potentially confounded by  
25 the bidirectional relationship of anxiety symptoms and QoL/functional impairment. This is the first meta-  
26 analysis to report prospective assessment of QoL/functional status impairment for vortioxetine in treatment  
27 of patients with GAD. Unfortunately, our meta-analysis of RCTs with GAD patients showed no significant  
28 improvement in the aforementioned aspects after vortioxetine treatment compared to after treatment with  
29 the placebo. Our results are not consistent with those of a previous meta-analysis of the effect of  
30 vortioxetine treatment on overall functioning in patients with MDD.<sup>45</sup> The meta-analysis, conducted by  
31 Florea et al, demonstrated that vortioxetine, in doses of 5-20 mg for 6/8 weeks, improved overall  
32 functioning in patients with MDD. Relative to placebo, vortioxetine treatment, in doses of 10 and 20 mg,  
33 demonstrated significant improvement in SDS total score and functional remission. However, the RCTs  
34 that were studied, in accordance with those included in our meta-analysis, used the optimal doses of 2.5-10  
35 mg. Thus, the reason for the lack of congruence between these two meta-analyses may be the difference in  
36 the optimal doses. Meanwhile, a recent meta-analysis of vortioxetine in working patients with GAD,<sup>46</sup>  
37 showed that vortioxetine benefits adult patients who are working and/or pursuing an education. Thus,

1  
2  
3 1 future research should be directed to provide more RCTs, specifically targeted to individuals with GAD, in  
4 2 order to assess the efficacy of vortioxetine in a larger sample, as well as to define the best therapeutic  
5 3 dosage.

6 4 The results of our meta-analysis should be interpreted in light of the following potential limitations.  
7 5 First, we included only four RCTs, which may have influenced the reliability of the results. Second, the  
8 6 duration of each trial included in our meta-analysis was 8 weeks; this is an important issue because GAD  
9 7 patients typically require long-term pharmacological treatment. We found only one study focusing on long-  
10 8 term relapse prevention, which showed no significant improvement of relapse prevention effect after long-  
11 9 term (maintenance) vortioxetine treatment for GAD compared to placebo.<sup>47</sup> Furthermore, the systematic  
12 10 review, conducted by Perna et al, indicated that although some recent data support the long-term efficacy of  
13 11 vortioxetine for GAD and showed a favorable tolerability profile, the conflicting short-term studies and  
14 12 limited clinical experience recommend its use only as second-line therapy.<sup>48</sup> In addition, owing to a limited  
15 13 number of studies included in our meta-analysis, we did not compare the onset time between the groups  
16 14 treated with multiple doses of vortioxetine and placebo. Finally, all the included trials were supported by  
17 15 the Takeda Pharmaceutical Company Ltd. as part of a joint clinical development program with H.  
18 16 Lundbeck A/S, which may have also influenced the results.

## 17 18 **Conclusions**

19 19 In summary, GAD is an illness that is characterized not only by severe anxiety symptoms, but also by  
20 20 diminished functioning and QoL. The challenge for interventions is not only to achieve improvement of  
21 21 symptoms, but also to enhance patients' functioning ability and QoL. Our comprehensive evaluation of  
22 22 efficacy, safety, and impact on QoL provides a critical insight that may be useful for clinicians attempting  
23 23 to thoroughly understand the risk–benefit profiles of vortioxetine treatment for GAD. Vortioxetine did not  
24 24 significantly improve GAD symptoms and QoL as compared to the placebo; nevertheless, it was safe and  
25 25 well tolerated in this patient population. However, our results should be interpreted and translated into  
26 26 clinical practice with caution, owing to the limited number of RCTs included in the present meta-analysis.

27  
28 28 **Acknowledgments** We thank Editage (www.editage.cn) for editing the English text of a draft of this  
29 29 manuscript.

30 30 **Contributors** BQ, GH, QY and MY were involved in conceptualisation and design of the study and critical  
31 31 review of the manuscript. BQ, GH and MY performed the data extraction. BQ, MZ, HC and WG conceived  
32 32 the study and reviewed the manuscript for important intellectual content. All authors approved the final  
33 33 manuscript as submitted.

34 34 **Funding** The authors have not declared a specific grant for this research from any funding agency in the  
35 35 public, commercial or not-for-profit sectors.

36 36 **Competing interests** None declared.

37 37 **Patient consent for publication** Not required.

1  
2  
3  
4  
5  
6  
7  
8  
9  
10  
11  
12  
13  
14  
15  
16  
17  
18  
19  
20  
21  
22  
23  
24  
25  
26  
27  
28  
29  
30  
31  
32  
33  
34  
35  
36  
37  
38  
39  
40  
41  
42  
43  
44  
45  
46  
47  
48  
49  
50  
51  
52  
53  
54  
55  
56  
57  
58  
59  
60

1  
2  
3

**Data sharing statement** Additional data can be requested by emailing [lzrmyyymx@126.com](mailto:lzrmyyymx@126.com).

For peer review only

## References

1. American Psychiatric Association. Diagnostic and Statistical Manual of Mental Disorders (DSM-5), Fifth Edition. Washington, DC: American Psychiatric Association; 2013.
2. Tyrer P, Baldwin D. Generalised anxiety disorder. *Lancet* 2006; 368: 2156-2166.
3. Cuijpers P, Sijbrandij M, Koole S, et al. Psychological treatment of generalized anxiety disorder: a meta-analysis. *Clin Psychol Rev* 2014; 34: 130-140.
4. Yonkers KA, Dyck IR, Warshaw M, et al. Factors predicting the course of generalised anxiety disorder. *Br J Psychiatry* 2000; 176: 544-549.
5. Ngo CQ, Phan PT, Vu GV, et al. Effects of Different Comorbidities on Health-Related Quality of Life among Respiratory Patients in Vietnam. *J Clin Med* 2019; 8. pii: E214.
6. Nguyen SH, Nguyen LH, Vu GT, et al. Health-Related Quality of Life Impairment among Patients with Different Skin Diseases in Vietnam: A Cross-Sectional Study. *Int J Environ Res Public Health* 2019; 16. pii: E305.
7. De Berardis D, Olivieri L, Nappi F, et al. Vortioxetine and Aripiprazole Combination in Treatment-Resistant Obsessive-Compulsive Disorder: A Case Report. *J Clin Psychopharmacol* 2017; 37: 732-734.
8. Lu Y, Ho CS, McIntyre RS, et al. Effects of vortioxetine and fluoxetine on the level of Brain Derived Neurotrophic Factors (BDNF) in the hippocampus of chronic unpredictable mild stress-induced depressive rats. *Brain Res Bull* 2018; 142: 1-7.
9. Pae CU, Wang SM, Han C, et al. Vortioxetine: a meta-analysis of 12 short-term, randomized, placebo-controlled clinical trials for the treatment of major depressive disorder. *J Psychiatry Neurosci* 2015; 40: 174-186.
10. Berhan A, Barker A. Vortioxetine in the treatment of adult patients with major depressive disorder: a meta-analysis of randomized double-blind controlled trials. *BMC Psychiatry* 2014; 14: 276.
11. Fu J, Chen Y. The efficacy and safety of 5 mg/d vortioxetine compared to placebo for major depressive disorder: a meta-analysis. *Psychopharmacology (Berl)* 2015; 232: 7-16.
12. Tran BX, Ha GH, Vu GT, et al. Indices of Change, Expectations, and Popularity of Biological

- 1  
2  
3 1 Treatments for Major Depressive Disorder between 1988 and 2017: A Scientometric Analysis. *Int J*  
4  
5 2 *Environ Res Public Health* 2019; 16. pii: E2255.  
6  
7 3 13. Bidzan L, Mahableshwarkar AR, Jacobsen P, et al. Vortioxetine (Lu AA21004) in generalized  
8  
9 4 anxiety disorder: results of an 8-week, multinational, randomized, double-blind, placebo-controlled  
10  
11 5 clinical trial. *Eur Neuropsychopharmacol* 2012; 22: 847-857.  
12  
13 6 14. Mahableshwarkar AR, Jacobsen PL, Serenko M, et al. A randomized, double-blind, fixed-dose study  
14  
15 7 comparing the efficacy and tolerability of vortioxetine 2.5 and 10mg in acute treatment of adults  
16  
17 8 with generalized anxiety disorder. *Hum Psychopharmacol* 2014; 29: 64-72.  
18  
19 9 15. Mahableshwarkar AR, Jacobsen PL, Chen Y, et al. A randomised, double-blind, placebo controlled,  
20  
21 10 duloxetine-referenced study of the efficacy and tolerability of vortioxetine in the acute treatment of  
22  
23 11 adults with generalised anxiety disorder. *Int J Clin Pract* 2014; 6: 49-59.  
24  
25 12 16. Rothschild AJ, Mahableshwarkar AR, Jacobsen P, et al. Vortioxetine (Lu AA21004) 5 mg in  
26  
27 13 generalized anxiety disorder: results of an 8-week randomized, double-blind, placebo-controlled  
28  
29 14 clinical trial in the United States. *Eur Neuropsychopharmacol* 2012; 22: 858-866.  
30  
31 15 17. Baldwin DS, Florea I, Jacobsen PL, et al. A meta-analysis of the efficacy of vortioxetine in patients  
32  
33 16 with major depressive disorder (MDD) and high levels of anxiety symptoms. *J Affect Disord* 2016;  
34  
35 17 206: 140-150.  
36  
37 18 18. Pae CU, Wang SM, Han C, et al. Vortioxetine, multimodal antidepressant for generalized anxiety  
38  
39 19 disorder: a systematic review and meta-analysis. *J Psychiatr Res* 2015; 64: 88-98.  
40  
41 20 19. Yee A, Ng CG, Seng LH. Vortioxetine Treatment for Anxiety Disorder: A Meta-Analysis Study.  
42  
43 21 *Curr Drug Targets* 2017; 19: 1412-1423.  
44  
45 22 20. Fu J, Peng L, Li X. The efficacy and safety of multiple doses of vortioxetine for generalized anxiety  
46  
47 23 disorder: a meta-analysis. *Neuropsychiatr Dis Treat* 2016; 12: 951-959.  
48  
49 24 21. Choo CC, Chew PKH, Ho CS, et al. Quality of Life in Patients With a Major Mental Disorder in  
50  
51 25 Singapore. *Front Psychiatry* 2019; 9: 727.  
52  
53 26 22. Lee Y, Rosenblat JD, Lee J, et al. Efficacy of antidepressants on measures of workplace functioning  
54  
55 27 in major depressive disorder: A systematic review. *J Affect Disord* 2018; 227: 406-415.  
56  
57 28 23. Bourland SL, Stanley MA, Synder AG, et al. Quality of life in older adults with generalized anxiety

- 1 disorder. *Aging. And Mental Health* 2000; 4: 315-323.
- 2
- 3 1
- 4
- 5 2 24. Frisch MB. *Manual and treatment guide for the Quality of Life Inventory*. Minneapolis: National
- 6
- 7 3
- 8 Computer Systems Inc; 1994.
- 9 4 25. Katschnig H. How useful is the concept of quality of life in psychiatry? In: Katschnig H, Freeman
- 10
- 11 5
- 12 H, Sartorius N. (Editors), *Quality of life in mental disorders*. Chichester: Wiley; 1997. p 3-16.
- 13 6 26. Steven EH. *Bridging science and service: A report by the National Advisory Mental Health*
- 14
- 15 7
- 16 Council's Clinical Treatment and Services Research Workgroup (NIH Publication No. 99-4353).
- 17 8
- 18 9 27. Zhou X, Keitner GI, Qin B, et al. Atypical Antipsychotic Augmentation for Treatment-Resistant
- 19
- 20 10
- 21 Depression: A Systematic Review and Network Meta-Analysis. *Int J Neuropsychopharmacol* 2015;
- 22
- 23 11
- 24 18: pyv060.
- 25 12 28. Mogotsi M, Kaminer D, Stein DJ. Quality of life in the anxiety disorders. *Harvard Rev Psychiat*
- 26
- 27 13
- 28 2000; 8: 273-282.
- 29 14 29. Henning ER, Turk CL, Mennin DS, et al. Impairment and quality of life in individuals with
- 30
- 31 15
- 32 generalized anxiety disorder. *Depress Anxiety* 2007; 24: 342-349.
- 33 16 30. Endicott J, Russell JM, Raskin J, et al. Duloxetine treatment for role functioning improvement in
- 34
- 35 17
- 36 generalized anxiety disorder: three independent studies. *J Clin Psychiatry* 2007; 68: 518-524.
- 37 18 31. Higgins JPT, Green S. *Cochrane Handbook for Systematic Reviews of Interventions Version 5.1.0*
- 38
- 39 19
- 40 updated March 2011. Available at: <http://www.cochrane-handbook.org>. Accessed November 13,
- 41
- 42 20
- 43 2018.
- 44 21 32. Moher D, Liberati A, Tetzlaff J, et al. Reprint--preferred reporting items for systematic reviews and
- 45
- 46 22
- 47 meta-analyses: the PRISMA statement. *Phys Ther* 2009; 89: 873-880.
- 48 23 33. Testa MA, Simonson DC. Assessment of quality-of-life outcomes. *N Engl J Med* 1996; 334: 835-
- 49
- 50 24
- 51 840.
- 52 25 34. Urbach DR. Measuring quality of life after surgery. *Surg Innov* 2005; 12: 161-165.
- 53
- 54 26 35. Ware JE Jr, Sherbourne CD. The MOS 36-item short-form health survey (SF-36). *Med Care* 1992;
- 55
- 56 27
- 57 30: 473-483.
- 58 28 36. Sheehan DV, Harnett-Sheehan K, Raj BA. The measurement of disability. *Int Clin*
- 59
- 60



- 1  
2  
3 1 Psychopharmacol 1996; 11: 89-95.  
4  
5 2 37. Higgins J, Thompson S, Deeks J, et al. Statistical heterogeneity in systematic reviews of clinical  
6  
7 3 trials: a critical appraisal of guideline and practice. *J Health Serv Res Policy* 2002; 7: 51-61.  
8  
9 4 38. Higgins JP, Thompson SG, Deeks JJ, et al. Measuring inconsistency in meta-analyses. *BMJ* 2003;  
10  
11 5 327: 557-660.  
12  
13 6 39. Ho RC, Ong HS, Kudva KG, et al. How to critically appraise and apply meta-analyses in clinical  
14  
15 7 practice. *Int J Rheum Dis* 2010; 13: 294-299.  
16  
17 8 40. Egger M, Davey Smith G, et al. Bias in meta-analysis detected by a simple, graphical test. *BMJ*  
18  
19 9 1997; 315: 629-634.  
20  
21 10 41. Fu J, Peng L, Li X. The efficacy and safety of multiple doses of vortioxetine for generalized anxiety  
22  
23 11 disorder: a meta-analysis. *Neuropsychiatr Dis Treat* 2016; 12: 951-959.  
24  
25 12 42. Khan A, Khan S, Brown WA. Are placebo controls necessary to test new antidepressants and  
26  
27 13 anxiolytics? *Int J Neuropsychopharmacol* 2002; 5: 193-197.  
28  
29 14 43. Liebowitz MR, Stein MB, Tancer M, et al. A randomized, double-blind, fixed-dose comparison of  
30  
31 15 paroxetine and placebo in the treatment of generalized social anxiety disorder. *J Clin Psychiatry*.  
32  
33 16 2002;63(1): 66-74.  
34  
35 17 44. Trivedi MH, Rush AJ, Wisniewski SR, et al. Evaluation of outcomes with citalopram for depression  
36  
37 18 using measurement-based care in STAR\*D: implications for clinical practice. *Am J Psychiatry*  
38  
39 19 2006; 163(1): 28-40.  
40  
41 20 45. Florea I, Loft H, Danchenko N, et al. The effect of vortioxetine on overall patient functioning in  
42  
43 21 patients with major depressive disorder. *Brain Behav* 2017; 7: e00622.  
44  
45 22 46. Christensen MC, Loft H, Florea I, et al. Efficacy of vortioxetine in working patients with  
46  
47 23 generalized anxiety disorder. *CNS Spectr* 2017. [https://doi: 10.1017/S1092852917000761](https://doi.org/10.1017/S1092852917000761).  
48  
49 24 47. Baldwin DS, Loft H, Florea I. Lu AA21004, a multimodal psychotropic agent, in the prevention of  
50  
51 25 relapse in adult patients with generalized anxiety disorder. *Int Clin Psychopharmacol* 2012; 27: 197-  
52  
53 26 207.2  
54  
55  
56  
57  
58  
59  
60

- 1  
2  
3  
4 1 48. Perna G, Alciati A, Riva A, et al. Long-Term Pharmacological Treatments of Anxiety Disorders: An  
5  
6 2 Updated Systematic Review. Curr Psychiatry Rep 2016; 18: 23.  
7  
8 3  
9

10  
11  
12  
13  
14  
15  
16  
17  
18  
19  
20  
21  
22  
23  
24  
25  
26  
27  
28  
29  
30  
31  
32  
33  
34  
35  
36  
37  
38  
39  
40  
41  
42  
43  
44  
45  
46  
47  
48  
49  
50  
51  
52  
53  
54  
55  
56  
57  
58  
59  
60

For peer review only

1  
2  
3  
4  
5 **Table 1. Description of included studies.**

| 6 Study                                         | 7 Patients n                | 8 Age (mean, SD)                                                      | 9 Sex (Male, n, %)                                      | 10 Interventions                                              | 11 Duration (weeks) | 12 Key inclusion criteria for GAD |
|-------------------------------------------------|-----------------------------|-----------------------------------------------------------------------|---------------------------------------------------------|---------------------------------------------------------------|---------------------|-----------------------------------|
| 13 Bidzan et al. (2012) <sup>13</sup>           | T: 150;<br>C: 151           | T: 45.0 (14.1);<br>C: 45.3 (13.5)                                     | T: 47 (31.3);<br>C: 58 (38.4)                           | T: vtx (5 mg/d);<br>C: placebo                                | 8                   | DSM-IV-TR,<br>HAM-A $\geq$ 20     |
| 14 Mahableshwarkar et al. (2014a) <sup>14</sup> | T: 152, 152;<br>C: 153      | T: 40.8 (13.8);<br>43.3 (15.0);<br>C: 39.5 (13.5)                     | T: 49 (32.2),<br>56 (36.8);<br>C: 48 (31.4)             | T: vtx 2.5 mg/d,<br>vtx 10 mg/d;<br>C: placebo                | 8                   | DSM-IV-TR,<br>HAM-A $\geq$ 20     |
| 15 Mahableshwarkar et al. (2014b) <sup>15</sup> | T: 156, 156, 156;<br>C: 157 | T: 39.2 (11.90),<br>37.7 (11.96),<br>39.8 (12.33);<br>C: 36.8 (12.12) | T: 47 (30.1),<br>56 (35.9),<br>51 (32.7);<br>C: 55 (35) | T: vtx 2.5 mg/d,<br>vtx 5 mg/d,<br>vtx 10 mg/d;<br>C: placebo | 8                   | DSM-IV-TR,<br>HAM-A $\geq$ 20     |
| 16 Rothschild et al. (2012) <sup>16</sup>       | T: 152;<br>C: 152           | T: 41.0 (14.05);<br>C: 41.4 (12.81)                                   | T: 49 (32.2);<br>C: 55 (36.2)                           | T: vtx 5 mg/d;<br>C: placebo                                  | 8                   | DSM-IV-TR,<br>HAM-A $\geq$ 20     |

17 Note: T, Treatment group; C, Control group; mg/d, mg/day; GAD, Generalized anxiety disorder; DSM-IV-TR,  
18 Diagnostic and Statistical Manual of Mental Disorders, 4th edition Text Revision; HAM-A, Hamilton Anxiety  
19 Rating; vtx, Vortioxetine.  
20  
21  
22  
23  
24  
25  
26  
27  
28  
29  
30  
31  
32  
33  
34  
35  
36  
37  
38  
39  
40  
41  
42  
43  
44  
45  
46  
47  
48  
49  
50  
51  
52  
53  
54  
55  
56  
57  
58  
59  
60

## Figure legends

**Figure 1:** Odds ratios (ORs) and 95% confidence intervals (CIs) of the individual studies and the pooled data, comparing the response rates between the vortioxetine-treated and placebo groups.

Notes: (A) 2.5-mg/day vortioxetine versus placebo, (B) 5-mg/day vortioxetine versus placebo, and (C) 10-mg/day vortioxetine versus placebo.

**Figure 2:** Odds ratios (ORs) and 95% confidence intervals (CIs) of the individual studies and the pooled data, comparing the remission rates between the vortioxetine- and placebo groups.

Notes: (A) 2.5-mg/day vortioxetine versus placebo, (B) 5-mg/day vortioxetine versus placebo, and (C) 10-mg/day vortioxetine versus placebo.

**Figure 3:** Standardized mean differences (SMDs) and 95% confidence intervals (CIs) of the individual studies and the pooled data, comparing the mean change from baseline in total scores on the HAM-A, between the vortioxetine- and placebo groups.

Notes: (A) 2.5-mg/day vortioxetine versus placebo, (B) 5-mg/day vortioxetine versus placebo, and (C) 10-mg/day vortioxetine versus placebo.

**Figure 4:** Standardized mean differences (SMDs) and 95% confidence intervals (CIs) of the individual studies and the pooled data, comparing the Short Form 36 Health Survey (SF-36) scores between the vortioxetine- and placebo groups.

Notes: (A) 2.5-mg/day vortioxetine versus placebo, (B) 5-mg/day vortioxetine versus placebo, and (C) 10-mg/day vortioxetine versus placebo.

**Figure 5:** Standardized mean differences (SMDs) and 95% confidence intervals (CIs) of the individual studies and the pooled data, comparing the Sheehan Disability Scale (SDS) scores between the vortioxetine and placebo groups.

Notes: (A) 2.5-mg/day vortioxetine versus placebo, (B) 5-mg/day vortioxetine versus placebo, and (C) 10-mg/day vortioxetine versus placebo.



Figure 1

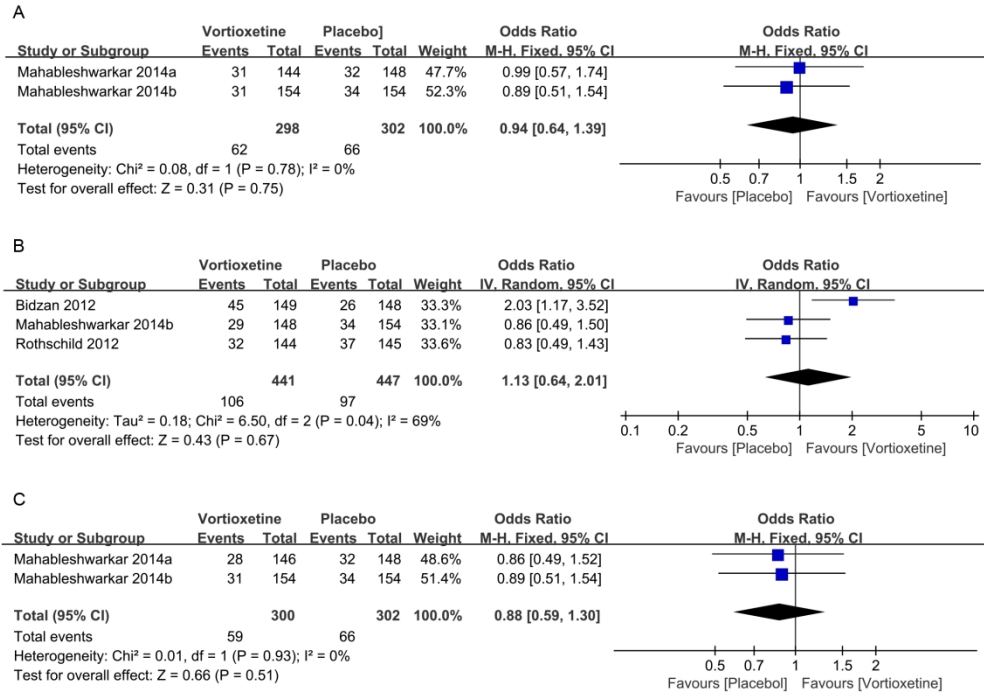

Figure 2

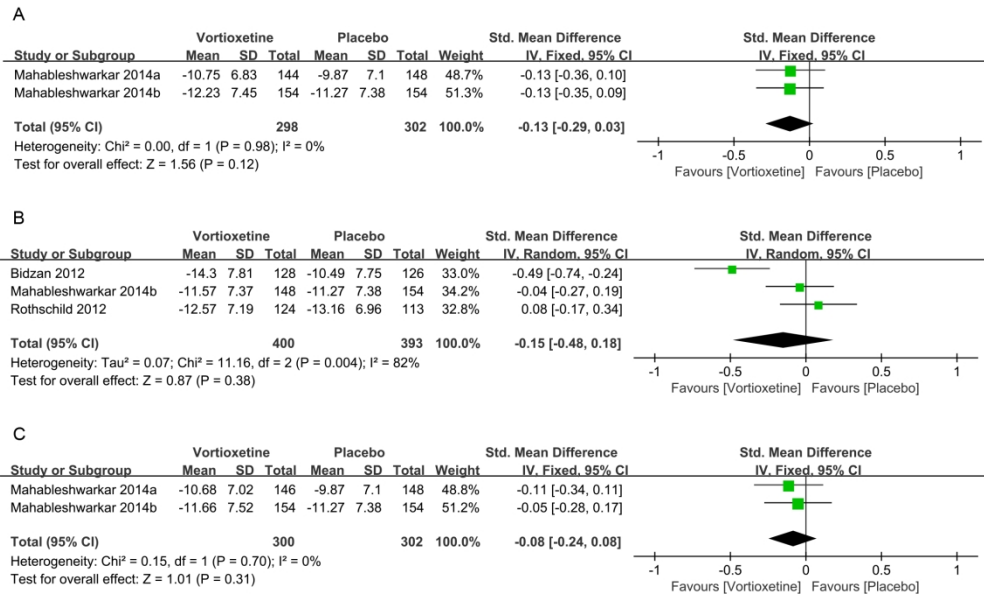

Figure 3



Figure 4

197x108mm (300 x 300 DPI)



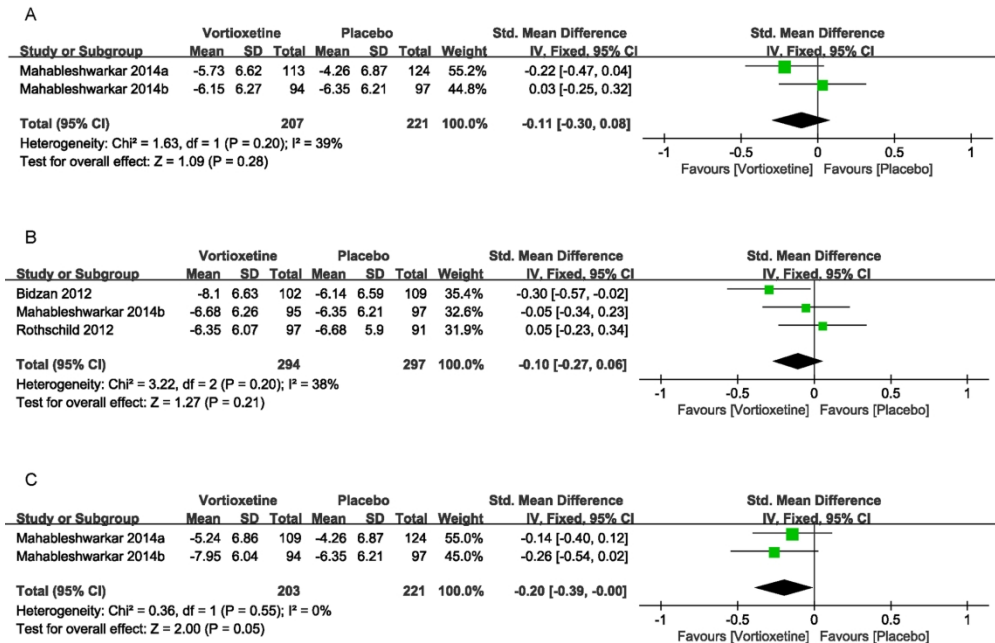

Figure 5

196x128mm (300 x 300 DPI)

### Supplementary Table 1: Search Strategy

| Search Strategy (Pubmed) |                                                                                                                                                                                                                                                                                                                                    |
|--------------------------|------------------------------------------------------------------------------------------------------------------------------------------------------------------------------------------------------------------------------------------------------------------------------------------------------------------------------------|
| #1                       | ((vortioxetine[Title/Abstract]) OR Lu AA21004[Title/Abstract])<br>OR Brintellix[Title/Abstract]                                                                                                                                                                                                                                    |
| #2                       | ((((anxiety[Title/Abstract]) OR anxiety disorder[Title/Abstract])<br>OR anxiety disorders[Title/Abstract]) OR mood<br>disorder[Title/Abstract]) OR mood disorders[Title/Abstract]                                                                                                                                                  |
| #3                       | Search "Anxiety Disorders"[Mesh]                                                                                                                                                                                                                                                                                                   |
| #4 (#2 OR #3)            | ("Anxiety Disorders"[Mesh]) OR (((((anxiety[Title/Abstract]) OR<br>anxiety disorder[Title/Abstract]) OR anxiety<br>disorders[Title/Abstract]) OR mood disorder[Title/Abstract]) OR<br>mood disorders[Title/Abstract])                                                                                                              |
| #5 (#1 OR #4)            | ((("Anxiety Disorders"[Mesh]) OR (((((anxiety[Title/Abstract])<br>OR anxiety disorder[Title/Abstract]) OR anxiety<br>disorders[Title/Abstract]) OR mood disorder[Title/Abstract]) OR<br>mood disorders[Title/Abstract]))) AND<br>(((vortioxetine[Title/Abstract]) OR Lu AA21004[Title/Abstract])<br>OR Brintellix[Title/Abstract]) |
| #6                       | Filters: Clinical Trial; Randomized Controlled Trial                                                                                                                                                                                                                                                                               |

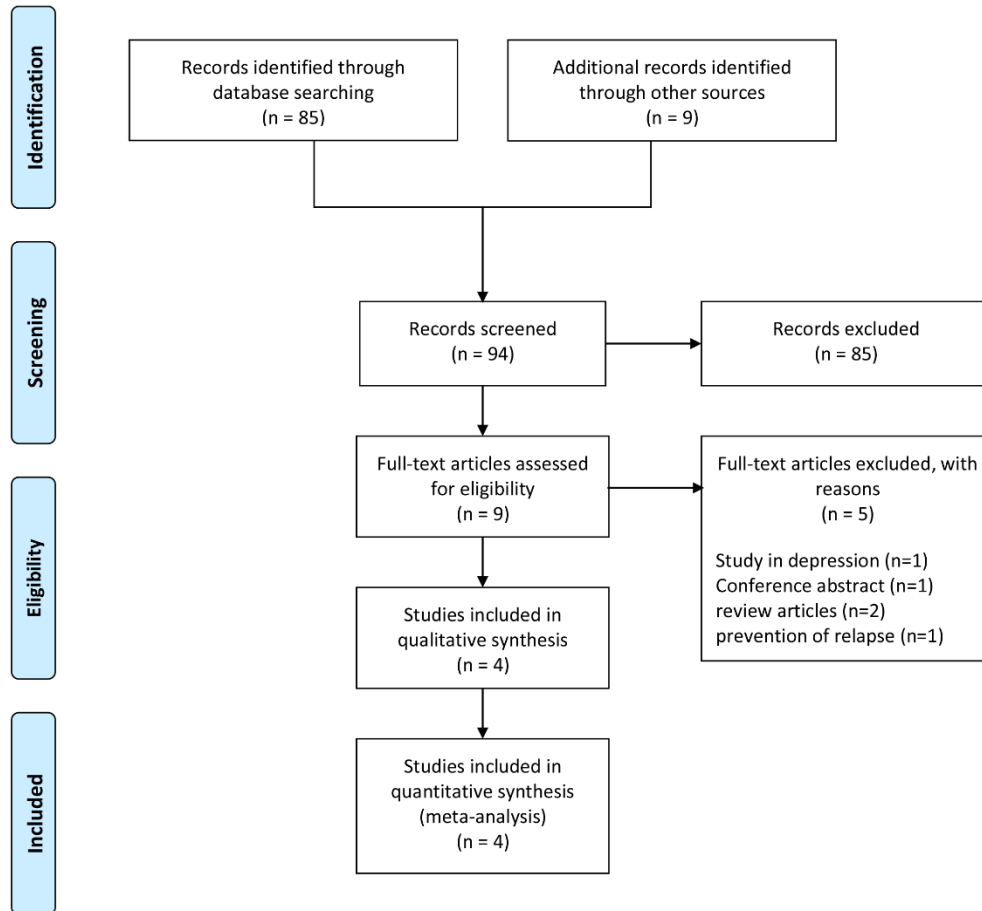

Supplementary Figure 1: Search flow for the trial identification and selection process.

1  
2  
3  
4  
5  
6  
7  
8  
9  
10  
11  
12  
13  
14  
15  
16  
17  
18  
19  
20  
21  
22  
23  
24  
25  
26  
27  
28  
29  
30  
31  
32  
33  
34  
35  
36  
37  
38  
39  
40  
41  
42  
43  
44  
45  
46  
47  
48  
49  
50  
51  
52  
53  
54  
55  
56  
57  
58  
59  
60

|                       | Random sequence generation (selection bias) | Allocation concealment (selection bias) | Blinding of participants and personnel (performance bias) | Incomplete outcome data (attrition bias) | Selective reporting (reporting bias) | Other bias |
|-----------------------|---------------------------------------------|-----------------------------------------|-----------------------------------------------------------|------------------------------------------|--------------------------------------|------------|
| Bidzan 2012           | ?                                           | ?                                       | +                                                         | +                                        | +                                    | ?          |
| Mahableshwarkar 2014a | ?                                           | ?                                       | +                                                         | +                                        | +                                    | ?          |
| Mahableshwarkar 2014b | +                                           | +                                       | +                                                         | +                                        | +                                    | ?          |
| Rothschild 2012       | +                                           | +                                       | +                                                         | +                                        | +                                    | ?          |

**Supplementary Figure 2:** Summarized risks of bias for the included studies.

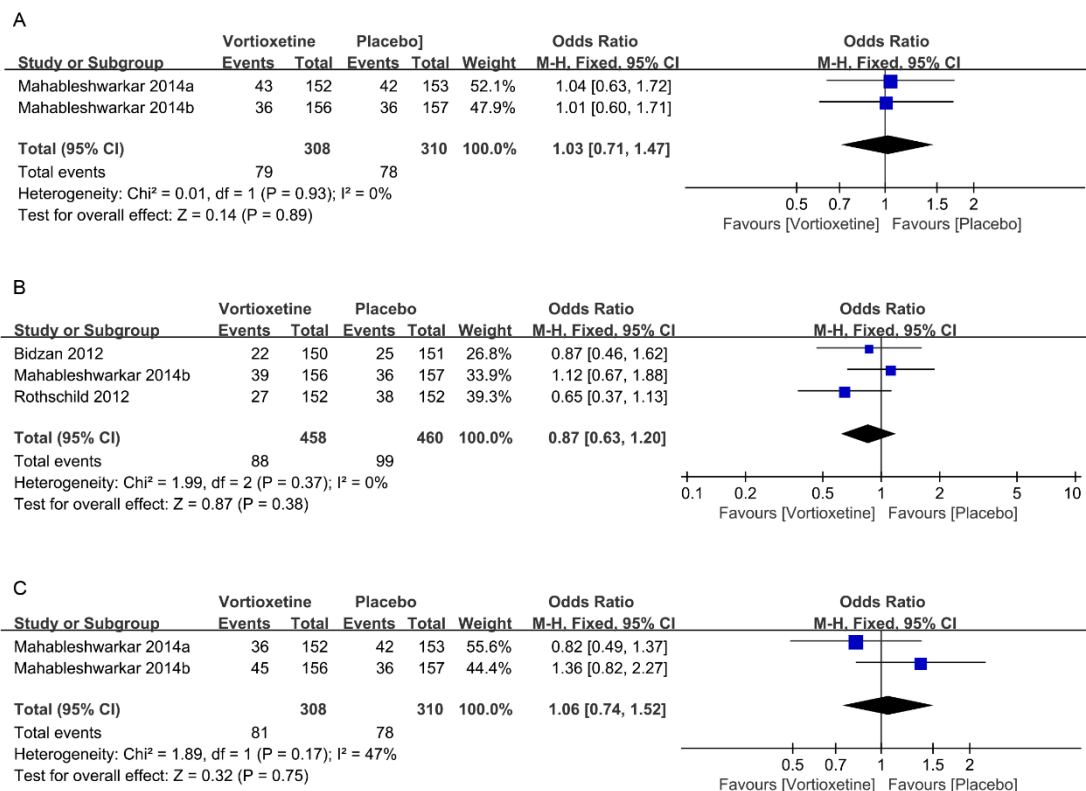

**Supplementary Figure 3:** Odds ratios (ORs) and 95% confidence intervals (CIs) of the selected studies and the pooled data, comparing the discontinuation rates for any reason, between the vortioxetine and placebo groups.

Notes: (A) 2.5-mg/day vortioxetine versus placebo, (B) 5-mg/day vortioxetine versus placebo, and (C) 10-mg/day vortioxetine versus placebo.

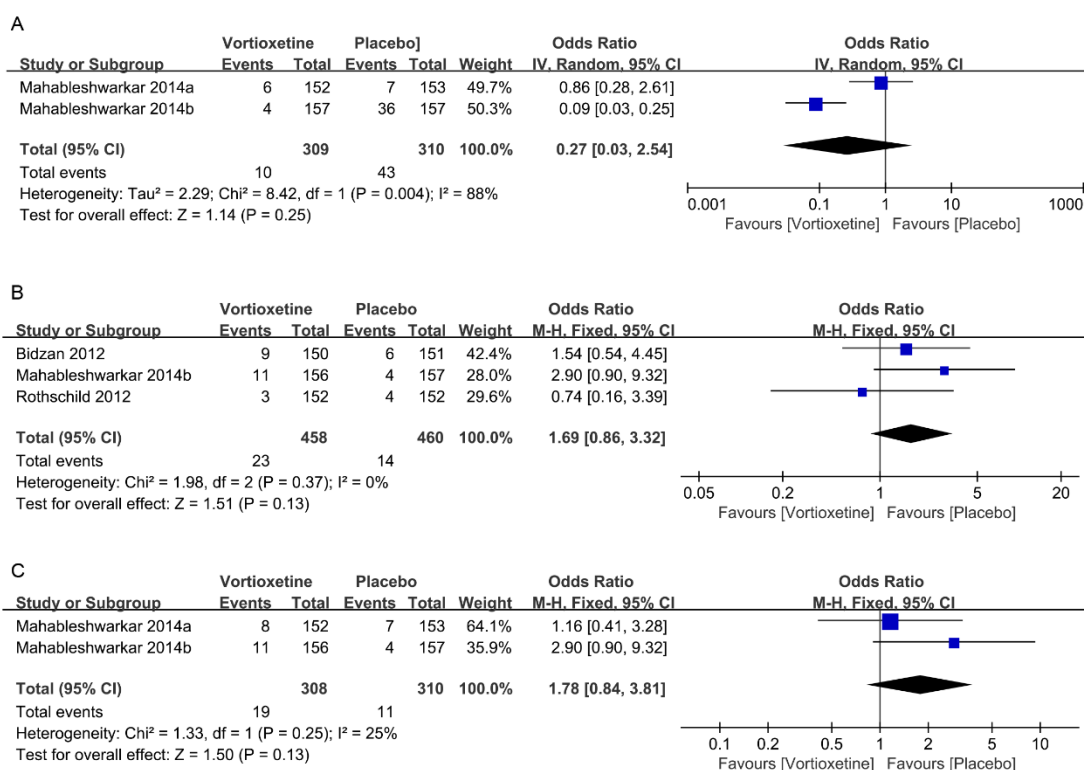

**Supplementary Figure 4:** Odds ratios (ORs) and 95% confidence intervals (CIs) of the selected studies and the pooled data, comparing the discontinuation rates due to adverse events (AEs), between vortioxetine and placebo groups.

Notes: (A) 2.5-mg/day vortioxetine versus placebo, (B) 5-mg/day vortioxetine versus placebo, and (C) 10-mg/day vortioxetine versus placebo.

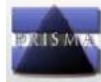

# PRISMA 2009 Checklist

| Section/topic                      | #  | Checklist item                                                                                                                                                                                                                                                                                              | Reported on page # |
|------------------------------------|----|-------------------------------------------------------------------------------------------------------------------------------------------------------------------------------------------------------------------------------------------------------------------------------------------------------------|--------------------|
| <b>TITLE</b>                       |    |                                                                                                                                                                                                                                                                                                             |                    |
| Title                              | 1  | Identify the report as a systematic review, meta-analysis, or both.                                                                                                                                                                                                                                         | 1                  |
| <b>ABSTRACT</b>                    |    |                                                                                                                                                                                                                                                                                                             |                    |
| Structured summary                 | 2  | Provide a structured summary including, as applicable: background; objectives; data sources; study eligibility criteria, participants, and interventions; study appraisal and synthesis methods; results; limitations; conclusions and implications of key findings; systematic review registration number. | 2                  |
| <b>INTRODUCTION</b>                |    |                                                                                                                                                                                                                                                                                                             |                    |
| Rationale                          | 3  | Describe the rationale for the review in the context of what is already known.                                                                                                                                                                                                                              | 3                  |
| Objectives                         | 4  | Provide an explicit statement of questions being addressed with reference to participants, interventions, comparisons, outcomes, and study design (PICOS).                                                                                                                                                  | 3-4                |
| <b>METHODS</b>                     |    |                                                                                                                                                                                                                                                                                                             |                    |
| Protocol and registration          | 5  | Indicate if a review protocol exists, if and where it can be accessed (e.g., Web address), and, if available, provide registration information including registration number.                                                                                                                               | 4                  |
| Eligibility criteria               | 6  | Specify study characteristics (e.g., PICOS, length of follow-up) and report characteristics (e.g., years considered, language, publication status) used as criteria for eligibility, giving rationale.                                                                                                      | 4                  |
| Information sources                | 7  | Describe all information sources (e.g., databases with dates of coverage, contact with study authors to identify additional studies) in the search and date last searched.                                                                                                                                  | 4                  |
| Search                             | 8  | Present full electronic search strategy for at least one database, including any limits used, such that it could be repeated.                                                                                                                                                                               | 4                  |
| Study selection                    | 9  | State the process for selecting studies (i.e., screening, eligibility, included in systematic review, and, if applicable, included in the meta-analysis).                                                                                                                                                   | 4-5                |
| Data collection process            | 10 | Describe method of data extraction from reports (e.g., piloted forms, independently, in duplicate) and any processes for obtaining and confirming data from investigators.                                                                                                                                  | 5                  |
| Data items                         | 11 | List and define all variables for which data were sought (e.g., PICOS, funding sources) and any assumptions and simplifications made.                                                                                                                                                                       | 5                  |
| Risk of bias in individual studies | 12 | Describe methods used for assessing risk of bias of individual studies (including specification of whether this was done at the study or outcome level), and how this information is to be used in any data synthesis.                                                                                      | 5                  |
| Summary measures                   | 13 | State the principal summary measures (e.g., risk ratio, difference in means).                                                                                                                                                                                                                               | 6                  |
| Synthesis of results               | 14 | Describe the methods of handling data and combining results of studies, if done, including measures of consistency (e.g., $I^2$ ) for each meta-analysis.                                                                                                                                                   | 6                  |

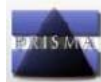

# PRISMA 2009 Checklist

Page 1 of 2

| Section/topic                 | #  | Checklist item                                                                                                                                                                                           | Reported on page # |
|-------------------------------|----|----------------------------------------------------------------------------------------------------------------------------------------------------------------------------------------------------------|--------------------|
| Risk of bias across studies   | 15 | Specify any assessment of risk of bias that may affect the cumulative evidence (e.g., publication bias, selective reporting within studies).                                                             | 5-6                |
| Additional analyses           | 16 | Describe methods of additional analyses (e.g., sensitivity or subgroup analyses, meta-regression), if done, indicating which were pre-specified.                                                         | 5-6                |
| <b>RESULTS</b>                |    |                                                                                                                                                                                                          |                    |
| Study selection               | 17 | Give numbers of studies screened, assessed for eligibility, and included in the review, with reasons for exclusions at each stage, ideally with a flow diagram.                                          | 6                  |
| Study characteristics         | 18 | For each study, present characteristics for which data were extracted (e.g., study size, PICOS, follow-up period) and provide the citations.                                                             | 6                  |
| Risk of bias within studies   | 19 | Present data on risk of bias of each study and, if available, any outcome level assessment (see item 12).                                                                                                | 7                  |
| Results of individual studies | 20 | For all outcomes considered (benefits or harms), present, for each study: (a) simple summary data for each intervention group (b) effect estimates and confidence intervals, ideally with a forest plot. | 7-8                |
| Synthesis of results          | 21 | Present results of each meta-analysis done, including confidence intervals and measures of consistency.                                                                                                  | 7-8                |
| Risk of bias across studies   | 22 | Present results of any assessment of risk of bias across studies (see Item 15).                                                                                                                          | 7                  |
| Additional analysis           | 23 | Give results of additional analyses, if done (e.g., sensitivity or subgroup analyses, meta-regression [see Item 16]).                                                                                    | 7-8                |
| <b>DISCUSSION</b>             |    |                                                                                                                                                                                                          |                    |
| Summary of evidence           | 24 | Summarize the main findings including the strength of evidence for each main outcome; consider their relevance to key groups (e.g., healthcare providers, users, and policy makers).                     | 8-9                |
| Limitations                   | 25 | Discuss limitations at study and outcome level (e.g., risk of bias), and at review-level (e.g., incomplete retrieval of identified research, reporting bias).                                            | 10                 |
| Conclusions                   | 26 | Provide a general interpretation of the results in the context of other evidence, and implications for future research.                                                                                  | 10                 |
| <b>FUNDING</b>                |    |                                                                                                                                                                                                          |                    |
| Funding                       | 27 | Describe sources of funding for the systematic review and other support (e.g., supply of data); role of funders for the systematic review.                                                               | 10                 |

From: Moher D, Liberati A, Tetzlaff J, Altman DG, The PRISMA Group (2009). Preferred Reporting Items for Systematic Reviews and Meta-Analyses: The PRISMA Statement. PLoS Med 6(7): e1000097. doi:10.1371/journal.pmed1000097

For more information, visit: [www.prisma-statement.org](http://www.prisma-statement.org).

Page 2 of 2

For peer review only - <http://bmjopen.bmj.com/site/about/guidelines.xhtml>
