# Supplementary material for: Vortioxetine treatment for generalised anxiety disorder: a meta-analysis of anxiety, quality of life and safety outcomes
Source: PubMed Central journal article supplement — BMJ Open. 2019 Nov 28;9(11):e033161. doi: 10.1136/bmjopen-2019-033161 (PMC6924794; doi:10.1136/bmjopen-2019-033161), 2019-11-28
Supplement: bmjopen-2019-033161supp001.pdf [file bmjopen-2019-033161supp001.pdf]

**Supplementary Table 1: Search Strategy**

| <b>Search Strategy (Pubmed)</b> |                                                                                                                                                                                                                                                                                                                                   |
|---------------------------------|-----------------------------------------------------------------------------------------------------------------------------------------------------------------------------------------------------------------------------------------------------------------------------------------------------------------------------------|
| #1                              | ((vortioxetine[Title/Abstract] OR Lu AA21004[Title/Abstract])<br>OR Brintellix[Title/Abstract])                                                                                                                                                                                                                                   |
| #2                              | ((((anxiety[Title/Abstract] OR anxiety disorder[Title/Abstract])<br>OR anxiety disorders[Title/Abstract]) OR mood<br>disorder[Title/Abstract]) OR mood disorders[Title/Abstract])                                                                                                                                                 |
| #3                              | Search "Anxiety Disorders"[Mesh]                                                                                                                                                                                                                                                                                                  |
| #4 (#2 OR #3)                   | ("Anxiety Disorders"[Mesh] OR (((((anxiety[Title/Abstract] OR<br>anxiety disorder[Title/Abstract]) OR anxiety<br>disorders[Title/Abstract]) OR mood disorder[Title/Abstract]) OR<br>mood disorders[Title/Abstract]))                                                                                                              |
| #5 (#1 OR #4)                   | ((("Anxiety Disorders"[Mesh] OR (((((anxiety[Title/Abstract]/<br>OR anxiety disorder[Title/Abstract]) OR anxiety<br>disorders[Title/Abstract]) OR mood disorder[Title/Abstract]) OR<br>mood disorders[Title/Abstract]))) AND<br>(((vortioxetine[Title/Abstract] OR Lu AA21004[Title/Abstract])<br>OR Brintellix[Title/Abstract])) |
| #6                              | Filters: Clinical Trial; Randomized Controlled Trial                                                                                                                                                                                                                                                                              |

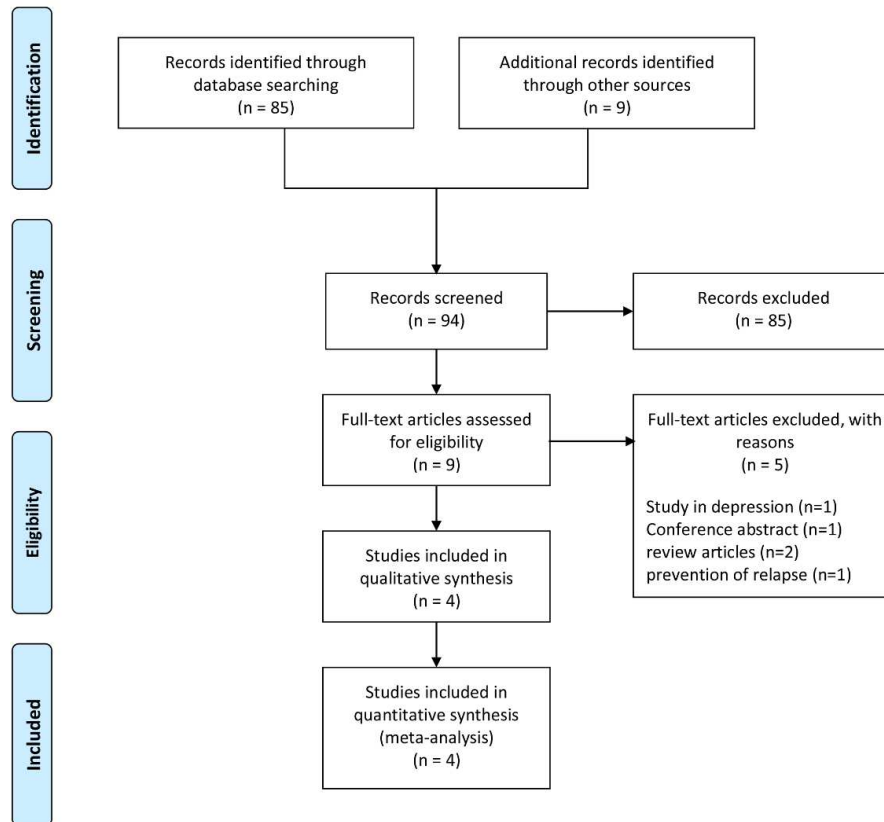

**Supplementary Figure 1:** Search flow for the trial identification and selection process.

|                       | Random sequence generation (selection bias) | Allocation concealment (selection bias) | Blinding of participants and personnel (performance bias) | Incomplete outcome data (attrition bias) | Selective reporting (reporting bias) | Other bias |
|-----------------------|---------------------------------------------|-----------------------------------------|-----------------------------------------------------------|------------------------------------------|--------------------------------------|------------|
| Bidzan 2012           | ?                                           | ?                                       | +                                                         | +                                        | +                                    | ?          |
| Mahableshwarkar 2014a | ?                                           | ?                                       | +                                                         | +                                        | +                                    | ?          |
| Mahableshwarkar 2014b | +                                           | +                                       | +                                                         | +                                        | +                                    | ?          |
| Rothschild 2012       | +                                           | +                                       | +                                                         | +                                        | +                                    | ?          |

**Supplementary Figure 2:** Summarized risks of bias for the included studies.

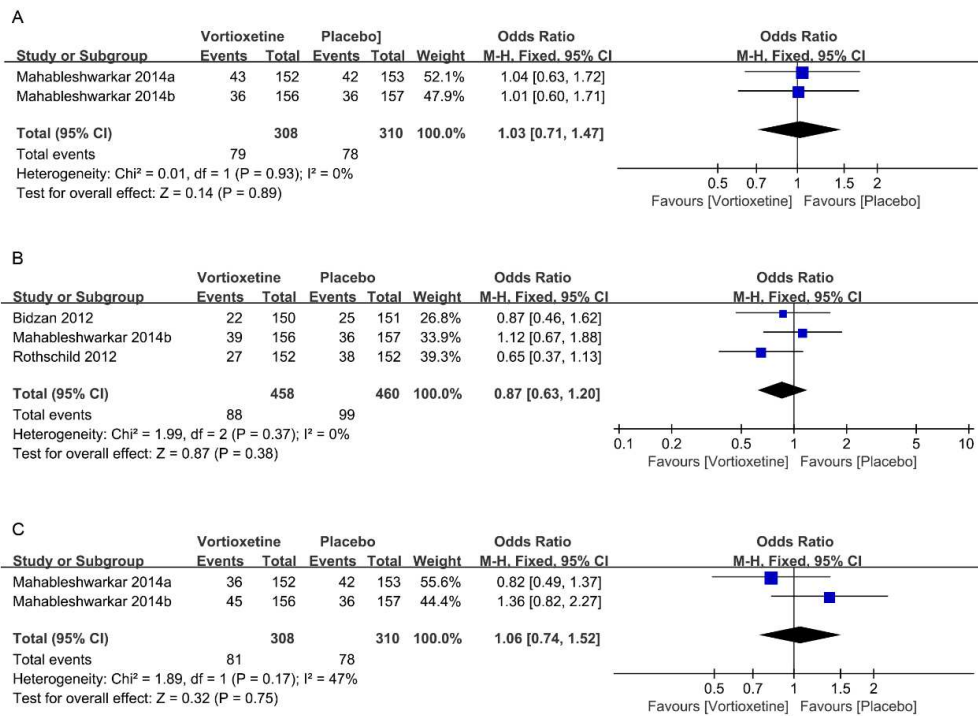

**Supplementary Figure 3:** Odds ratios (ORs) and 95% confidence intervals (CIs) of the selected studies and the pooled data, comparing the discontinuation rates for any reason, between the vortioxetine and placebo groups.

Notes: (A) 2.5-mg/day vortioxetine versus placebo, (B) 5-mg/day vortioxetine versus placebo, and (C) 10-mg/day vortioxetine versus placebo.

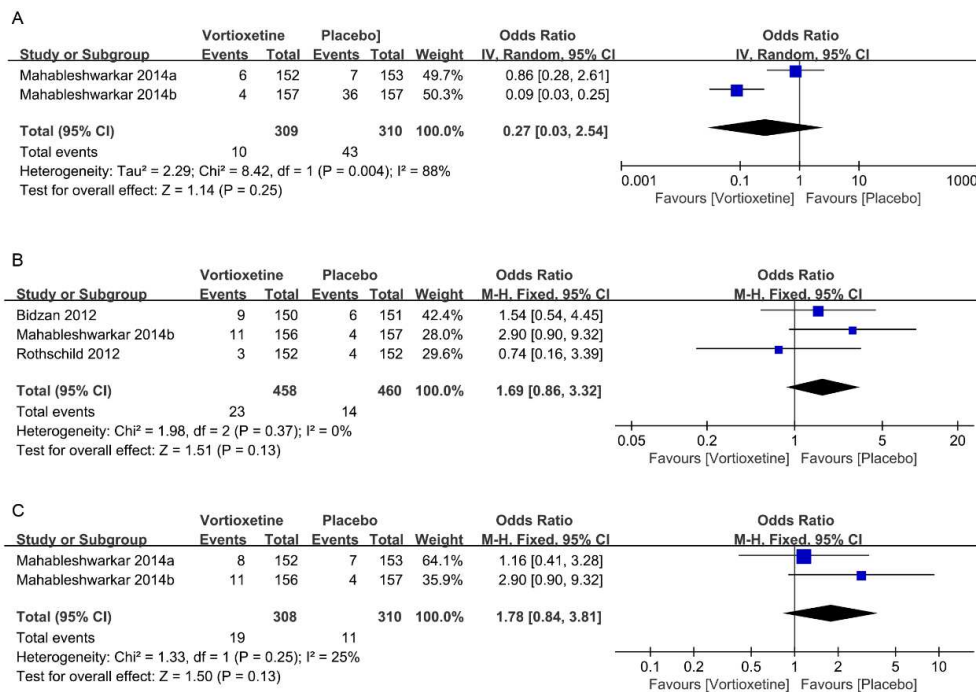

**Supplementary Figure 4:** Odds ratios (ORs) and 95% confidence intervals (CIs) of the selected studies and the pooled data, comparing the discontinuation rates due to adverse events (AEs), between vortioxetine and placebo groups.

Notes: (A) 2.5-mg/day vortioxetine versus placebo, (B) 5-mg/day vortioxetine versus placebo, and (C) 10-mg/day vortioxetine versus placebo.
